# Supplementary material for: PCIP-seq: simultaneous sequencing of integrated viral genomes and their insertion sites with long reads
Source: PubMed Central journal article supplement (PMC8025556; doi:10.1186/s13059-021-02307-0), 2021-04-06
Supplement: 13059_2021_2307_MOESM1_ESM.pdf [file 13059_2021_2307_MOESM1_ESM.pdf]

**Supplementary Information for:**

PCIP-seq: simultaneous sequencing of integrated viral genomes and their insertion sites with long reads

Maria Artesi, Vincent Hahaut, Basiel Cole, Laurens Lambrechts, Fereshteh Ashrafi, Ambroise Marçais, Olivier Hermine, Philip Griebel, Natasa Arsic, Frank van der Meer, Arsène Burny, Dominique Bron, Elettra Bianchi, Philippe Delvenne, Vincent Bours, Carole Charlier, Michel Georges, Linos Vandekerckhove, Anne Van den Broeke, Keith Durkin

Corresponding author  
Anne Van den Broeke  
anne.vandenbroeke@bordet.be

**This PDF file includes:**

Figures S1 to S12

Tables S1 to S8

Supplementary text:

Supplementary note 1: Rationale behind the use of CRISPR-cas9 to cleave circular DNA

Supplementary note 2: Effect of coverage on SNP calling

Supplementary Methods

Supplementary References

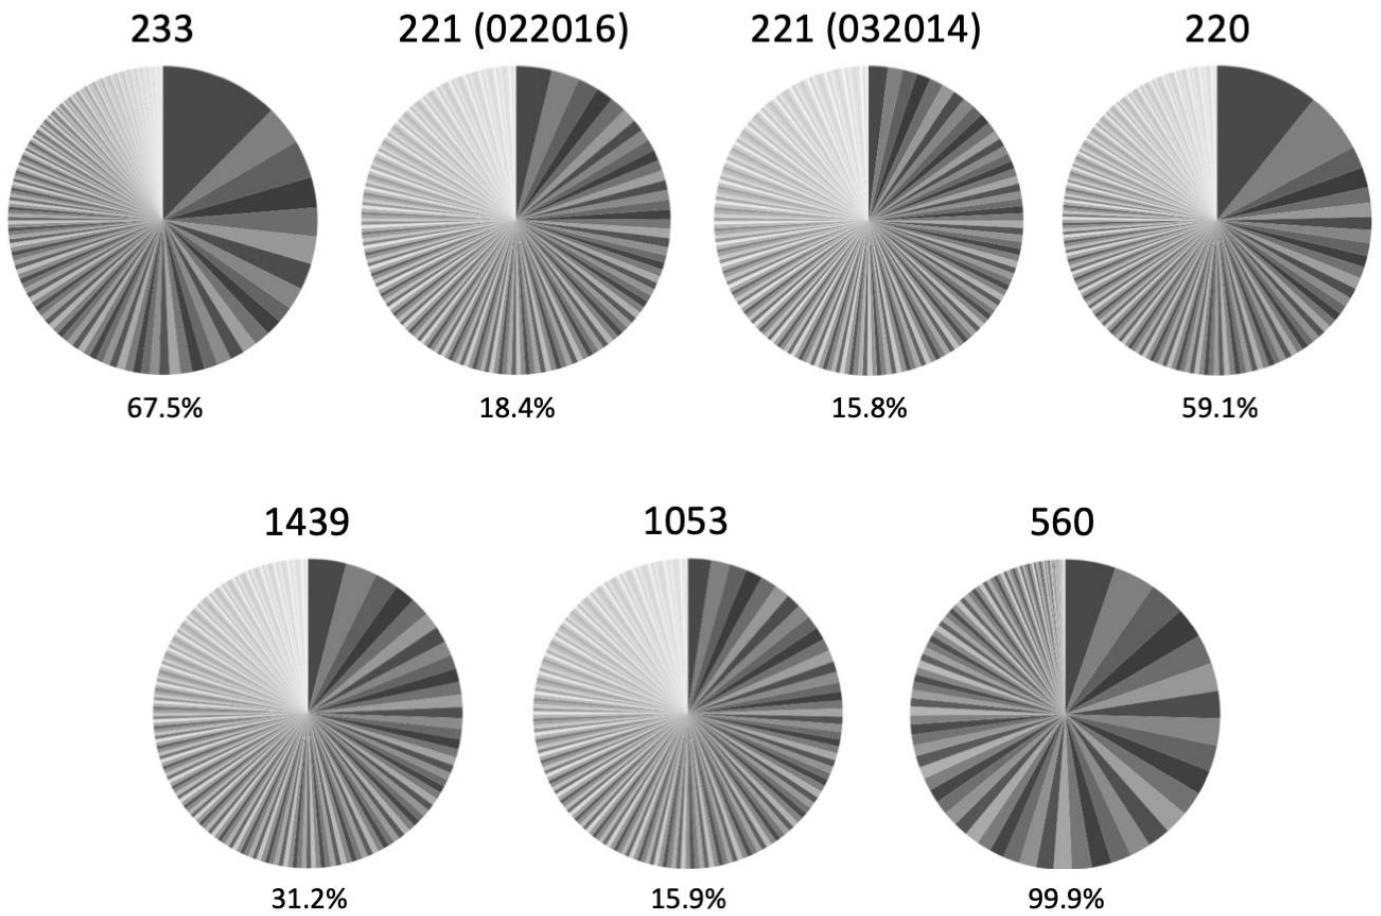

**Fig. S1** Pie charts showing the relative abundance of the 200 largest clones in the four sheep (top) and three cattle (bottom) infected with BLV, each slice of the pie represents a single insertion site, the % below indicated what fraction of the overall reads these 200 clones represent.

## Ovine 221 (022016) & 221 (032014) BLV SNPs validated via clone specific PCR

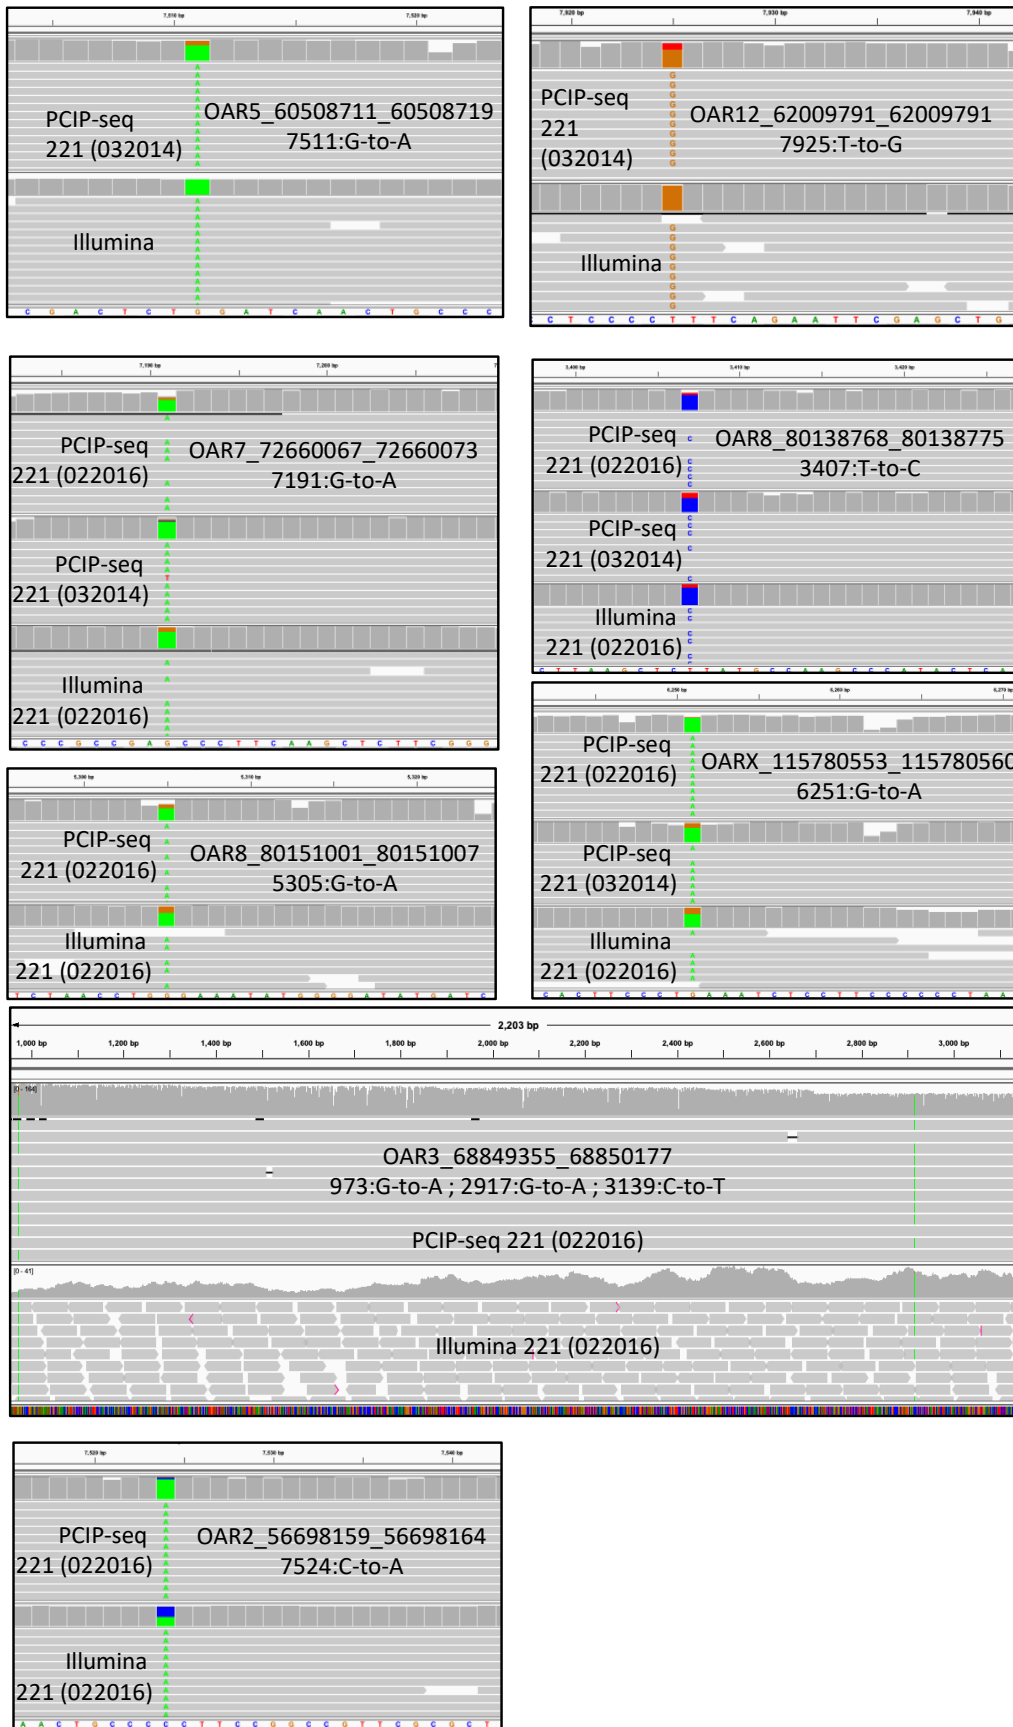

**Fig. S2** SNPs identified by PCIP-seq in BLV validated by clone specific PCR. These SNPs came from eighteen proviruses, 10 from cattle, 8 from sheep.

# Bovine 1439 BLV SNPs validated via clone specific PCR

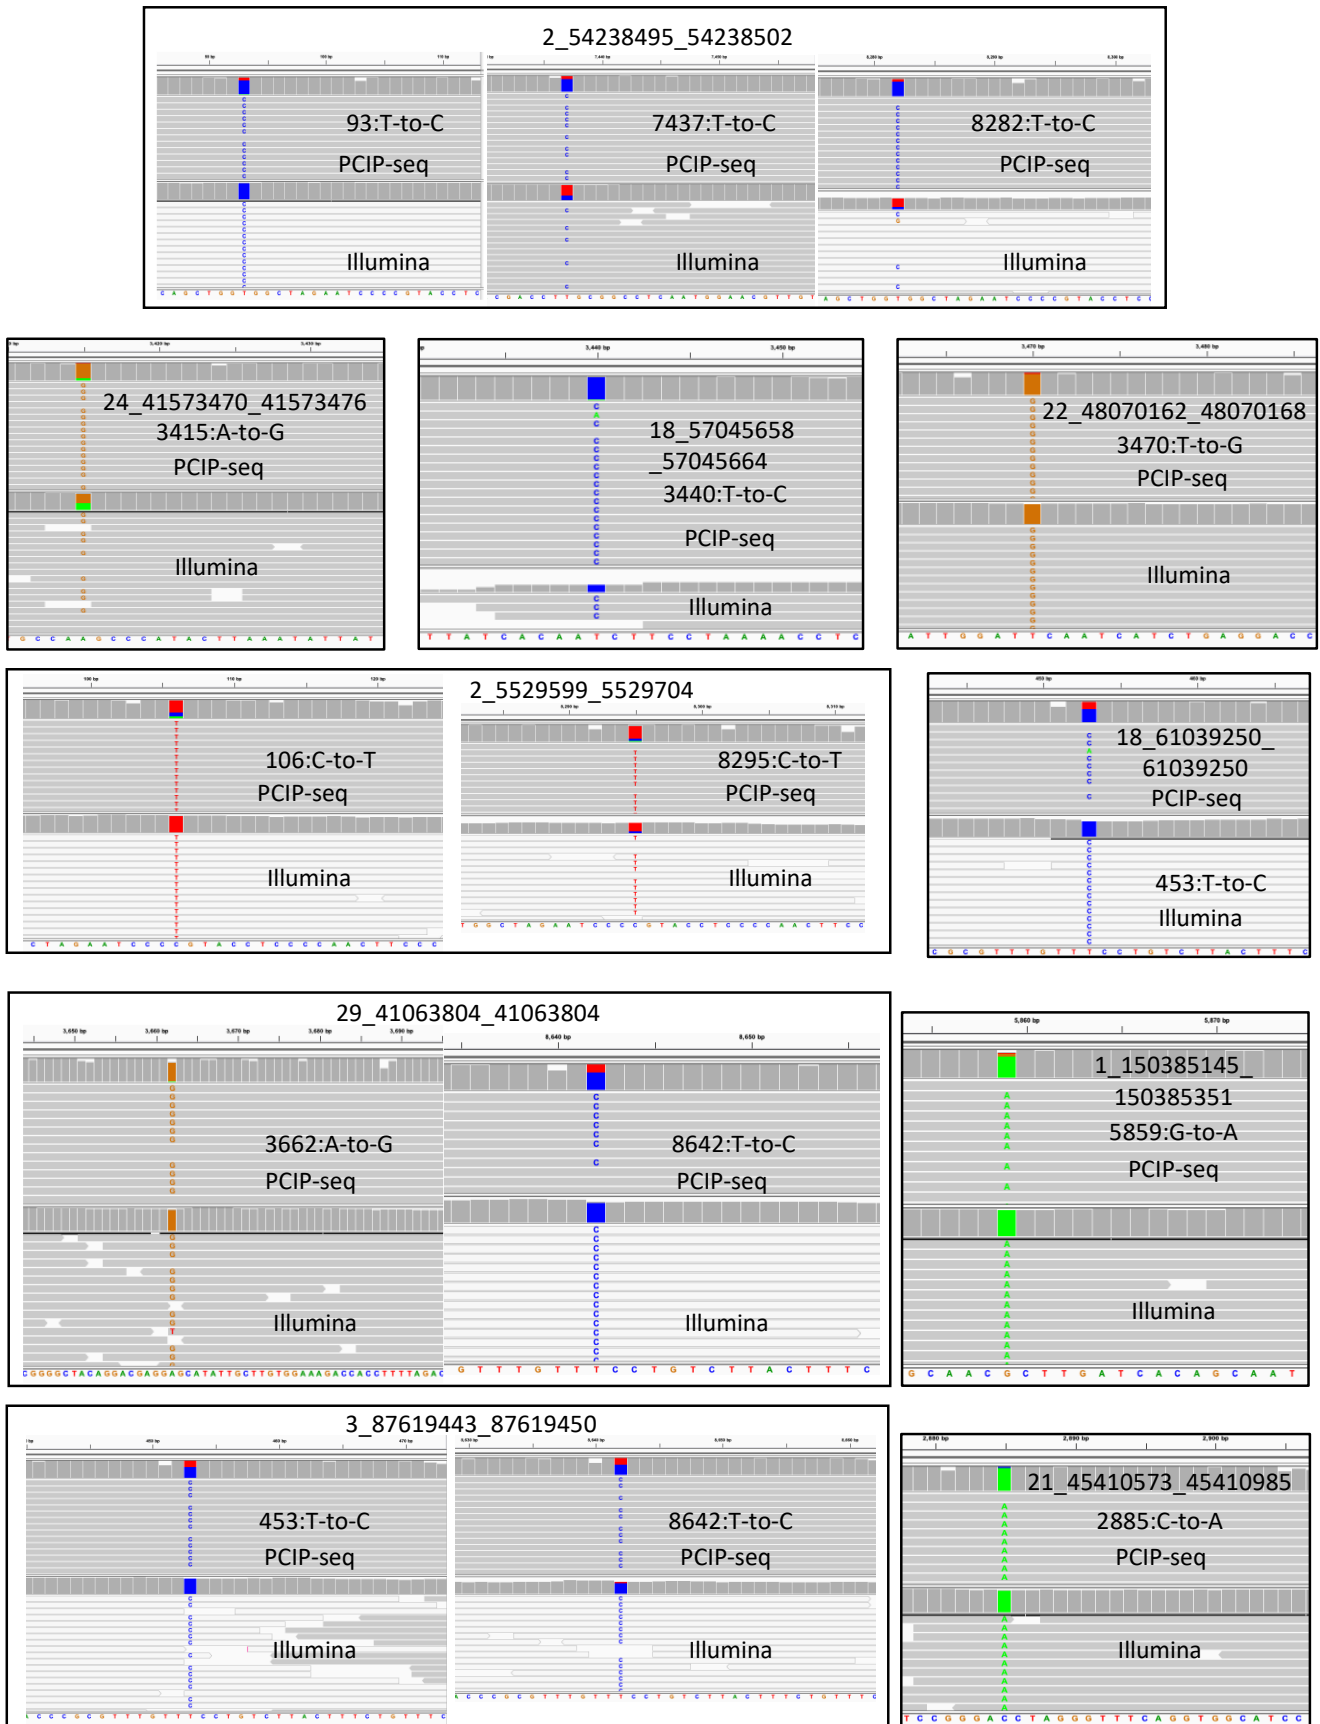

Fig. S2 continued

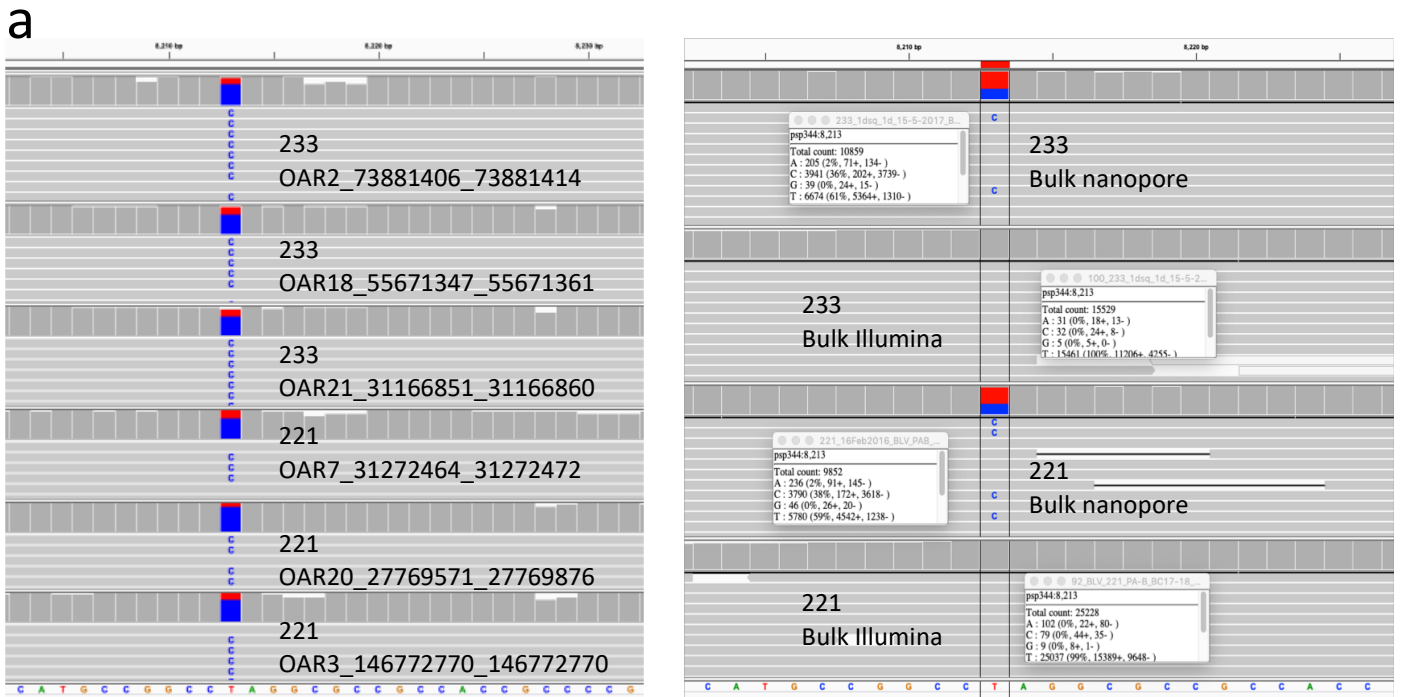

## b Ovine 233

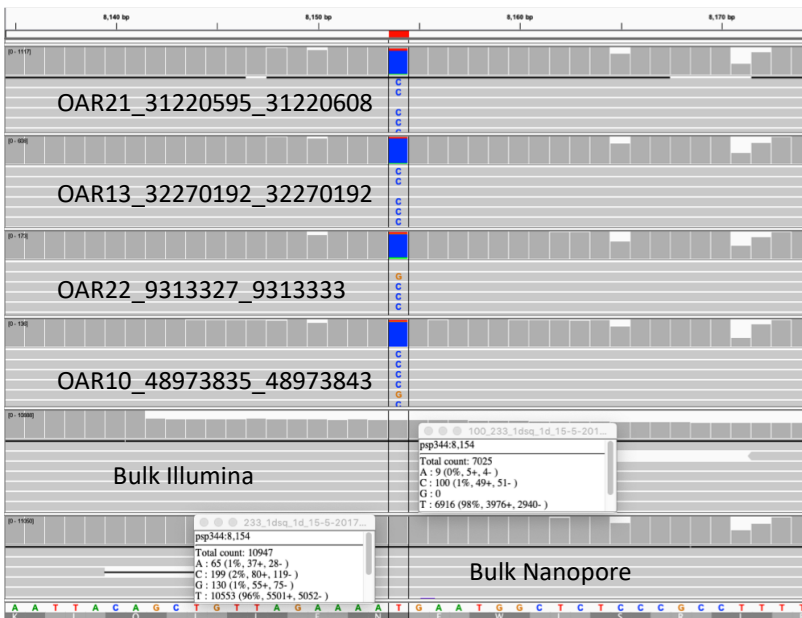

**Fig. S3** Distinguishing between real SNPs and technical artifacts **(a)** We observed a number of BLV proviruses in all the samples that had an apparent SNP at position 8213. Shown are three examples from sheep 233 and 211. When we looked at this position in reads mapped to the provirus without first sorting based on insertion site (referred to as bulk) we saw a C called 36 and 38% of the time respectively in the Nanopore data. In the bulk Illumina data, generated from the same sample, we saw the C is called 0% of the time indicating a technical artifact. As a consequence, SNPs from this position were excluded. **(b)** In animal 233 we found 16 proviruses (provirus inclusion was based on the less stringent criteria of >10 reads covering the position, not filtered for PCR duplicates) carrying a T-to-C transition within the Tax ORF at position 8154, this variant does not change the amino acid. Shown are screen captures for 4 of the proviruses carrying the SNP, Illumina and Nanopore bulk sequencing from the same sample show C is called at a 2% frequency in Nanopore, while with Illumina C is called at a 1% frequency. This indicates that the SNPs observed in these proviruses are not a technical artifact.

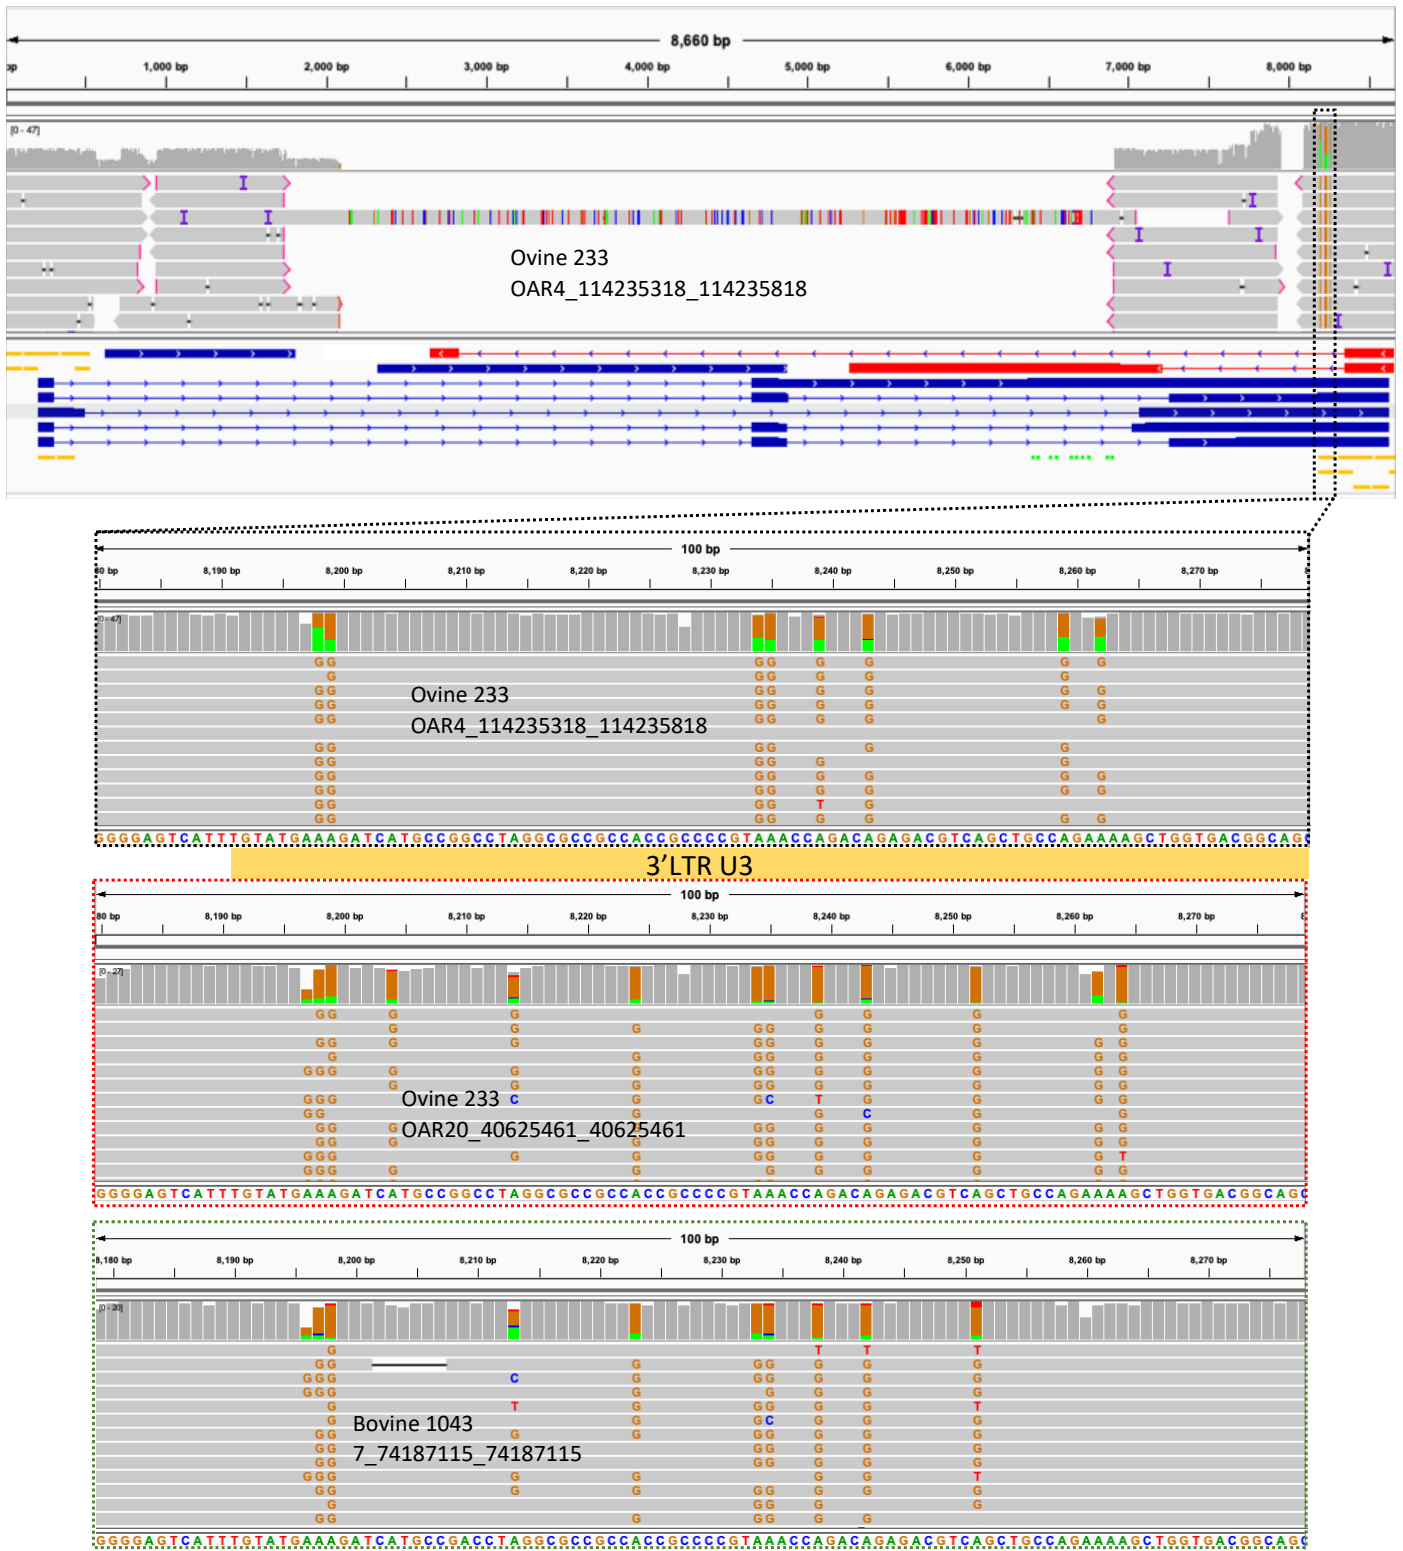

Fig. S4 Hypermutation of a ~70bp region in U3 of the 3'LTR of BLV proviruses.

## Ovine 221 (022016) & 221 (032014) BLV SVs validated by clone specific PCR

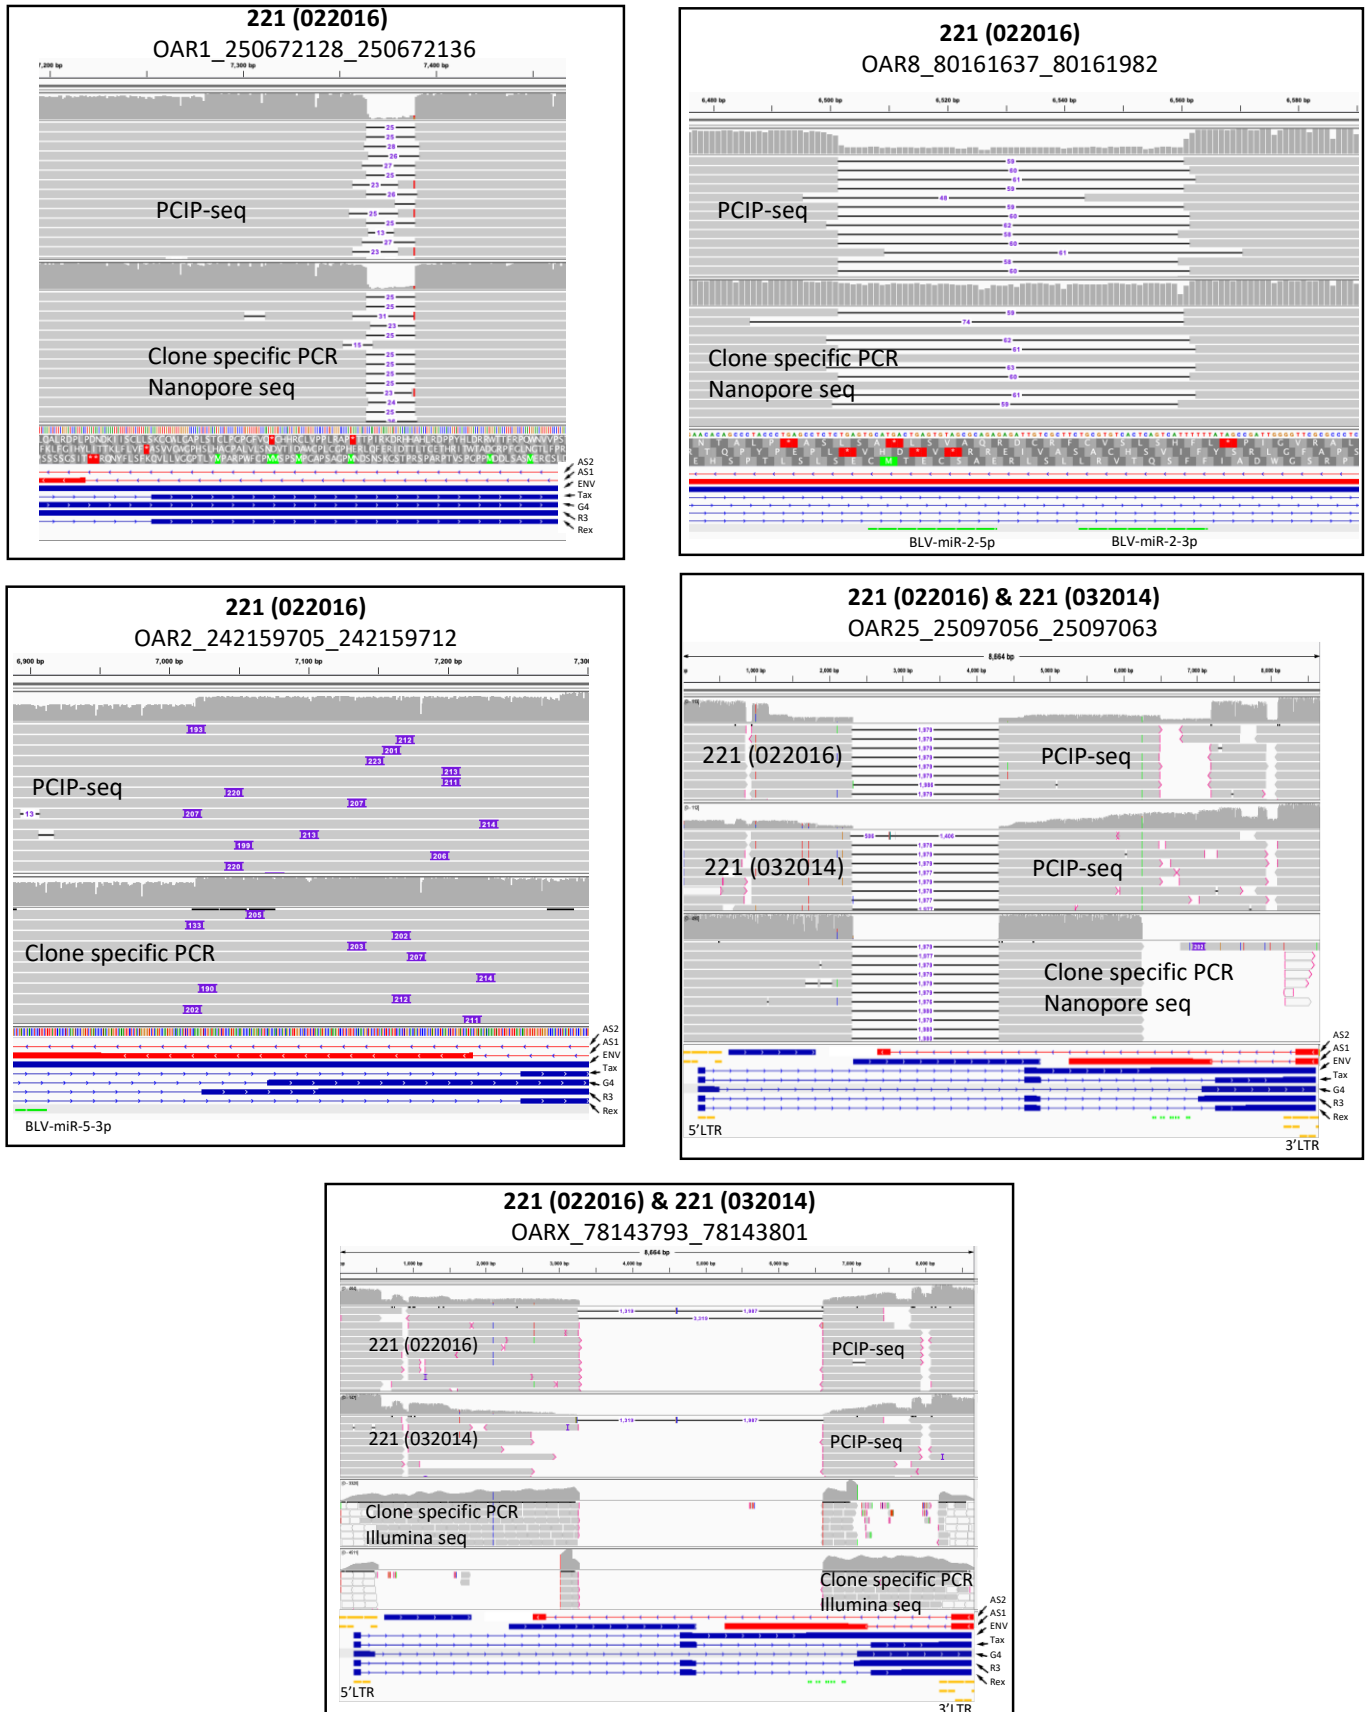

**Fig. S5** Clone specific PCR to validate BLV structural variants. These CNVs are from fourteen proviruses, 7 from cattle, 7 from sheep. One of the sheep proviruses was also validated for a SNP.

## Ovine 233

### BLV SVs validated by clone specific PCR

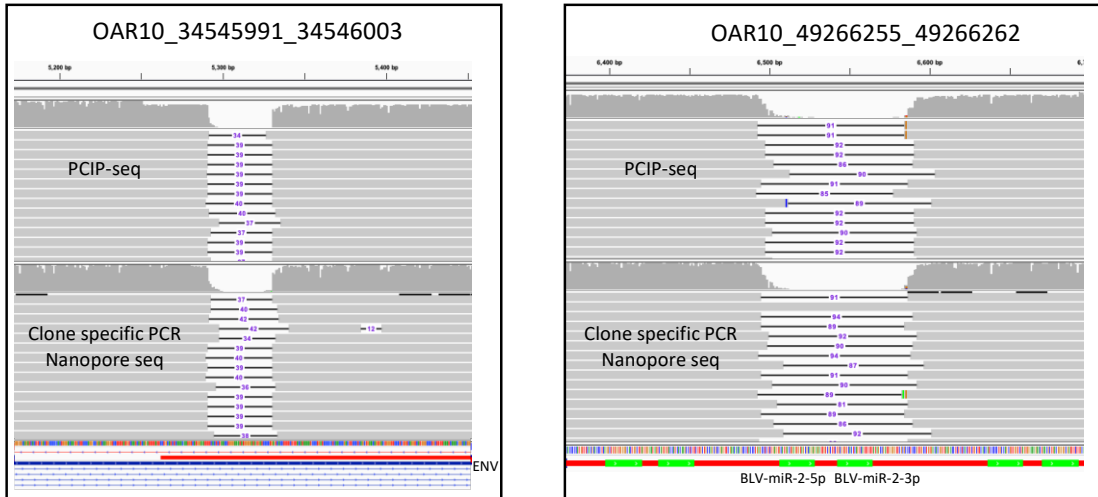

## Bovine 1439

### BLV SVs validated by clone specific PCR

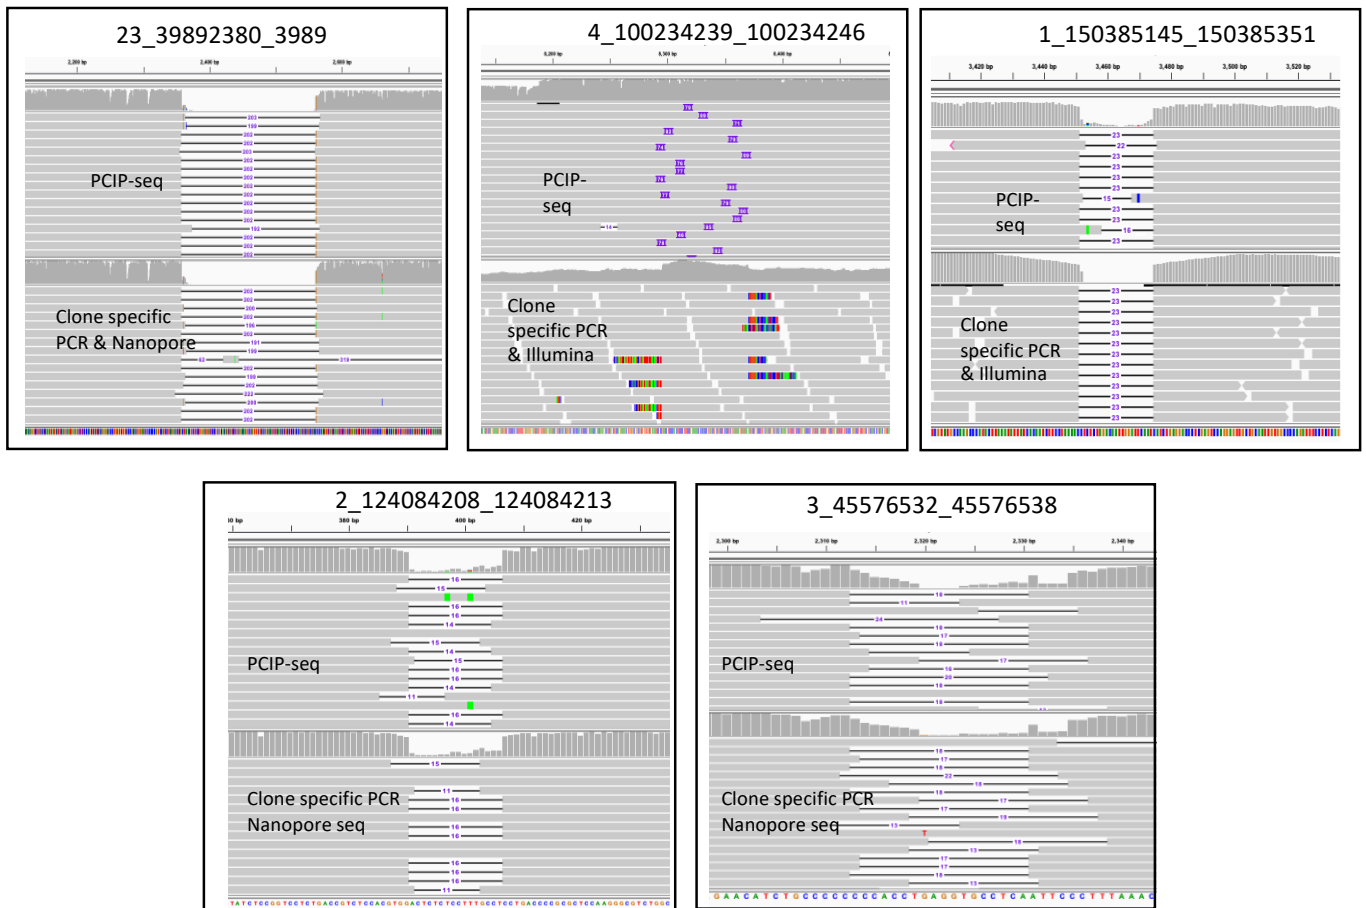

Fig. S5 continued



# Bovine 1439

## BLV 5' deletions validated by clone specific PCR

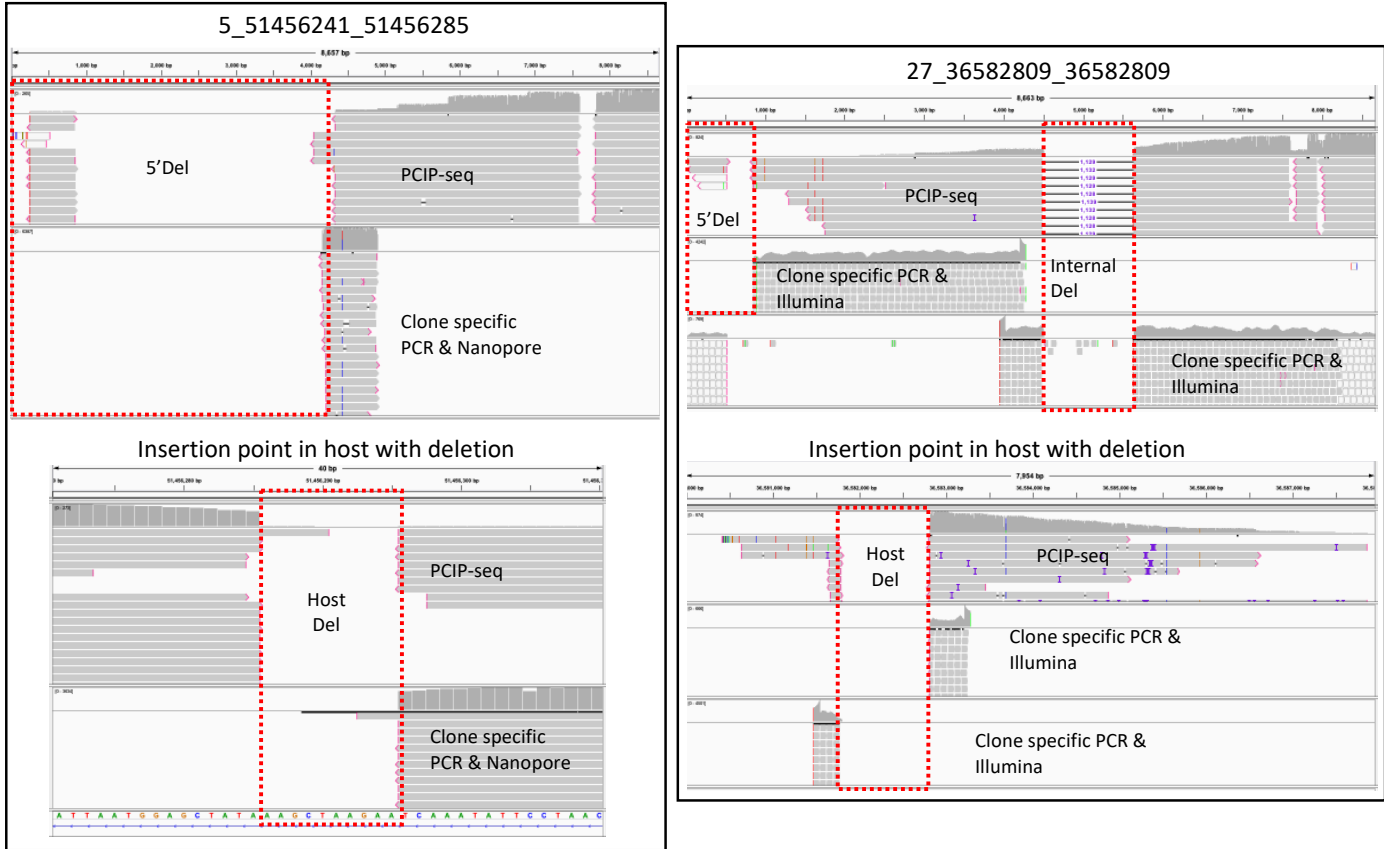

Fig. S5 continued

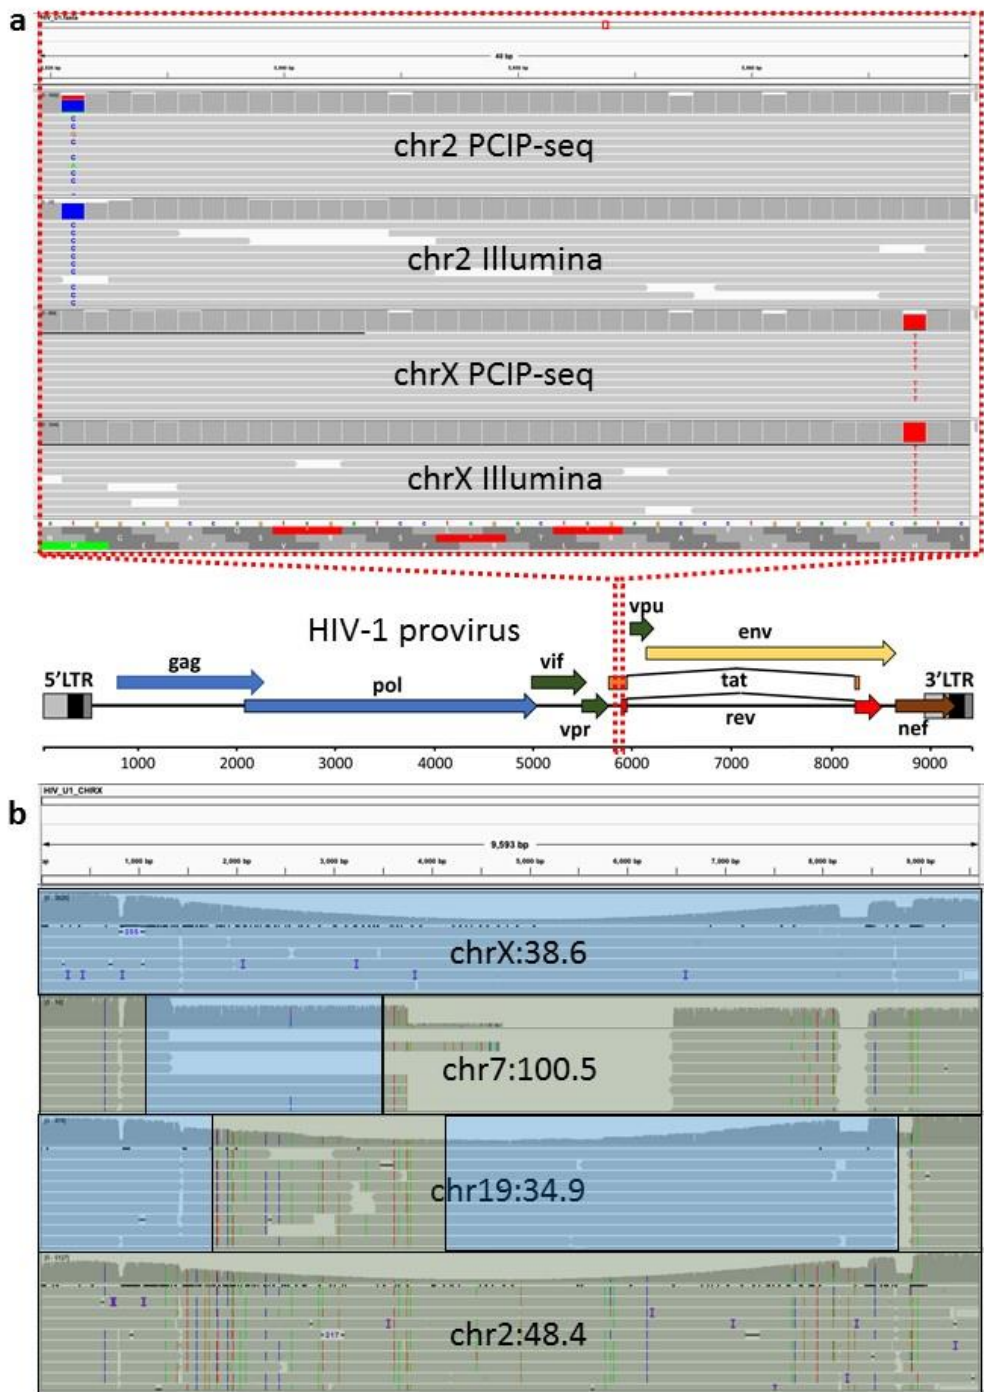

**Fig. S6** SNPs and recombination observed in the HIV-1 cell line U1 **(a)** Screen shot from IGV, representative PCIP-seq reads and clone specific PCR products sequenced on Illumina. This region corresponds to the first 13 amino acids of the Tat protein. In the chr2 provirus a T-to-C changes ATG to ACG and the first methionine to a threonine. In the chrX provirus an A-to-T changes CAT to CTT replacing a histidine at position 13 with a leucine. **(b)** Two proviruses, chr7:100.5 & chr19:34.9 identified as the products of recombination between major chrX and chr2 proviruses. IGV screen shot shows proviral reads from all four proviruses mapped to a full length proviral genome (the sequence of the chrX provirus was used as the reference). The colored vertical lines indicate SNPs and identify sequences derived from the chr2 provirus, highlighted in green. Sequences originating from the chrX provirus is highlighted in blue. Sequences of the provirus from chr19 and chr7 that match either chrX or chr2 provirus are highlighted in the appropriate color.

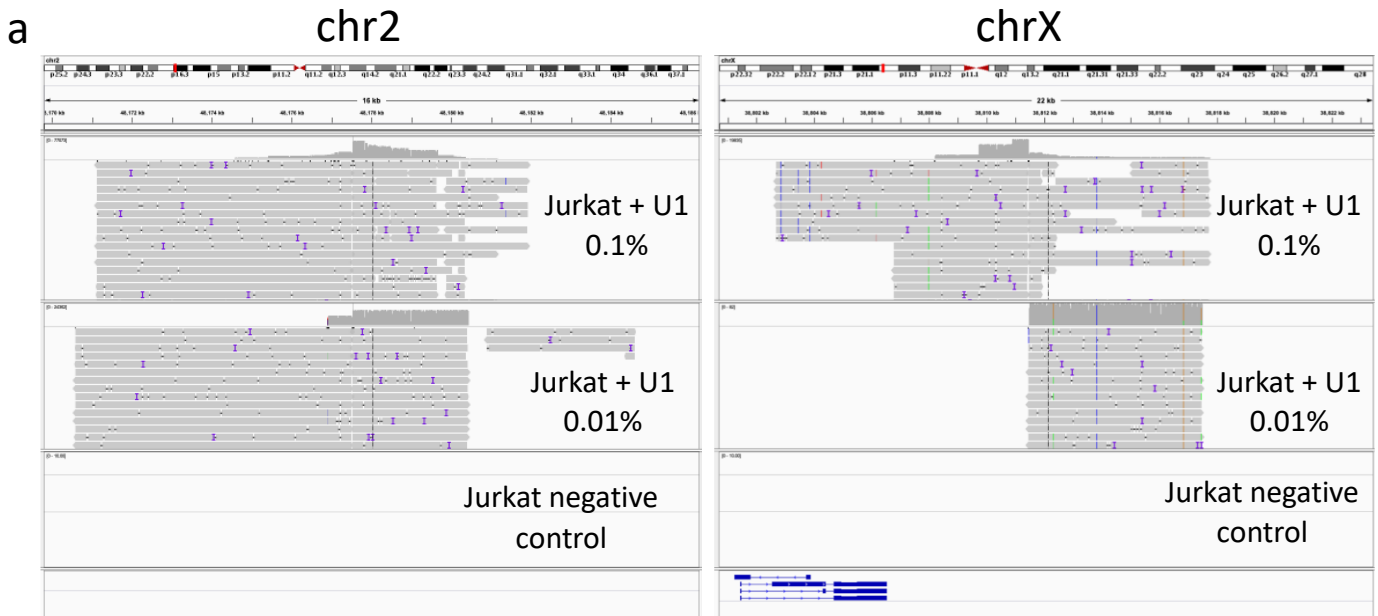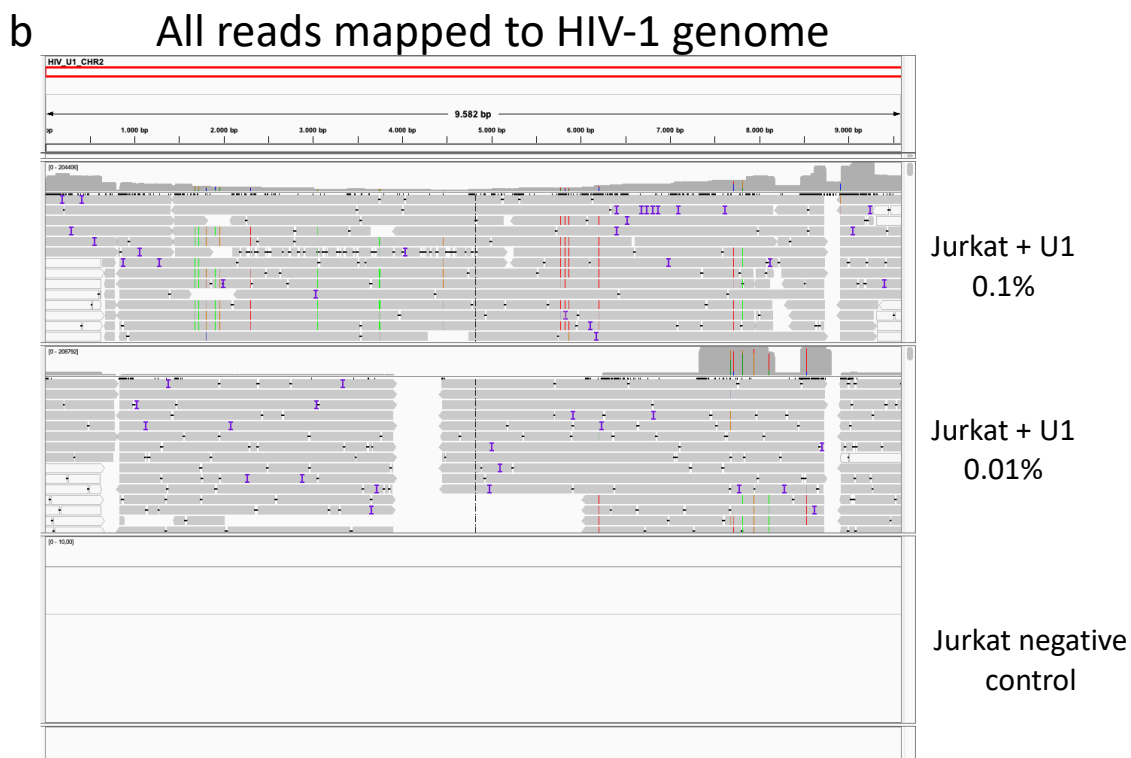

**Fig. S7** Three PCIP-seq libraries were prepared in parallel using 5  $\mu$ g of template DNA, all used the same guides and primers. Following sequencing and demultiplexing the Jurkat negative control produced 12,137 reads, Jurkat + U1 0.01% produced 234,421 reads and Jurkat + U1 0.1% 252,913 reads. **(a)** The resultant reads were mapped to the human genome, the major integration sites observed in U1 on chr2 and chrX are shown. **(b)** The reads were also mapped the HIV-1 genome. No reads of pure HIV-1 or chimeric HIV-1/host reads were observed in the Jurkat negative control. In Jurkat + U1 0.01% samples 12.6% of the reads were chimeric HIV-1/host, in Jurkat + U1 0.1% this rose to 43.2%. Red box at top indicates level of zoom on provirus.

This experiment gives us a rough estimation of the efficiency of PCIP-seq. In the dilution experiment, we started with 5  $\mu$ g of DNA. Assuming a diploid human genome size of 6.51 picograms this should equate to the DNA of approximately  $\sim$ 768,000 cells. At 0.01% the DNA from approximately  $\sim$ 77 U1 cells is present. This corresponds to  $\sim$ 154 proviruses as U1 contains two proviruses per cell (these numbers are probably inflated as cell lines often display extensive aneuploidy). Following circularization, the CRISPR cut and reaction clean-up, we are left with approximately  $\sim$ 12% of the DNA we started with, dropping the number of U1 genomes represented in the DNA to  $\sim$ 9, or  $\sim$ 18 proviruses. As can be seen from the resultant library we are able to identify

both the proviruses in U1 and in the case of the provirus on chr2 we observe amplification from 4 molecules based on observing different shear sites. This means we captured 5 proviruses, this equates to an efficiency of 3.2%.

**a** chr17:67160669-67160669

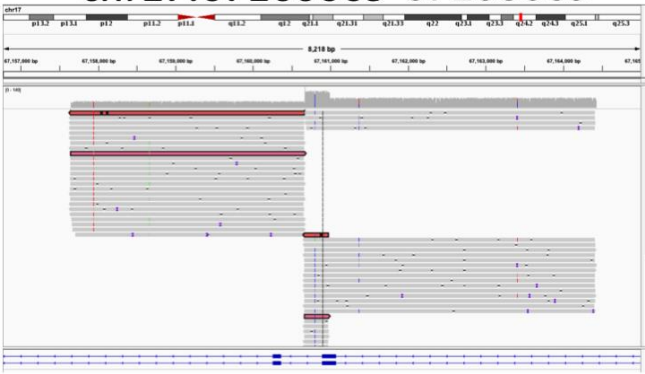

HIV-1

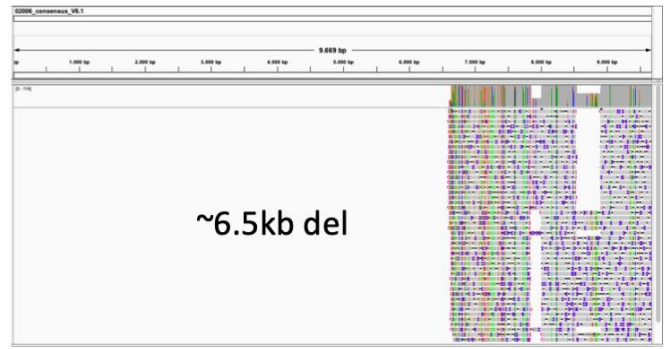

**b**

Clone specific PCR

PCIP-seq reads

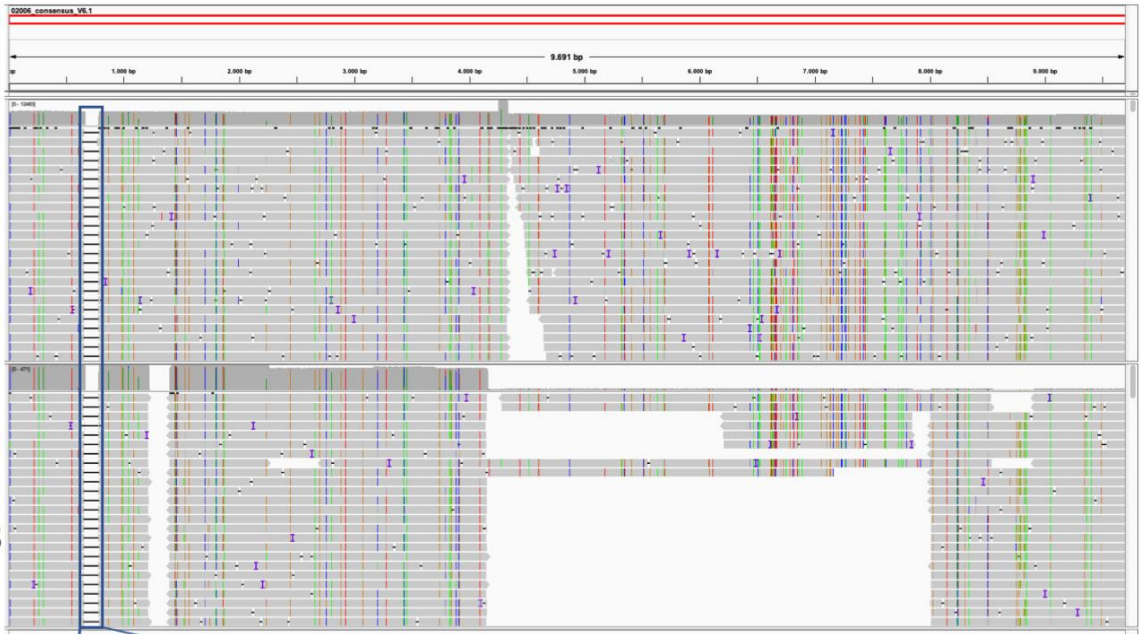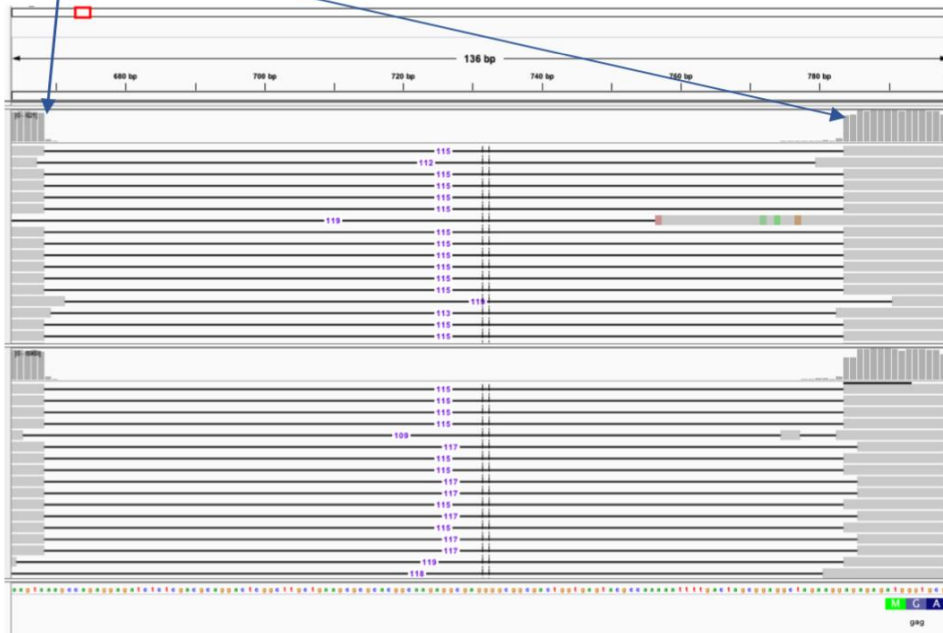

C

### Provirus with 5' deletion chr10:119577391-119577407

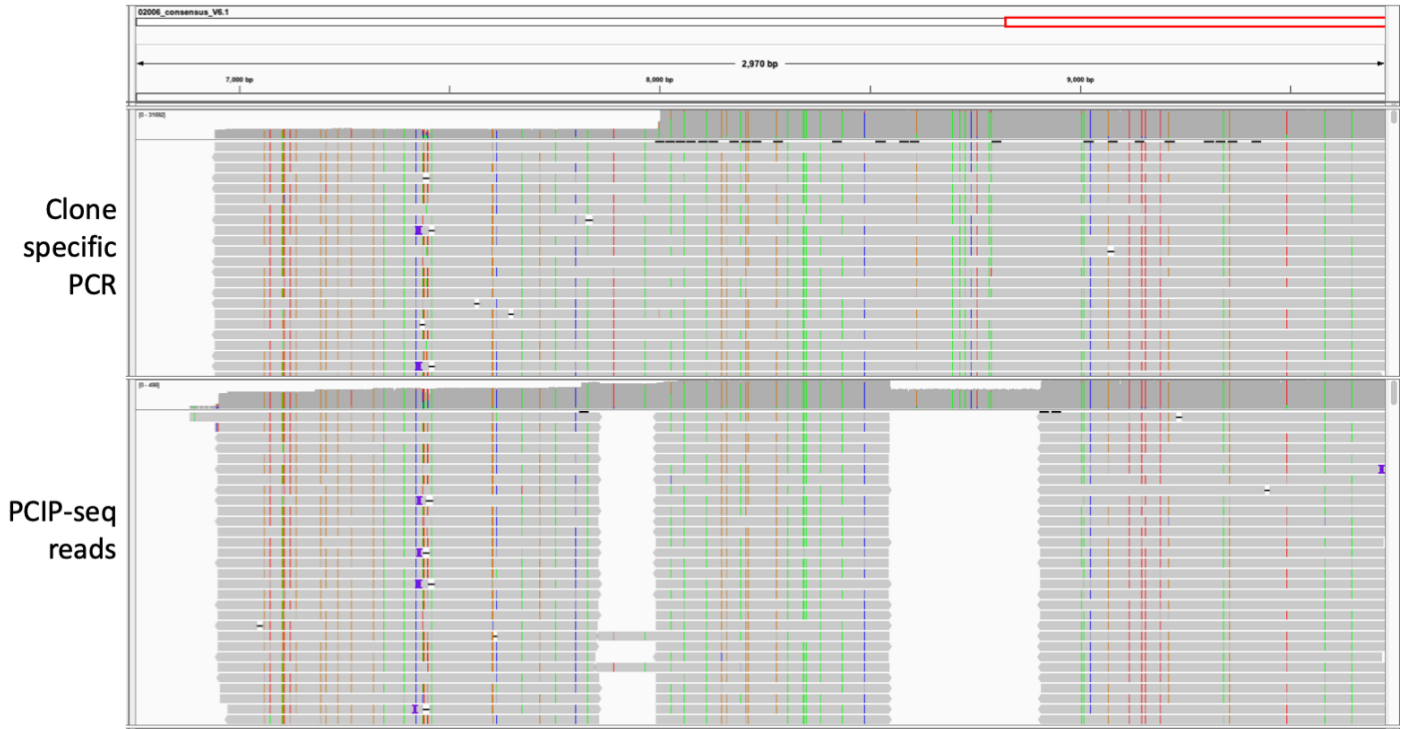

### Provirus with 3' deletion chr11:128226471-128226471

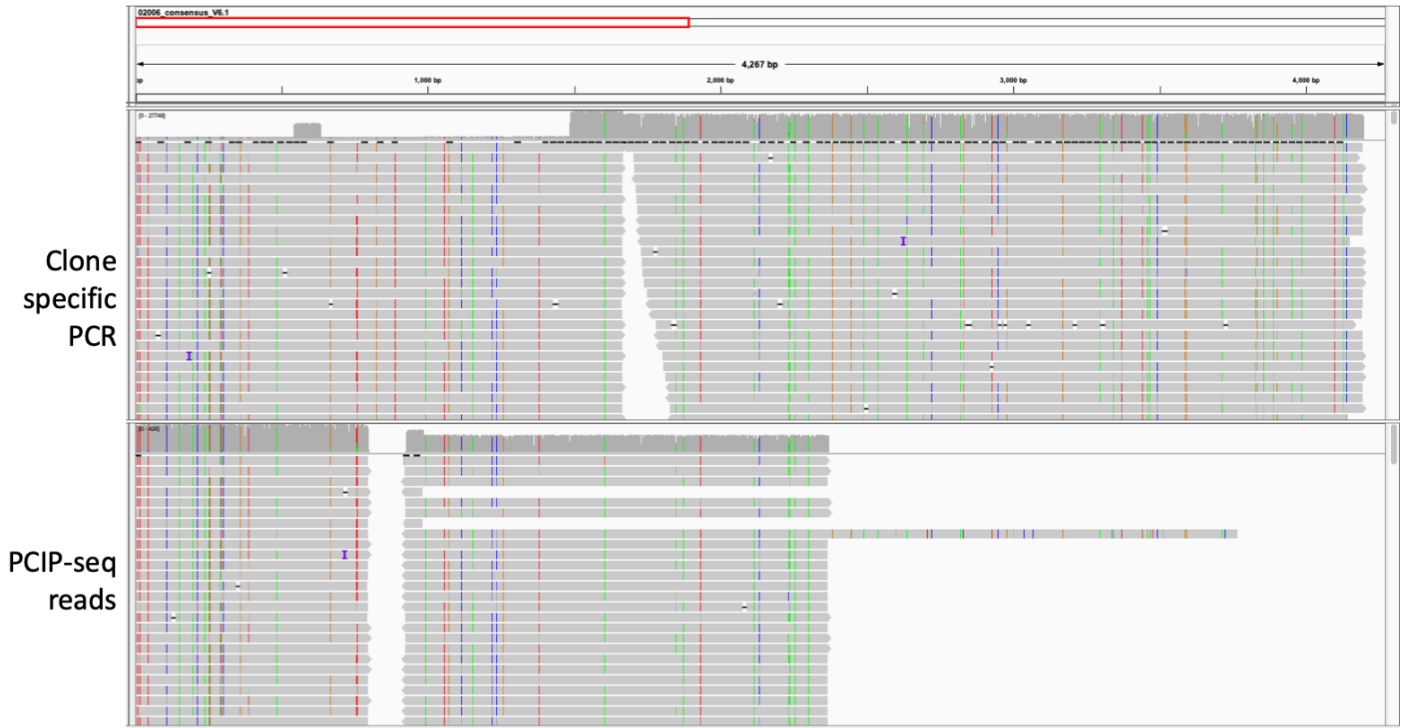

**d****Provirus chr9:20608766-20608771**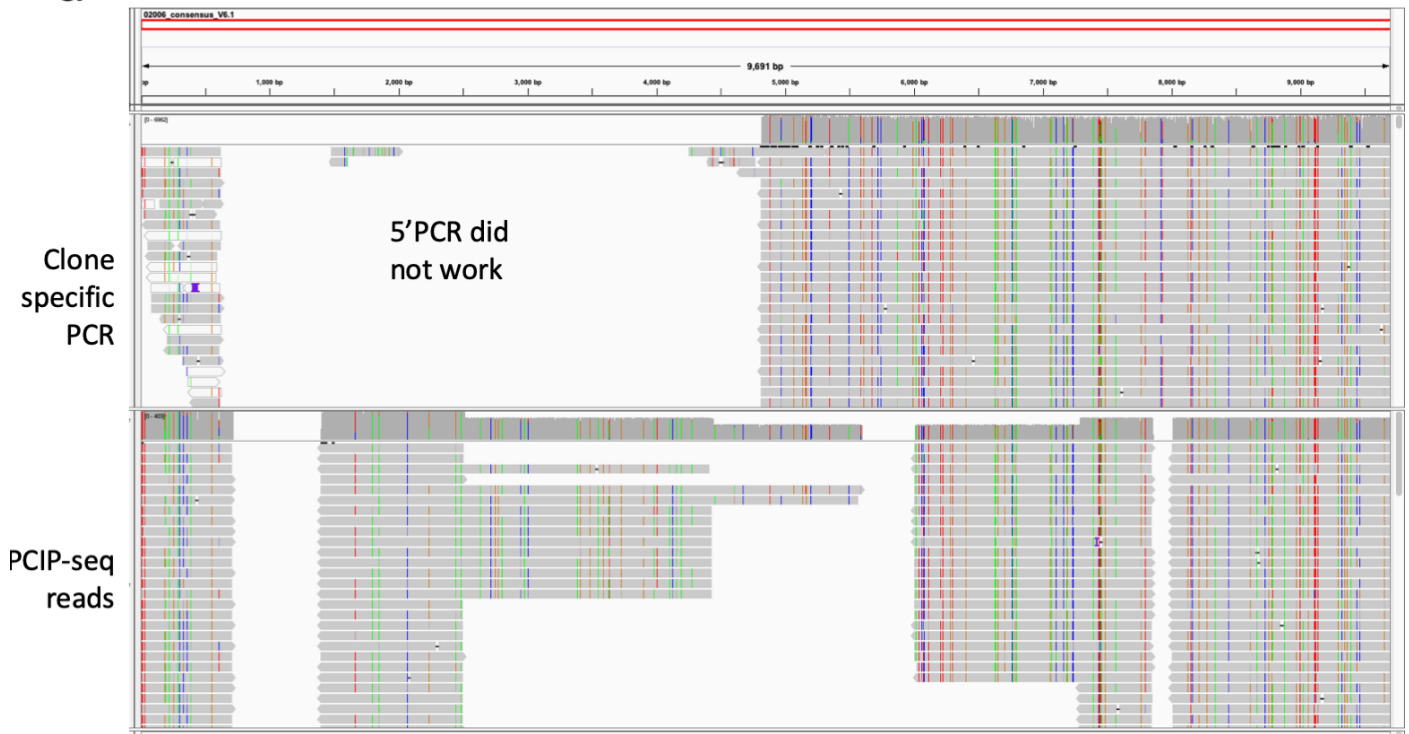**Provirus chr11:119279088-119279144**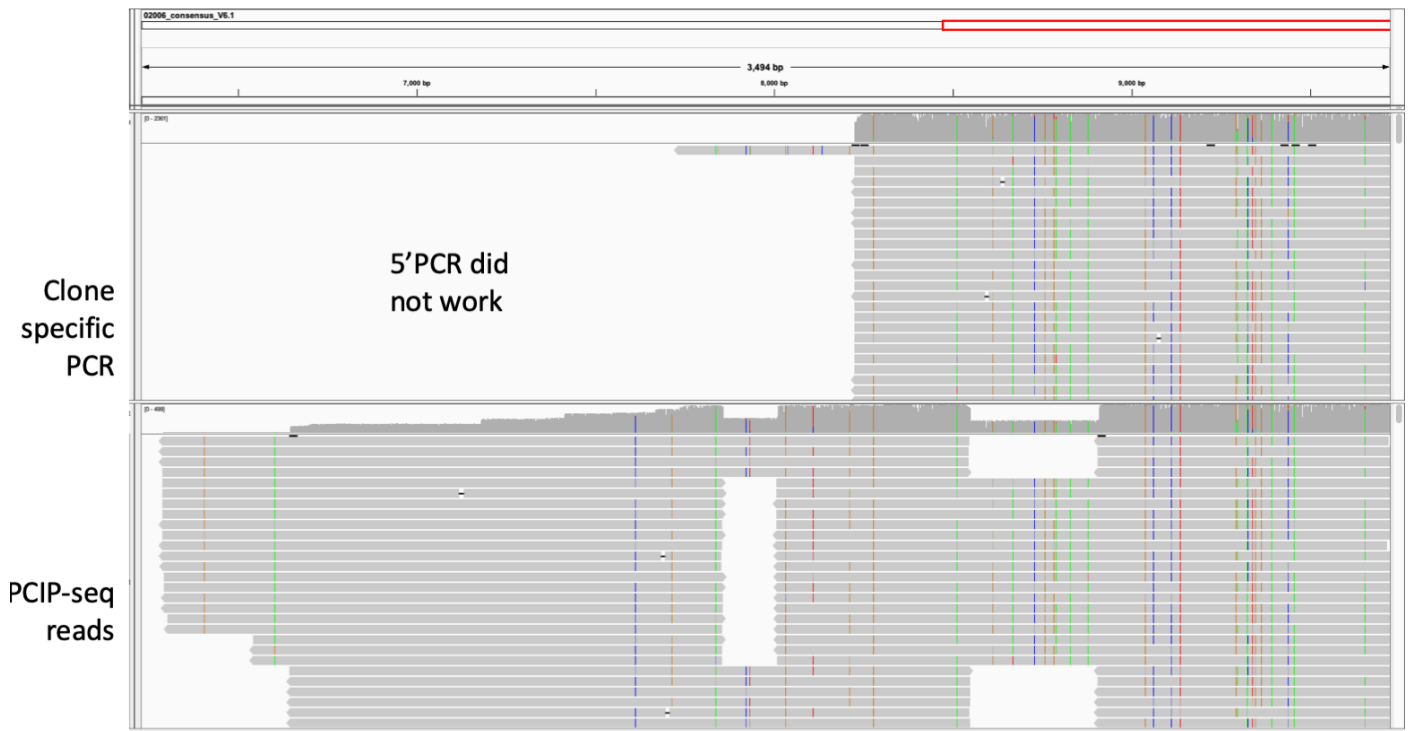

**Fig. S8** Examples of HIV-1 proviruses from patient 02006 **(a)** Screen shot from IGV shows a proviral integration site in the host genome as well as the associated provirus sequence. Two reads have been highlighted (out of many) that are found both upstream and downstream of the provirus integration site. With a full-length provirus this would not be possible, however, with a provirus carrying a large deletion including the 5' or 3' regions targeted by the guides a single read can encompass the truncated provirus as well as host DNA from both upstream and downstream of the integration site. The provirus associated with this integration site has a 5' deletion that removes ~6.5kb. **(b)** Reads from the provirus inserted in chr16:29362672-29362679 mapped to the 02006 HIV-1 consensus sequence. Red box at top indicates level of zoom on provirus. This provirus has a ~115 bp deletion affecting the region containing the packaging signal ( $\Psi$ ). This provirus was also

amplified via clone specific PCR. In addition to the ~115 bp deletion the SNPs in the clone specific PCR mirror those observed from the PCIP-seq library. The elevated coverage towards the middle is where the two PCR products overlap. **(c)** Large deletions affecting both the 5' and 3' end of the provirus were frequently observed. Shown are reads from both PCIP-seq and clone specific nested PCR mapped to the 02006 HIV-1 consensus sequence. The pattern of SNPs in the clone specific PCR mirrors those observed from the PCIP-seq library **(d)** Partial conformation of two proviruses. In both cases the nested PCR for the 5' end did not work. The provirus at chr9:20608766-20608771 appears full length, the provirus at chr11:119279088-119279144 appears to have a 5' deletion. Pattern of SNPs in the clone specific PCR again mirrors those observed from the PCIP-seq library.



# ERV insertion in the APOB gene

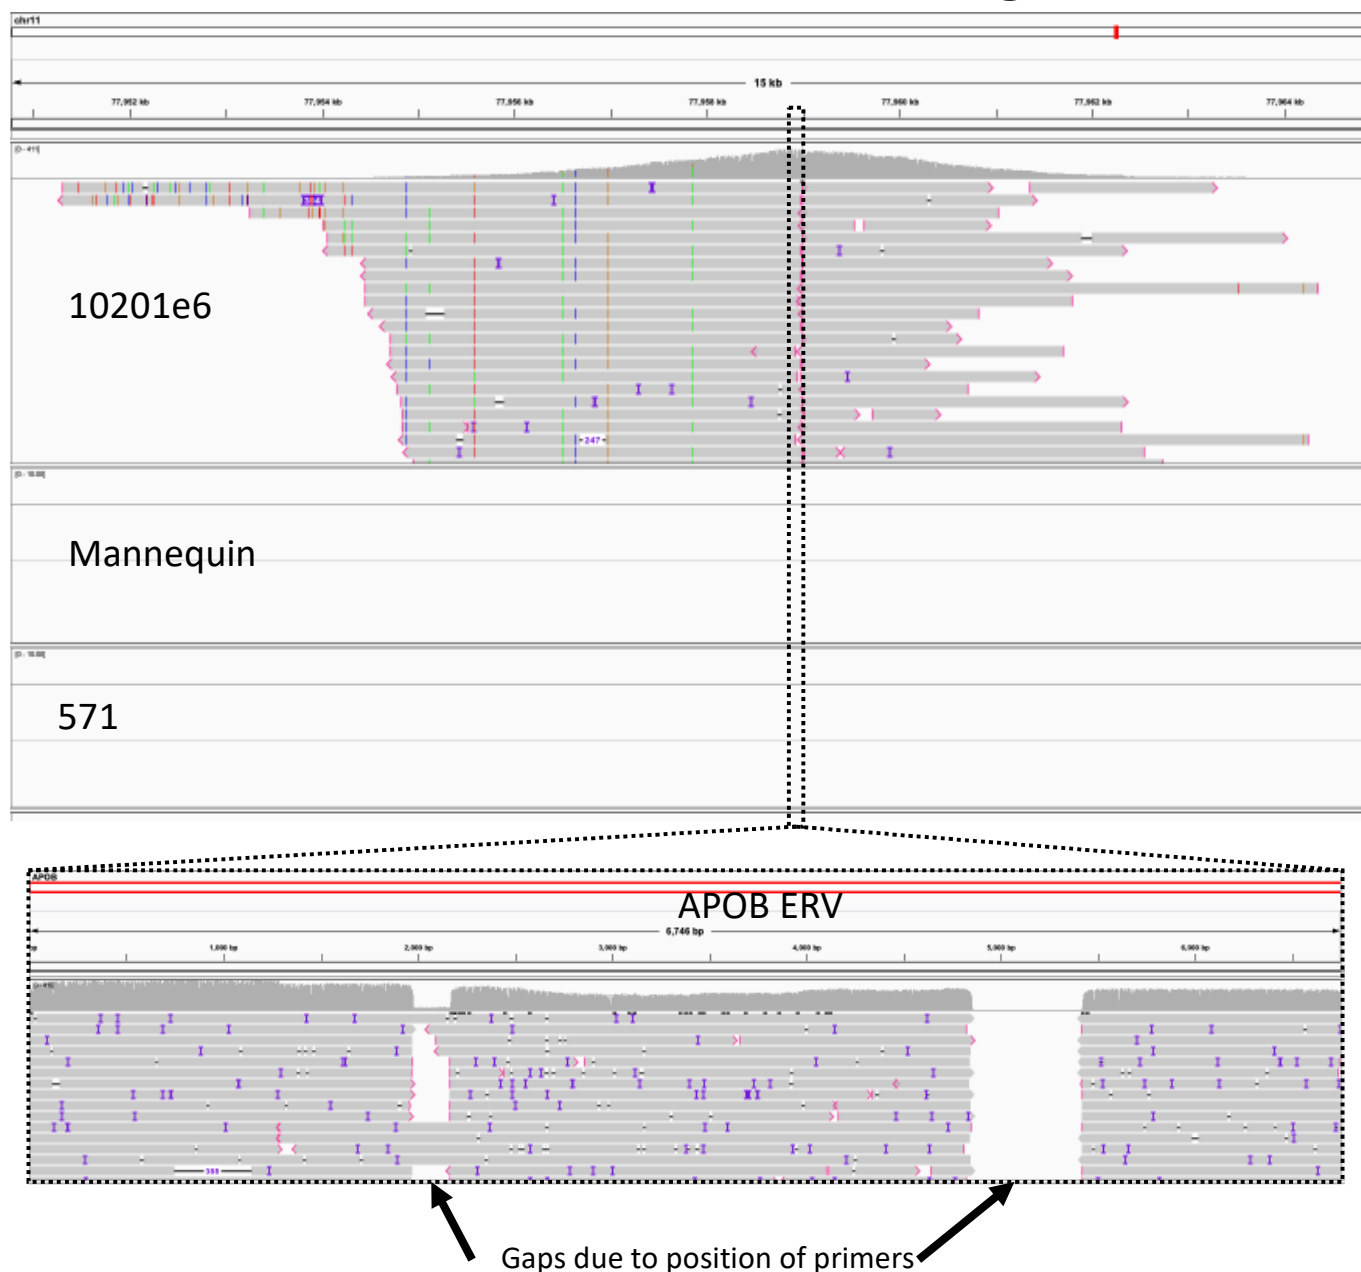

**Fig. S9** Screen capture from IGV: PCIP-seq identified the insertion site of the ERV responsible for cholesterol deficiency in Holstein cattle. No reads are seen mapping to this position in libraries from the other two cattle (Mannequin & 571). Below is shown the partial sequence of the provirus.

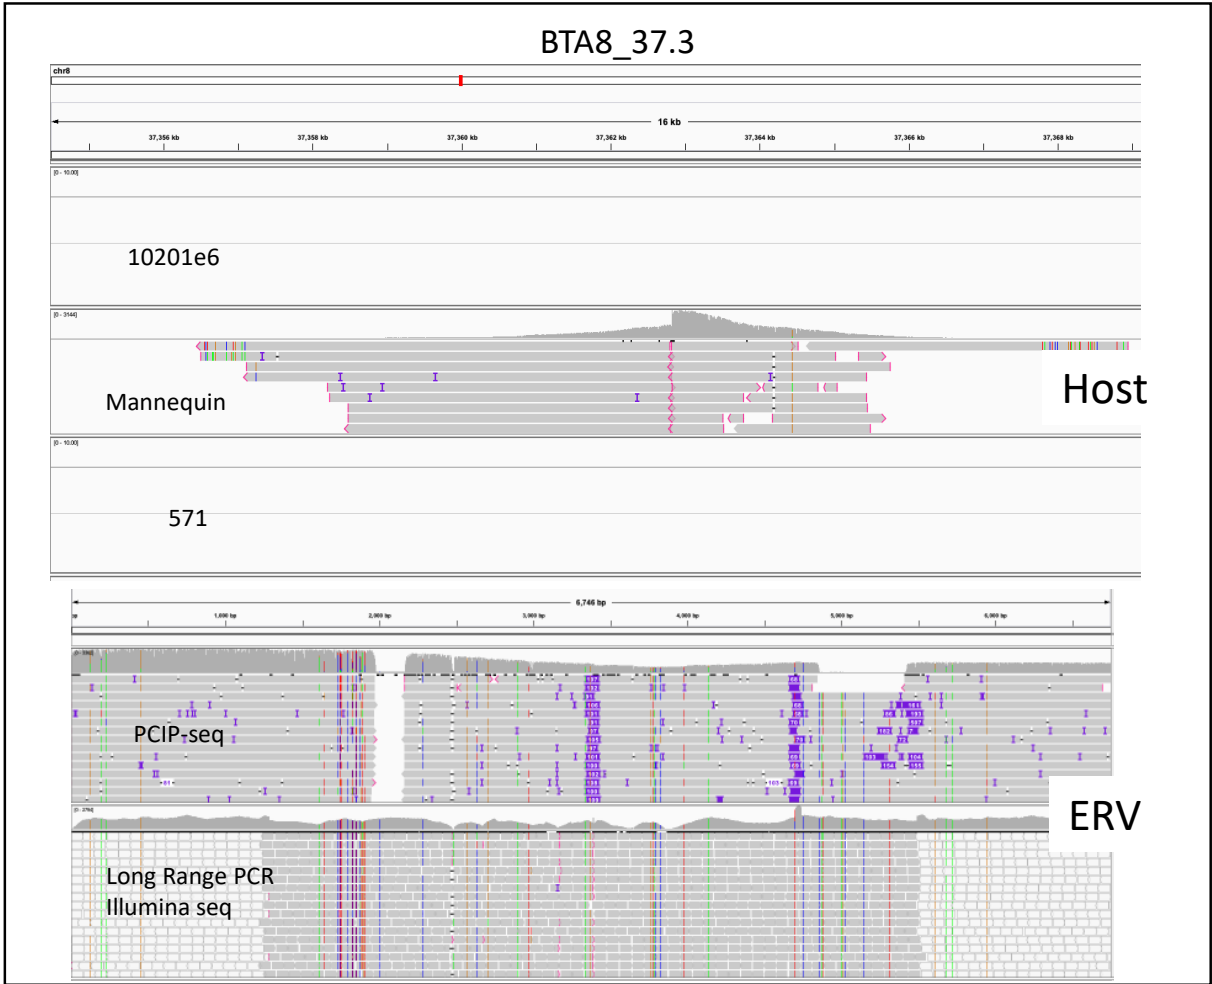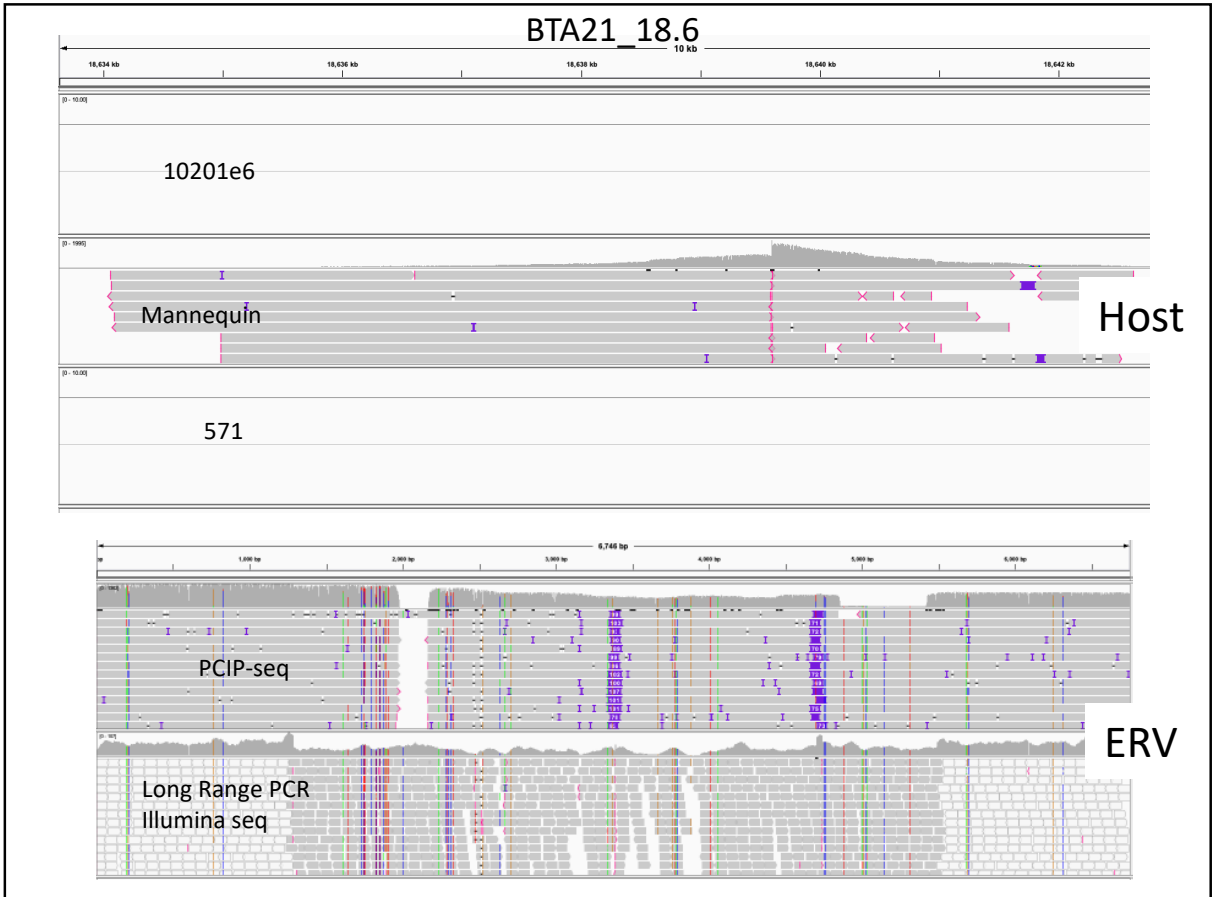

**Fig. S10** Validated, Bovine endogenous retrovirus (BERVK2) identified via PCIP-seq.

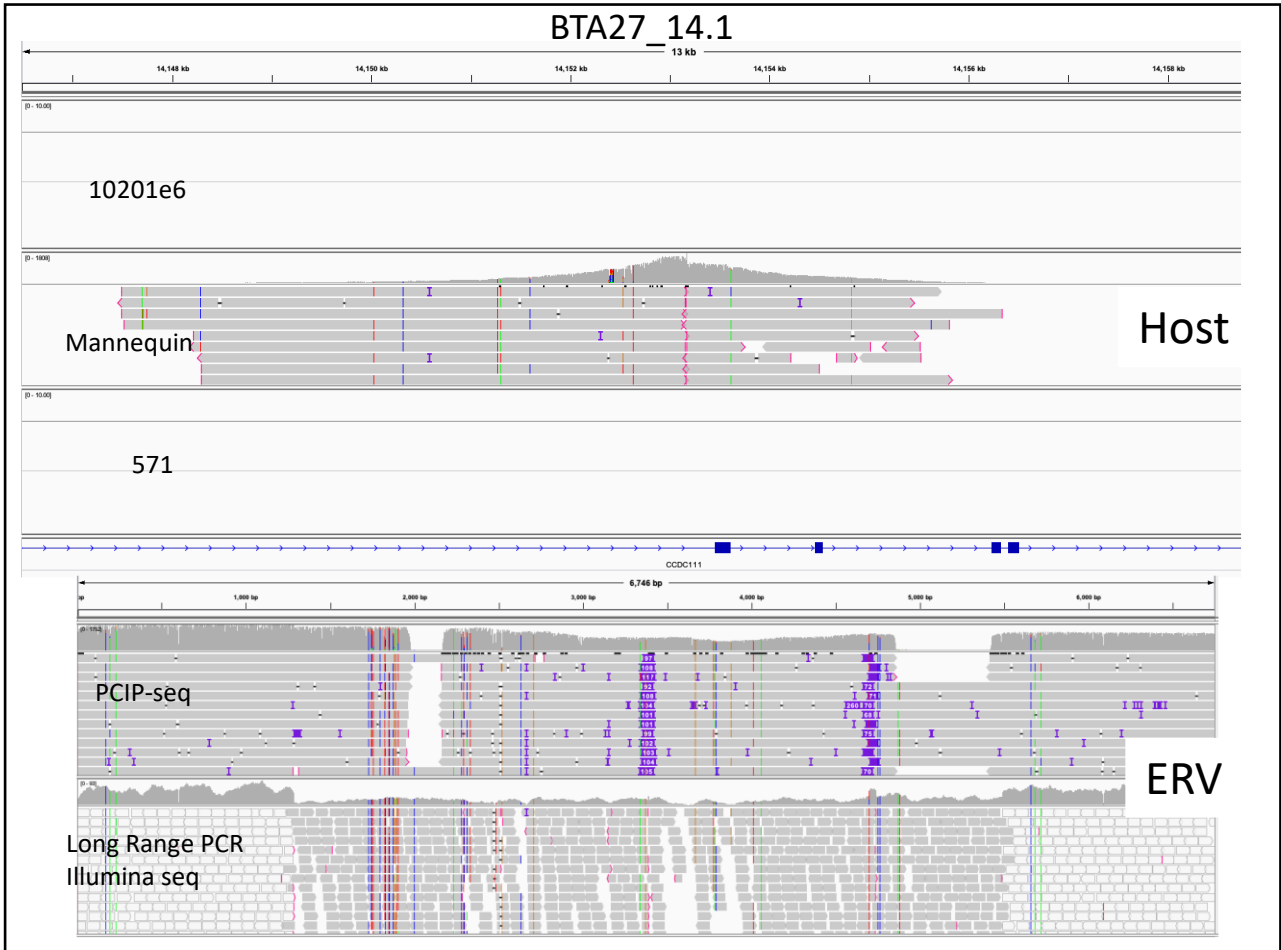

Fig. S10 continued

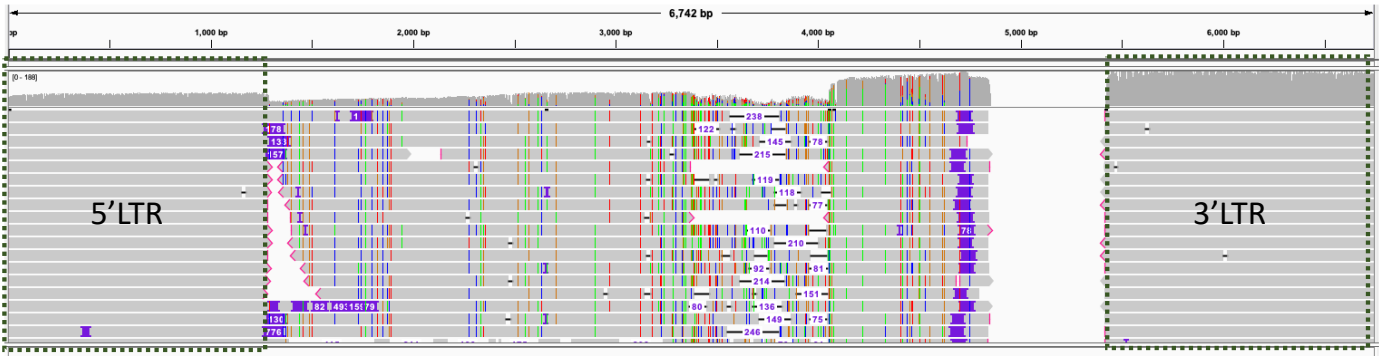

**Fig. S11** ERV BTA3\_115.3 LTRs match APOB (BTA11\_77.9) ERV.

**a**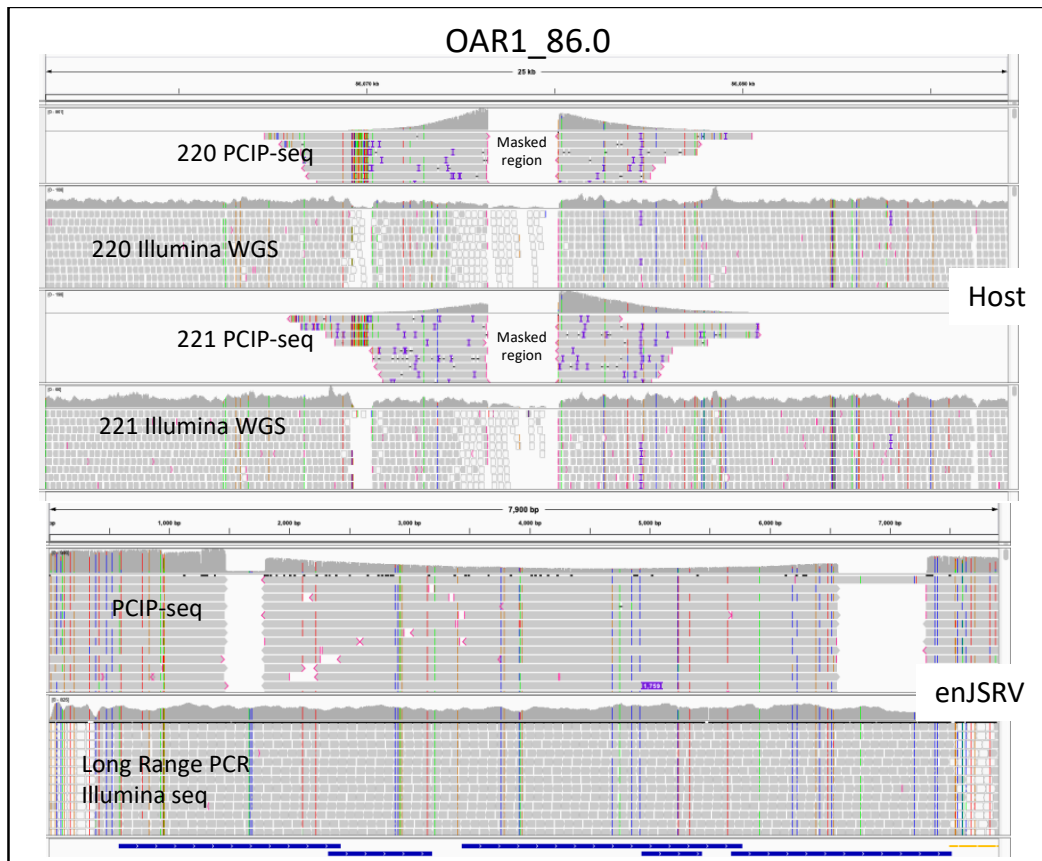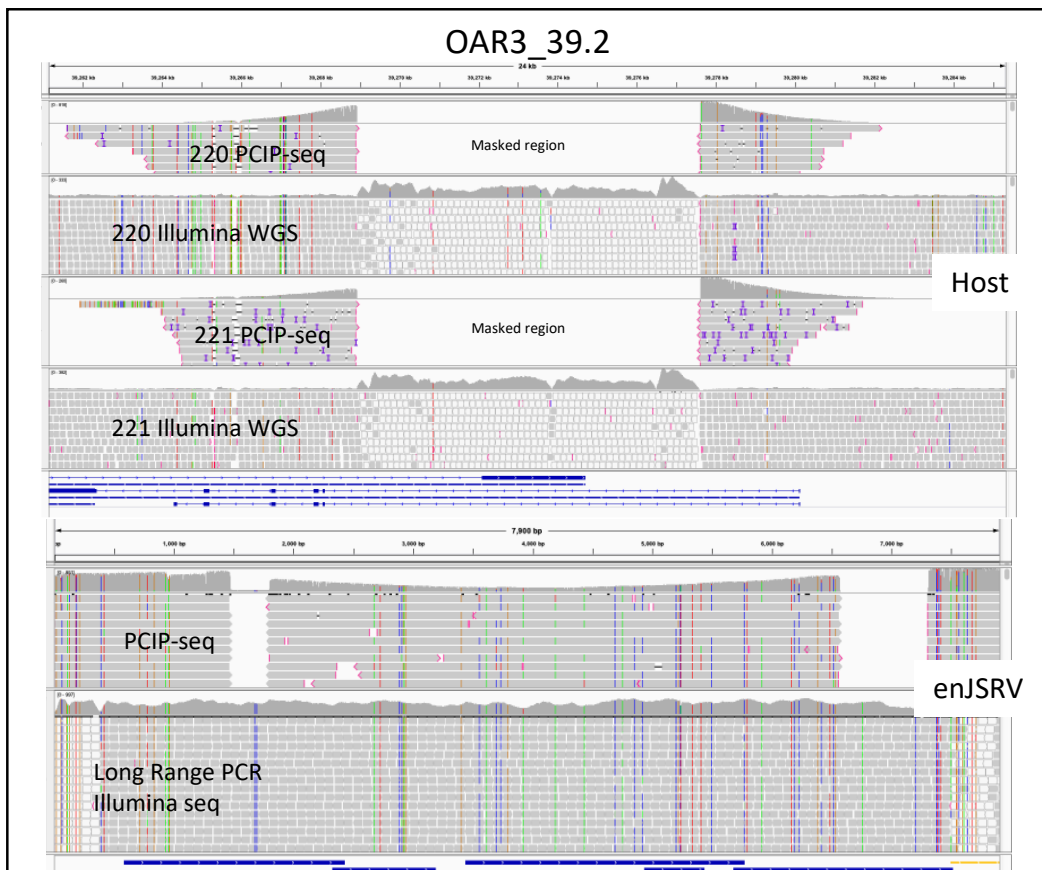

**Fig. S12** Validated, enJSRV **(a)** The PCIP-seq reads were mapped to the reference genome (OAR3) where sequences matching enJSRV had been masked out, this preventing reads from multiple proviruses mapping to these positions. Hybrid reads in the unique flanking sequence allowed us to determine the sequence of the proviruses present at these locations (WGS = Whole genome sequencing). **(b)** Evidence of enJSRV insertion was also observed in Illumina WGS data from both animals. Colors, flag reads where one end is mapping to another region in the genome, pointing to an insertion at that position.

**b**

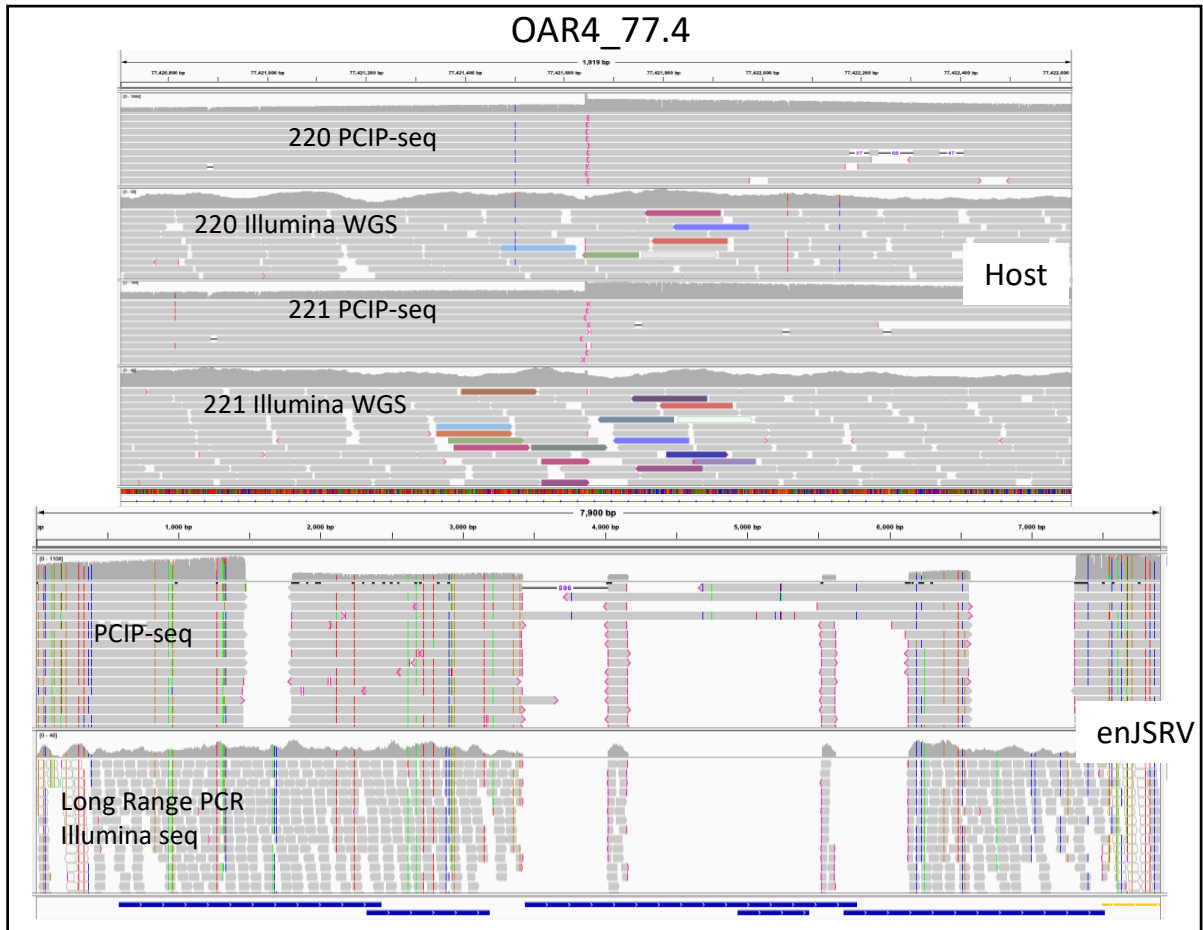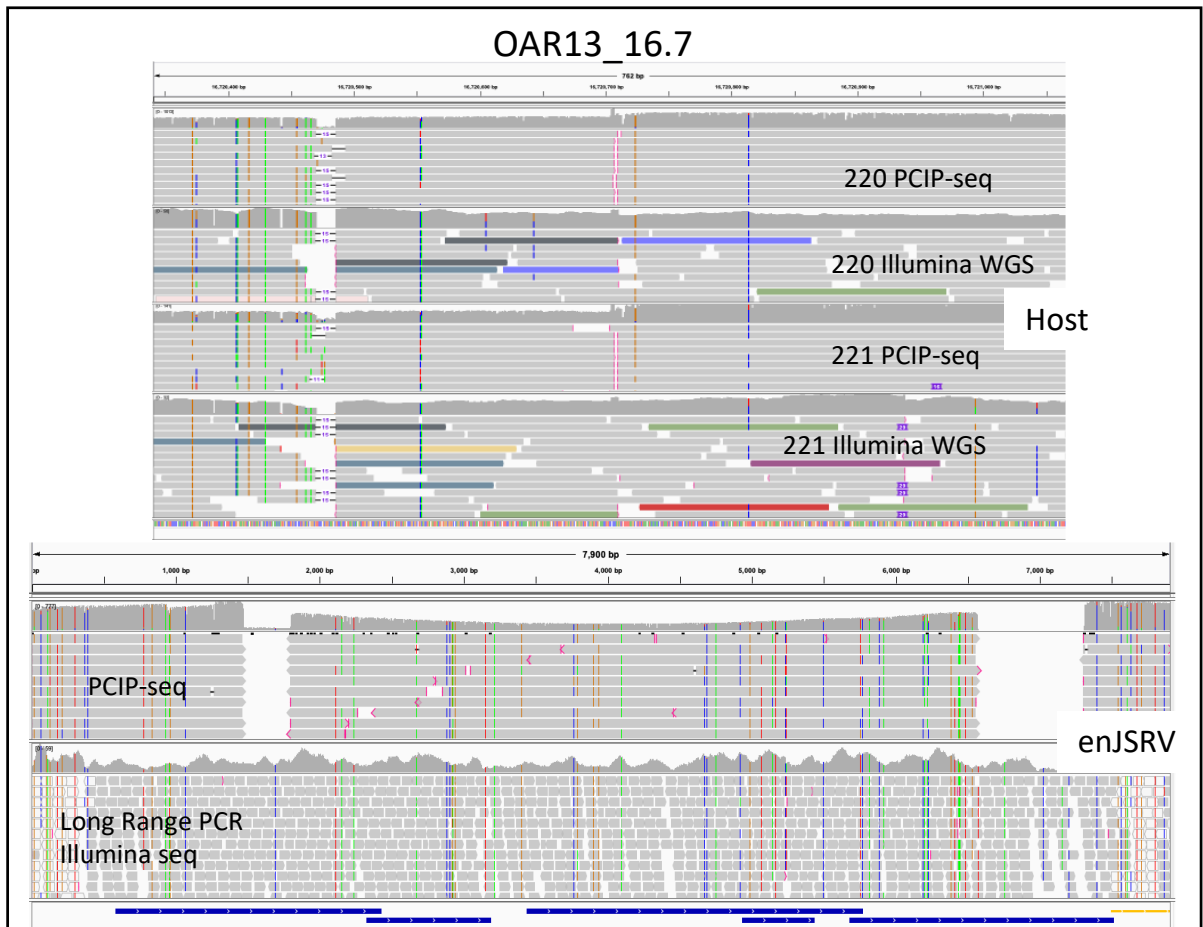

**Fig. S12 continued**

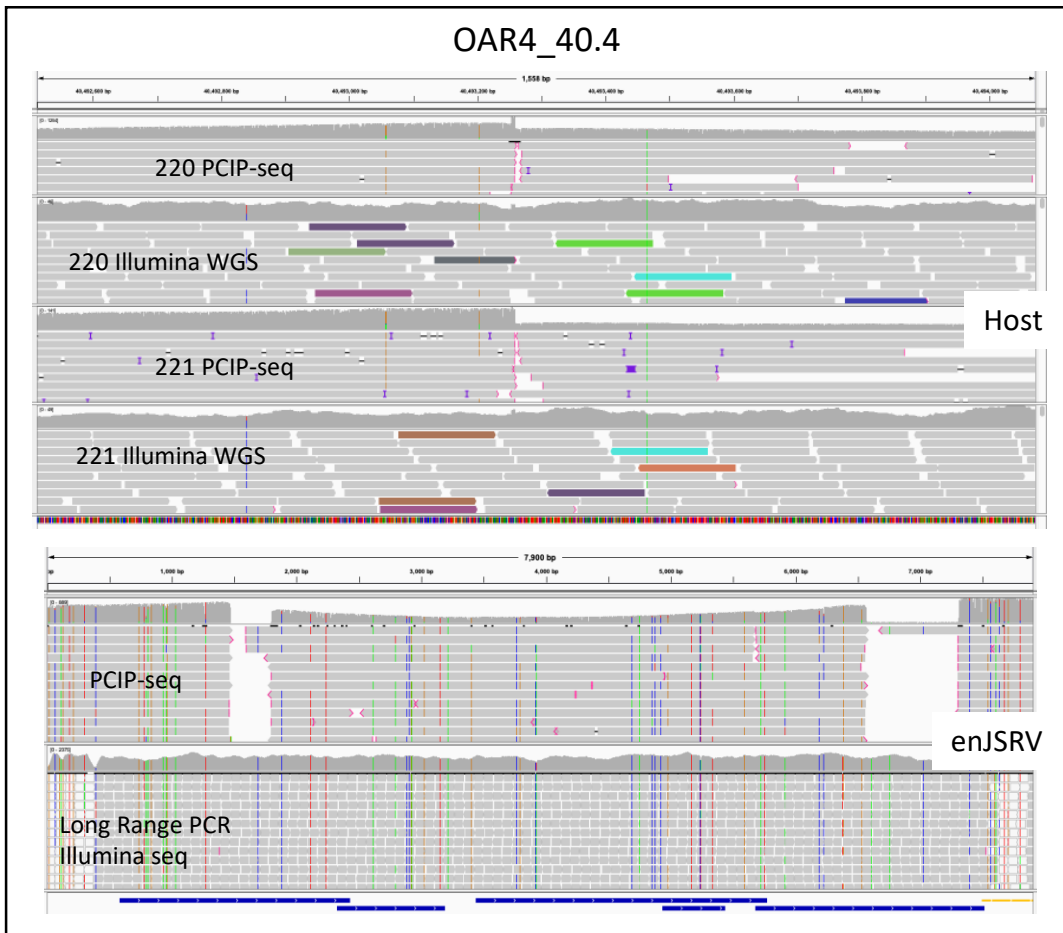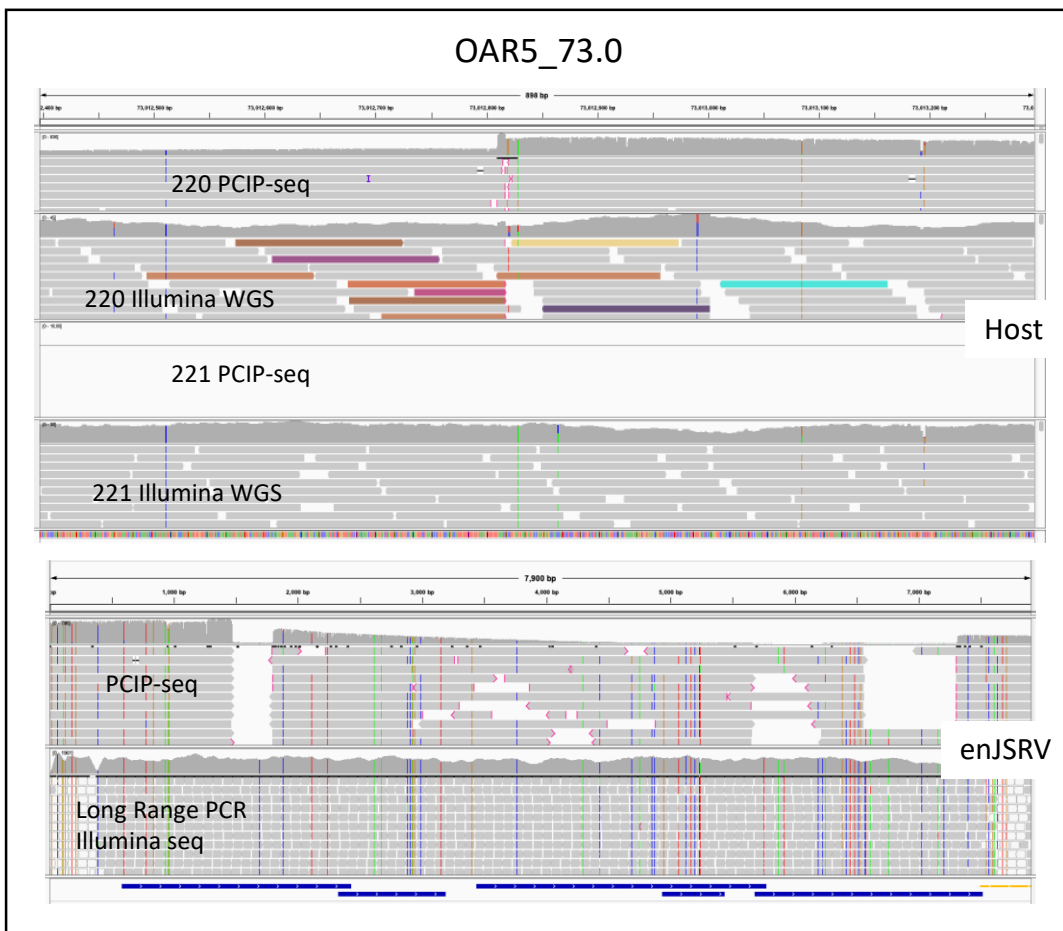

Fig. S12 continued

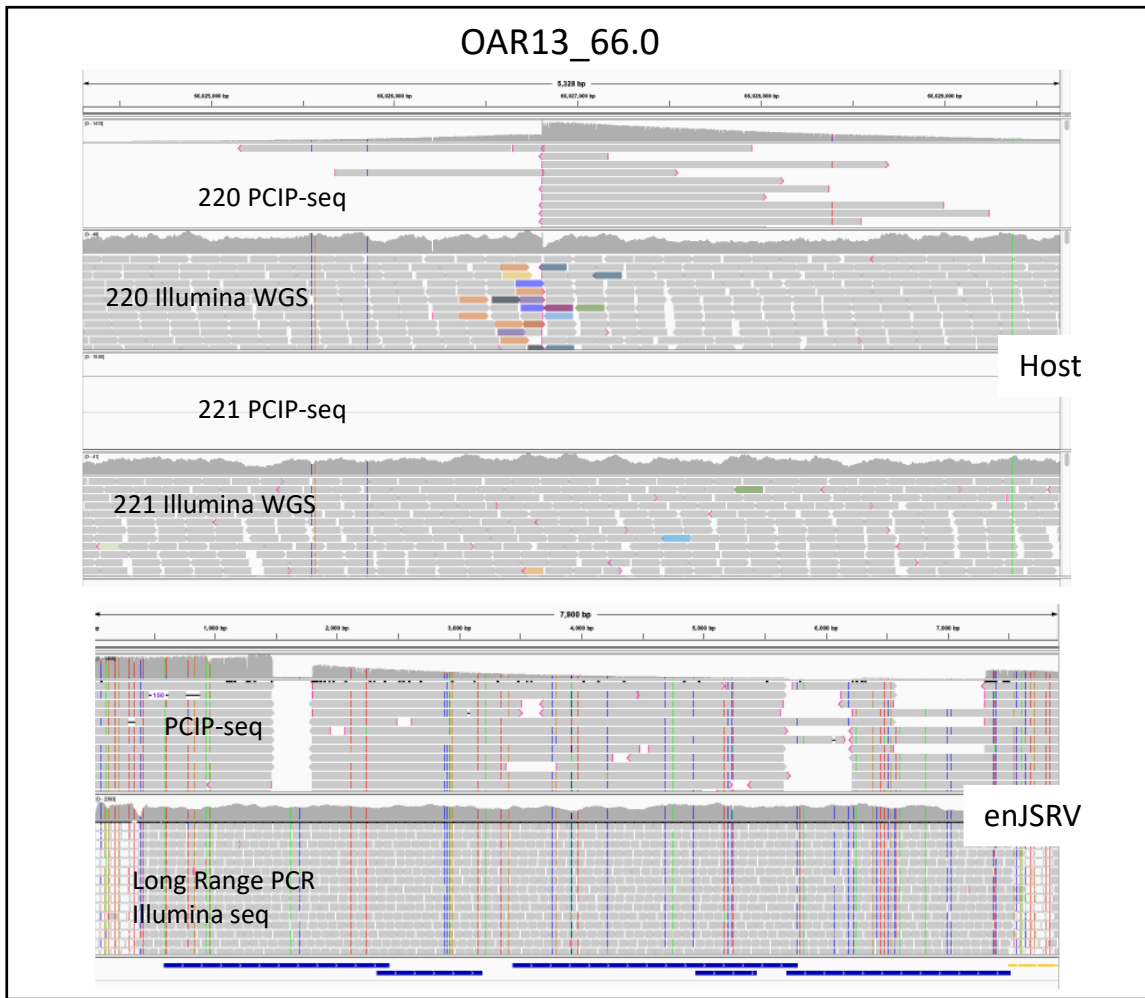

**Fig. S12 continued**



**Table S1**

| Sample       | Insertion sites ILLUMINA | Insertion sites PCIP-seq | U-IS ILL. in PCIP (%) | Pearson Correlation | U-IS PCIP in ILL. (%) | Insertion sites ILLUMINA (>3) | Insertion sites PCIP-seq (>3) | U-IS ILL. in PCIP (%) (>3) | U-IS PCIP in ILL. (%) (>3) | Raw PCIP-seq reads | Raw Illumina reads |
|--------------|--------------------------|--------------------------|-----------------------|---------------------|-----------------------|-------------------------------|-------------------------------|----------------------------|----------------------------|--------------------|--------------------|
| 233          | 1110                     | 5311                     | 81.2                  | 0.950               | 12.1                  | 448                           | 2302                          | 85.9                       | 7.7                        | 524698             | 173196             |
| 221 (022016) | 1122                     | 8023                     | 40.4                  | 0.512               | 4.8                   | 74                            | 3546                          | 50                         | 0.4                        | 180276             | 9579               |
| 221 (032014) | 4473                     | 5374                     | 44.4                  | 0.526               | 40.5                  | 1555                          | 1524                          | 34.9                       | 14.5                       | 32266              | 391478             |
| 220          | 915                      | 1352                     | 36.1                  | 0.895               | 27.9                  | 401                           | 664                           | 47.6                       | 16.3                       | 44876              | 299554             |
| 1439         | 5784                     | 5773                     | 47.7                  | 0.895               | 44.5                  | 1449                          | 3053                          | 63.9                       | 15.0                       | 181055             | 216525             |
| 560          | 379                      | 172                      | 15.8                  | 0.617               | 14.6                  | 81                            | 77                            | 33.3                       | 11.1                       | 6802               | 192170             |
| 1053         | 8496                     | 17903                    | 62.0                  | 0.811               | 29.1                  | 2196                          | 7777                          | 68.5                       | 7.3                        | 367454             | 219461             |

Comparing PCIP-seq to ligation mediated PCR and Illumina sequencing.

For the Illumina libraries the template DNA used was 4 µg. For the PCIP-seq it varied between libraries (233=7µg, 221(022016)=4µg, 221(032014)=4µg, 220=2µg, 1439=3µg, 560=1µg, 1053=6µg). >3 signifies insertion sites supported by more than 3 reads after PCR duplicate removal. ILLUMINA = Ligation mediated PCR with Illumina sequencing. U-IS ILL. in PCIP = Unique insertion sites (%) identified in ILLUMINA and also found in PCIP-seq. U-IS PCIP in ILL = Unique insertion sites (%) identified in PCIP-seq and also found in ILLUMINA. Pearson's correlation Abundance = correlation of abundances from proviruses detected in both Illumina and PCIP-seq.

**Table S2**

| Sample name  | Species | PVL  | # Insertion sites | # Proviruses examined for SNPs | # Variants detected (AF > 0.6) | # Proviruses with variant (AF > 0.6) | # Positions within proviruses with variant (AF > 0.6) |
|--------------|---------|------|-------------------|--------------------------------|--------------------------------|--------------------------------------|-------------------------------------------------------|
| 233          | OAR     | 78.3 | 5311              | 789                            | 233                            | 168                                  | 136                                                   |
| 221 (022016) | OAR     | 63.0 | 8023              | 408                            | 93                             | 79                                   | 86                                                    |
| 221 (032014) | OAR     | 16.0 | 5374              | 70                             | 6                              | 6                                    | 6                                                     |
| 220          | OAR     | 3.8  | 1352              | 130                            | 50                             | 42                                   | 36                                                    |
| 1439         | BosT    | 45.0 | 5773              | 587                            | 311                            | 211                                  | 137                                                   |
| 1053         | BosT    | 23.5 | 17903             | 1243                           | 241                            | 182                                  | 169                                                   |

Numbers of SNPs identified in each sample.

**Table S3**

| <b>1053</b>            |      |               |             |                    |
|------------------------|------|---------------|-------------|--------------------|
| Provirus               | Type | Region in BLV | Approx size | Clone specific PCR |
| 1_120275095_120275095  | DEL  | 230-252       | 22          | no                 |
| 1_147862114_147862122  | DEL  | 2241-2275     | 34          | no                 |
| 2_106933456_106933462  | DEL  | 7674-7708     | 34          | no                 |
| 3_6970332_6970339      | DEL  | 5109-6728     | 1619        | no                 |
| 3_90671155_90671163    | DEL  | 2608-2919     | 311         | no                 |
| 4_114867583_114867589  | DEL  | 4574-4637     | 63          | no                 |
| 5_25818093_25818100    | DEL  | 4482-4526     | 44          | no                 |
| 6_95273607_95273614    | DEL  | 4487-5537     | 1050        | no                 |
| 6_112133285_112133291  | DEL  | 5217-5368     | 151         | no                 |
| 10_101509344_101509352 | DEL  | 7324-7425     | 101         | no                 |
| 12_36183673_36183673   | DEL  | 1808-1835     | 27          | no                 |
| 13_35328779_35328785   | DEL  | 3679-4603     | 924         | no                 |
| 15_24605050_24605054   | DEL  | 8136-8162     | 26          | no                 |
| 16_28380797_28380803   | DEL  | 2984-3895     | 911         | no                 |
| 17_64277037_64277043   | DEL  | 5418-5636     | 218         | no                 |
| 20_7882911_7882911     | DEL  | 8111-8137     | 26          | no                 |
| 20_7882911_7882911     | DEL  | 8230-8340     | 110         | no                 |
| 21_53434814_53434824   | DEL  | 6854-7130     | 276         | no                 |
| 21_53434814_53434824   | DEL  | 7202-7246     | 44          | no                 |
| 22_40343810_40343823   | DEL  | 4629-4838     | 209         | no                 |
| 22_48239823_48239830   | DEL  | 2271-2799     | 528         | no                 |
| 23_41760533_41760533   | DEL  | 8100-8201     | 101         | no                 |
| 24_22643966_22643974   | DEL  | 6857-7165     | 308         | no                 |
| 25_33749737_33749744   | DEL  | 4225-4264     | 39          | no                 |
| 28_28470239_28470248   | DEL  | 4496-5191     | 695         | no                 |
| 29_25146501_25146508   | DEL  | 3901-5251     | 1350        | no                 |
| X_33071616_33071616    | DEL  | 3322-3969     | 647         | no                 |
| X_61600607_61600612    | DEL  | 6193-6783     | 590         | no                 |

| <b>1439</b>           |      |               |             |                    |
|-----------------------|------|---------------|-------------|--------------------|
| Provirus              | Type | Region in BLV | Approx size | Clone specific PCR |
| 10_65013091_65013093  | DEL  | 2164-3192     | 1028        | no                 |
| 1_150385145_150385351 | DEL  | 3451-3474     | 23          | yes                |
| 2_121703720_121703726 | DEL  | 5350-5399     | 49          | no                 |
| 23_39892380_39892560  | DEL  | 2364-2560     | 196         | yes                |
| 2_4188067_4188067     | DEL  | 2176-2570     | 394         | no                 |
| 24_3748146_3748155    | DEL  | 5419-5497     | 78          | no                 |
| 27_36582809_36582809  | DEL  | 4522-5636     | 1114        | yes                |
| 27_36582809_36582809  | DEL  | 1-852         | 852         | yes                |
| 4_100234239_100234246 | INS  | 8296-8370     | 75          | yes                |
| 5_51456241_51456285   | DEL  | 1-4152        | 4152        | yes                |
| 2_124084208_124084213 | DEL  | 391-406       | 15          | yes                |
| 3_45576532_45576538   | DEL  | 2316-2336     | 20          | yes                |
| 5_95348339_95348346   | DEL  | 8167-8200     | 33          | no                 |
| 8_112613917_112613964 | DEL  | 4225-6244     | 2019        | no                 |
| 5_6307451_6307451     | INS  | 3251-3590     | 338         | no                 |

**221 (022016 & 032014)**

| Provirus                 | Type | Region in BLV | Approx size | Clone specific PCR |
|--------------------------|------|---------------|-------------|--------------------|
| OAR3_128671913_128671921 | DEL  | 4591-4620     | 30          | no                 |
| OAR18_26694984_26694991  | DEL  | 5287-5508     | 222         | no                 |
| OAR25_25097056_25097063  | DEL  | 2325-4303     | 1979        | yes                |
| OARX_110727773_110727797 | DEL  | 2858-2970     | 113         | no                 |
| OARX_78143793_78143801   | DEL  | 3284-6602     | 3298        | yes                |

**221 (032014)**

| Provirus                | Type | Region in BLV | Approx size | Clone specific PCR |
|-------------------------|------|---------------|-------------|--------------------|
| OAR14_25755878_25755884 | DEL  | 5846-6486     | 640         | no                 |

**221 (022016)**

| Provirus                 | Type | Region in BLV | Approx size | Clone specific PCR |
|--------------------------|------|---------------|-------------|--------------------|
| OAR1_25125478_25125485   | DEL  | 6237-6255     | 19          | no                 |
| OAR1_250672128_250672136 | DEL  | 7365-7389     | 25          | yes                |
| OAR2_73878244_73878251   | DEL  | 237-264       | 28          | no                 |
| OAR3_149619110_149619110 | DEL  | 7610-7726     | 117         | no                 |
| OAR3_211678275_211678275 | DEL  | 6228-6285     | 58          | no                 |
| OAR8_80161637_80161982   | DEL  | 6502-6561     | 60          | yes                |
| OAR13_10090846_10090865  | DEL  | 6484-6561     | 78          | no                 |
| OAR16_10037623_10037623  | DEL  | 1287-1396     | 110         | no                 |
| OAR21_31148897_31148902  | DEL  | 7292-7544     | 253         | no                 |
| OAR24_28280610_28280610  | DEL  | 6807-6828     | 22          | no                 |
| OAR2_242159705_242159712 | INS  | 7017-7232     | 215         | yes                |

**233**

| Provirus                 | Type | Region in BLV | Approx size | Clone specific PCR |
|--------------------------|------|---------------|-------------|--------------------|
| OAR10_34545991_34546003  | DEL  | 5298-5330     | 32          | yes                |
| OAR10_49266255_49266262  | DEL  | 6512-6586     | 74          | yes                |
| OAR14_42146250_42146256  | DEL  | 1658-1724     | 66          | no                 |
| OAR16_3998022_3998027    | DEL  | 4479-4706     | 227         | no                 |
| OAR19_37466567_37466573  | DEL  | 278-428       | 150         | no                 |
| OAR23_14140808_14140814  | DEL  | 3270-5878     | 2608        | no                 |
| OAR3_184106381_184106391 | DEL  | 5799-5874     | 75          | no                 |
| OAR7_72584331_72584331   | DEL  | 4574-5453     | 879         | no                 |
| OAR7_72649090_72649098   | DEL  | 539-629       | 90          | no                 |

BLV structural variants identified via PCIP-seq.

**Table S4**

|                                                  | 02006 | 06042 |
|--------------------------------------------------|-------|-------|
| Clinical characteristics                         |       |       |
| Age (years)                                      | 52    | 47    |
| Gender                                           | Male  | Male  |
| Time of diagnosis (year)                         | 2002  | 2006  |
| Viral load zenith (log <sub>10</sub> HIV-1 c/ml) | 5.45  | 5.65  |
| CD4 count, nadir (cells/mm <sup>3</sup> )        | 44    | 118   |
| Start of ART (year)                              | 2002  | 2009  |
| Total ART duration (years)                       | 15    | 8     |
| Time of sampling (year)                          | 2017  | 2017  |
| CD4 count at sampling (cells/mm <sup>3</sup> )   | 293   | 659   |
| Viral load at sampling (HIV-1 c/ml)              | <50   | <50   |
| CD4/CD8 ratio at sampling                        | 0.33  | 0.56  |
| Virological markers                              |       |       |
| Total HIV-1 DNA (c/10 <sup>6</sup> CD4 T-cells)  | 4644  | 5648  |

Clinical information for the HIV-1 patients

**Table S5**

| #  | Approximate location in genome (BTA6) | Provirus name | 10201e6 | Mannequin | 571 | Provirus |
|----|---------------------------------------|---------------|---------|-----------|-----|----------|
| 1  | chr1:108,822,892-108,832,262          | BTA1_108.8    | no      | no        | YES | Full     |
| 2  | chr1:140,473,236-140,486,732          | BTA1_140.4    | YES     | no        | YES | Full     |
| 3  | chr2:7,341,443-7,349,776              | BTA2_7.3      | no      | no        | YES | Full     |
| 4  | chr2:68,574,688-68,583,604            | BTA2_68.5     | YES     | no        | no  | Partial  |
| 5  | chr2:108,763,340-108,771,071          | BTA2_108.7    | no      | YES       | no  | Full     |
| 6  | chr2:136,856,893-136,860,100          | BTA2_136.8    | YES     | no        | no  | Full     |
| 7  | chr3:11,025,879-11,032,187            | BTA3_11.0     | no      | YES       | no  | Full     |
| 8  | chr3:21,243,379-21,247,173            | BTA3_21.24    | no      | YES       | no  | Full     |
| 9  | chr3:21,262,507-21,266,148            | BTA3_21.26    | no      | YES       | no  | Full     |
| 10 | chr3:115,305,677-115,313,191          | BTA3_115.3    | YES     | no        | no  | Full*    |
| 11 | chr4:23,529,679-23,538,398            | BTA4_23.5     | YES     | no        | no  | Partial  |
| 12 | chr4:106,804,424-106,812,368          | BTA4_106.8    | no      | no        | YES | Full     |
| 13 | chr5:76,505,040-76,518,833            | BTA5_76.5     | YES     | YES       | YES | Full     |
| 14 | chr6:19,795,982-19,804,772            | BTA6_19.7     | YES     | YES       | YES | Full     |
| 15 | chr6:33,664,998-33,674,349            | BTA6_33.6     | YES     | no        | no  | Full     |
| 16 | chr6:93,979,584-93,984,028            | BTA6_93.9     | YES     | YES       | YES | Partial  |
| 17 | chr7:18,507,208-18,514,234            | BTA7_18.5     | no      | YES       | no  | Partial  |
| 18 | chr7:62,318,935-62,329,558            | BTA7_62.3     | YES     | no        | no  | Full     |
| 19 | chr7:109,501,965-109,512,061          | BTA7_109.5    | YES     | no        | YES | Full     |
| 20 | chr8:16,410,224-16,424,259            | BTA8_16.4     | YES     | no        | YES | Full     |
| 21 | chr8:37,357,029-37,369,016            | BTA8_37.3     | no      | YES       | no  | Full     |
| 22 | chr8:67,963,331-67,972,754            | BTA8_67.9     | no      | YES       | no  | Full     |
| 23 | chr8:81,237,785-81,244,766            | BTA8_81.2     | YES     | YES       | no  | Full     |
| 24 | chr9:15,412,806-15,418,477            | BTA9_15.4     | YES     | no        | no  | Partial  |
| 25 | chr9:83,082,008-83,092,749            | BTA9_83.0     | YES     | no        | no  | Full     |
| 26 | chr9:84,257,434-84,262,548            | BTA9_84.2     | YES     | no        | no  | Full     |
| 27 | chr9:101,949,614-101,957,434          | BTA9_101.9    | YES     | YES       | no  | Full     |
| 28 | chr10:71,920,524-71,928,975           | BTA10_71.9    | YES     | no        | no  | Full     |
| 29 | chr10:87,425,735-87,443,841           | BTA10_87.4    | YES     | YES       | YES | Partial  |
| 30 | chr11:50,592,847-50,606,524           | BTA11_50.5    | YES     | no        | YES | Full     |
| 31 | chr11:61,788,705-61,792,024           | BTA11_61.7    | no      | YES       | no  | Full     |
| 32 | chr11:77,955,413-77,963,724           | BTA11_77.9    | YES     | no        | no  | Full#    |
| 33 | chr12:72,978,039-72,985,406           | BTA12_72.9    | YES     | YES       | no  | Full     |
| 34 | chr12:74,723,248-74,731,915           | BTA12_74.7    | YES     | YES       | no  | Partial  |
| 35 | chr15:9,435,764-9,439,369             | BTA15_9.4     | YES     | YES       | YES | Full     |
| 36 | chr16:10,720,162-10,727,571           | BTA16_10.7    | YES     | no        | no  | Full     |
| 37 | chr16:13,308,596-13,315,659           | BTA16_13.3    | YES     | no        | no  | Partial  |
| 38 | chr16:28,504,653-28,536,456           | BTA16_28.5    | YES     | no        | YES | Full     |
| 39 | chr18:27,619,893-27,626,348           | BTA18_27.6    | YES     | no        | YES | Partial  |
| 40 | chr18:27,715,161-27,722,285           | BTA18_27.7    | no      | no        | YES | Full     |
| 41 | chr18:50,368,602-50,378,304           | BTA18_50.3    | YES     | YES       | YES | Full     |
| 42 | chr18:60,211,168-60,220,590           | BTA18_60.2    | YES     | YES       | YES | Partial  |
| 43 | chr18:61,691,367-61,697,347           | BTA18_61.6    | YES     | no        | YES | Full     |
| 44 | chr19:5,180,841-5,189,334             | BTA19_5.1     | YES     | no        | no  | Partial  |
| 45 | chr19:22,014,748-22,025,138           | BTA19_22.0    | YES     | no        | no  | Full     |
| 46 | chr19:51,039,969-51,101,363           | BTA19_51.0    | no      | YES       | YES | Partial  |
| 47 | chr20:15,283,426-15,290,599           | BTA20_15.2    | YES     | no        | no  | Full     |
| 48 | chr20:55,126,259-55,134,120           | BTA20_55.1    | no      | YES       | no  | Full     |
| 49 | chr21:1,241,740-1,256,399             | BTA21_1.2     | YES     | YES       | YES | Partial  |
| 50 | chr21:2,303,211-2,307,834             | BTA21_2.3     | no      | YES       | no  | Full     |
| 51 | chr21:4,133,180-4,142,631             | BTA21_4.1     | no      | no        | no  | Full     |
| 52 | chr21:18,634,068-18,645,042           | BTA21_18.6    | no      | YES       | no  | Full     |
| 53 | chr22:160,456-166,792                 | BTA22_160.4   | no      | no        | YES | Full     |
| 54 | chr23:41,312,657-41,328,100           | BTA23_41.3    | YES     | no        | no  | Full     |
| 55 | chr23:52,329,640-52,337,577           | BTA23_52.3    | YES     | no        | no  | Full     |
| 56 | chr24:12,819,683-12,824,449           | BTA24_12.6    | YES     | YES       | no  | Partial  |
| 57 | chr24:53,067,680-53,078,844           | BTA24_53.0    | no      | no        | YES | Full     |
| 58 | chr25:20,428,960-20,444,963           | BTA25_20.4    | no      | no        | no  | Full     |
| 59 | chr26:50,606,858-50,616,960           | BTA26_50.6    | YES     | no        | no  | Full     |
| 60 | chr27:14,146,146-14,156,627           | BTA27_14.1    | no      | YES       | no  | Full     |
| 61 | chr28:17,575,320-17,582,731           | BTA28_17.5    | YES     | no        | no  | Full     |
| 62 | chr29:39,631,808-39,639,476           | BTA29_39.6    | YES     | no        | no  | Full     |
| 63 | chrX:27,723,875-27,732,458            | BTAX_27.7     | no      | YES       | no  | Full     |
| 64 | chrX:30,183,463-30,187,122            | BTAX_30.1     | YES     | no        | no  | Partial  |
| 65 | chrX:36,260,818-36,264,888            | BTAX_36.2     | YES     | no        | no  | Partial  |
| 66 | chrX:43,949,278-43,960,449            | BTAX_43.9     | no      | no        | YES | Full     |
| 67 | chrX:47,314,044-47,327,526            | BTAX_47.3     | no      | no        | YES | Full     |

Endogenous retroviruses (BERVK2) identified in cattle via PCIP-seq.

\*LTR matches APOB ERV (BTA11\_77.9)

#ERV inserted into APOB

Full = Full length ERV.

Partial = ERV with large deletion.

**Table S6**

|    | Approximate location in genome (OAR3) | ERV name   | 220 | 221 | provirus |
|----|---------------------------------------|------------|-----|-----|----------|
| 1  | chr1:57,132,178-57,139,903            | OAR1_57.13 | no  | YES | Full     |
| 2  | chr1:86,065,652-86,091,348            | OAR1_86.0  | YES | YES | Full     |
| 3  | chr1:129,489,883-129,502,056          | OAR1_129.4 | no  | YES | Full     |
| 4  | chr1:220,250,002-220,258,800          | OAR1_220.2 | YES | YES | Full     |
| 5  | chr1:240,077,458-240,092,905          | OAR1_240.0 | YES | YES | Partial  |
| 6  | chr1:253,739,233-253,756,582          | OAR1_253.7 | YES | YES | Partial  |
| 7  | chr2:196,585,537-196,593,010          | OAR2_196.5 | YES | no  | Full     |
| 8  | chr3:39,261,134-39,285,428            | OAR3_39.2  | YES | YES | Full     |
| 9  | chr3:39653898-39656987                | OAR3_39.6  | YES | YES | Partial  |
| 10 | chr3:151,767,643-151,783,037          | OAR3_151.7 | YES | YES | Partial  |
| 11 | chr3:182,538,937-182,555,692          | OAR3_182.5 | YES | no  | Full     |
| 12 | chr4:40,485,410-40,504,790            | OAR4_40.4  | YES | YES | Full     |
| 13 | chr4:77,416,611-77,428,510            | OAR4_77.4  | YES | YES | Partial  |
| 14 | chr5:7,744,521-7,756,178              | OAR5_7.74  | YES | YES | Partial  |
| 15 | chr5:64,916,815-64,926,920            | OAR5_64.9  | YES | no  | Partial  |
| 16 | chr5:73,009,027-73,018,771            | OAR5_73.0  | YES | no  | Full     |
| 17 | chr6:5,400,881-5,410,594              | OAR6_5.4   | no  | YES | Full     |
| 18 | chr6:6,789,991-6,858,767              | OAR6_6.7   | YES | YES | Partial  |
| 19 | chr6:26,968,086-26,977,558            | OAR6_26.9  | no  | YES | Full     |
| 20 | chr8:2,974,531-2,988,179              | OAR8_2.9   | YES | YES | Partial  |
| 21 | chr8:49,483,598-49,499,241            | OAR8_49.4  | YES | YES | Partial  |
| 22 | chr9:48,096,442-48,105,912            | OAR9_48.0  | no  | YES | Full     |
| 23 | chr9:89,743,769-89,752,495            | OAR9_89.7  | no  | YES | Partial  |
| 24 | chr10:70,892,072-70,919,960           | OAR10_70.8 | YES | no  | Partial  |
| 25 | chr11:32,085,050-32,095,786           | OAR11_32.0 | YES | YES | Full     |
| 26 | chr13:5,676,353-5,686,765             | OAR13_5.6  | no  | YES | Full     |
| 27 | chr13:16,714,529-16,726,069           | OAR13_16.7 | YES | YES | Full     |
| 28 | chr13:37,514,438-37,529,955           | OAR13_37.5 | YES | YES | Full     |
| 29 | chr13:66022872-66031772               | OAR13_66.0 | YES | no  | Full     |
| 30 | chr14:13,811,039-13,844,103           | OAR14_13.8 | YES | YES | Partial  |
| 31 | chr14:15,011,370-15,043,076           | OAR14_15.0 | YES | YES | Partial  |
| 32 | chr14:56,232,971-56,236,157           | OAR14_56.2 | YES | YES | Full     |
| 33 | chr14:57,491,683-57,503,056           | OAR14_57.4 | no  | YES | Partial  |
| 34 | chr14:57,605,121-57,623,737           | OAR14_57.6 | YES | YES | Partial  |
| 35 | chr15:10,864,017-10,870,430           | OAR15_10.8 | no  | YES | Full     |
| 36 | chr17:48,876,178-48,887,208           | OAR17_48.8 | no  | YES | Full     |
| 37 | chr18:1,738,143-1,751,356             | OAR18_1.7  | no  | YES | Partial  |
| 38 | chr18:67,778,281-67,799,930           | OAR18_67.7 | YES | YES | Full     |
| 39 | chr19:52,665,989-52,689,785           | OAR19_52.6 | YES | YES | Partial  |
| 40 | chr20:433,819-443,901                 | OAR20_0.4  | YES | no  | Full     |
| 41 | chr20:1,237,366-1,250,699             | OAR20_1.2  | no  | YES | Partial  |
| 42 | chr20:27,598,593-27,615,677           | OAR20_27.5 | no  | YES | Full     |
| 43 | chr21:6,694,384-6,709,701             | OAR21_6.6  | YES | no  | Partial  |
| 44 | chr22:46,781,990-46,790,196           | OAR22_46.7 | no  | YES | Full     |
| 45 | chr26:8,253,764-8,265,010             | OAR26_8.2  | no  | YES | Full     |
| 46 | chrX:3,690,949-3,701,009              | OARX_3.6   | YES | no  | Full     |
| 47 | chrX:62,939,566-62,949,333            | OARX_62.9  | YES | YES | Partial  |
| 48 | chrX:78,127,416-78,132,398            | OARX_78.1  | YES | no  | Partial  |

Endogenous retroviruses (enJSRV) identified in sheep via PCIP-seq.

Full = Full length ERV.

Partial = ERV with large deletion.

**Table S7**

| Patient  | ID                        | Estimated read count | Overlapping Gene | geneID          | Notes                     |
|----------|---------------------------|----------------------|------------------|-----------------|---------------------------|
| HPV18_PX | chr1:201993711-201993711  | 1                    | RNPEP            | ENSG00000176393 |                           |
| HPV18_PX | chr1:54070808-54070808    | 1                    | TCEANC2          | ENSG00000116205 |                           |
| HPV18_PX | chr1:74339164-74339164    | 2                    | FPGT-TNNI3K      | ENSG00000259030 |                           |
| HPV18_PX | chr11:72988358-72988358   | 6                    | FCHSD2           | ENSG00000137478 |                           |
| HPV18_PX | chr12:124528897-124528897 | 5                    | NCOR2            | ENSG00000196498 |                           |
| HPV18_PX | chr12:62430096-62430096   | 3                    | NA               | NA              |                           |
| HPV18_PX | chr12:88750111-88750111   | 2                    | NA               | NA              |                           |
| HPV18_PX | chr13:32401471-32401471   | 1                    | N4BP2L1          | ENSG00000139597 |                           |
| HPV18_PX | chr13:59883976-59883976   | 1                    | DIAPH3           | ENSG00000139734 |                           |
| HPV18_PX | chr13:70017637-70017637   | 1                    | KLHL1            | ENSG00000150361 |                           |
| HPV18_PX | chr13:96145444-96145444   | 1                    | HS6ST3           | ENSG00000185352 |                           |
| HPV18_PX | chr16:35696743-35696743   | 4                    | NA               | NA              |                           |
| HPV18_PX | chr16:46391666-46391666   | 15                   | NA               | NA              |                           |
| HPV18_PX | chr16:60839237-60839237   | 3                    | NA               | NA              |                           |
| HPV18_PX | chr17:50736162-50736162   | 1                    | LUC7L3           | ENSG00000108848 |                           |
| HPV18_PX | chr17:71945217-71945217   | 1                    | NA               | NA              |                           |
| HPV18_PX | chr18:33256597-33256597   | 2                    | CCDC178          | ENSG00000166960 |                           |
| HPV18_PX | chr2:175176252-175176252  | 1                    | NA               | NA              |                           |
| HPV18_PX | chr2:184979785-184979785  | 1                    | NA               | NA              |                           |
| HPV18_PX | chr2:222973976-222973976  | 1                    | NA               | NA              |                           |
| HPV18_PX | chr20:26724089-27697774   | 1                    | NA               | NA              | Virus in satellite repeat |
| HPV18_PX | chr20:59882951-59882951   | 4                    | SYCP2            | ENSG00000196074 |                           |
| HPV18_PX | chr21:31443081-31443081   | 5                    | TIAM1            | ENSG00000156299 |                           |
| HPV18_PX | chr21:8210410-8210516     | 6                    | FP671120.3       | ENSG00000280800 |                           |
| HPV18_PX | chr21:8225927-8228889     | 9                    | FP671120.1       | ENSG00000278996 |                           |
| HPV18_PX | chr21:8393406-8393551     | 9                    | FP236383.2       | ENSG00000280614 |                           |
| HPV18_PX | chr21:8437761-8437761     | 9                    | FP236383.3       | ENSG00000281181 |                           |
| HPV18_PX | chr21:8453856-8454775     | 19                   | NA               | NA              |                           |
| HPV18_PX | chr3:141177260-141177260  | 1                    | NA               | NA              |                           |
| HPV18_PX | chr3:183646815-183646815  | 5                    | KLHL24           | ENSG00000114796 |                           |
| HPV18_PX | chr3:52477576-52477615    | 67                   | NISCH            | ENSG0000010322  |                           |
| HPV18_PX | chr3:52491989-52492028    | 67                   | NISCH            | ENSG0000010322  |                           |
| HPV18_PX | chr3:52564151-52564190    | 75                   | SMIM4            | ENSG00000168273 |                           |
| HPV18_PX | chr4:113196089-113196089  | 3                    | ANK2             | ENSG00000145362 |                           |
| HPV18_PX | chr4:118149173-118149173  | 2                    | NDST3            | ENSG00000164100 |                           |
| HPV18_PX | chr4:125160196-125160196  | 2                    | NA               | NA              |                           |
| HPV18_PX | chr4:8361851-8361851      | 1                    | NA               | NA              |                           |
| HPV18_PX | chr5:85159333-85159333    | 2                    | NA               | NA              |                           |
| HPV18_PX | chr6:12217019-12217019    | 1                    | NA               | NA              |                           |
| HPV18_PX | chr6:58604926-59721758    | 1                    | NA               | NA              | Virus in satellite repeat |
| HPV18_PX | chr6:60995120-60995120    | 4                    | NA               | NA              |                           |

|          |                          |    |            |                 |  |
|----------|--------------------------|----|------------|-----------------|--|
| HPV18_PX | chr6:72218404-72218404   | 3  | RIMS1      | ENSG00000079841 |  |
| HPV18_PX | chr6:7655460-7655460     | 6  | NA         | NA              |  |
| HPV18_PX | chr7:55353950-55353950   | 10 | NA         | NA              |  |
| HPV18_PX | chr7:63798384-63798384   | 3  | NA         | NA              |  |
| HPV18_PX | chr7:7812181-7812181     | 4  | AC007161.3 | ENSG00000283549 |  |
| HPV18_PX | chr7:98111088-98111088   | 1  | LMTK2      | ENSG00000164715 |  |
| HPV18_PX | chr8:119801685-119801685 | 13 | TAF2       | ENSG00000064313 |  |
| HPV18_PX | chr8:2564068-2564068     | 1  | NA         | NA              |  |
| HPV18_PX | chr8:93515097-93515097   | 1  | LINC00535  | ENSG00000246662 |  |
| HPV18_PX | chr8:9886409-9886409     | 2  | NA         | NA              |  |
| HPV18_PX | chr9:12503146-12503146   | 1  | NA         | NA              |  |
| HPV18_PX | chr9:128458663-128458663 | 1  | ODF2       | ENSG00000136811 |  |
| HPV18_PX | chrX:19414286-19414286   | 1  | MAP3K15    | ENSG00000180815 |  |
| HPV18_PX | chrX:41675298-41675299   | 1  | CASK       | ENSG00000147044 |  |

|          |                          |   |            |                 |  |
|----------|--------------------------|---|------------|-----------------|--|
| HPV18_PY | chr5:37774016-37774016   | 2 | NA         | NA              |  |
| HPV18_PY | chr7:64329003-64329003   | 2 | ZNF736     | ENSG00000234444 |  |
| HPV18_PY | chr4:184039889-184039889 | 2 | NA         | NA              |  |
| HPV18_PY | chr18:108534-108534      | 2 | NA         | NA              |  |
| HPV18_PY | chr3:59699600-59699600   | 1 | NA         | NA              |  |
| HPV18_PY | chr4:90546531-90546531   | 1 | CCSER1     | ENSG00000184305 |  |
| HPV18_PY | chr5:146985347-146985347 | 1 | PPP2R2B    | ENSG00000156475 |  |
| HPV18_PY | chr6:41200232-41200232   | 1 | TREML2     | ENSG00000112195 |  |
| HPV18_PY | chr6:113561576-113561576 | 1 | NA         | NA              |  |
| HPV18_PY | chr1:107169512-107169512 | 1 | NTNG1      | ENSG00000162631 |  |
| HPV18_PY | chr1:218361256-218361256 | 1 | TGFB2      | ENSG00000092969 |  |
| HPV18_PY | chr3:52563123-52563123   | 1 | SMIM4      | ENSG00000168273 |  |
| HPV18_PY | chr9:15686595-15686595   | 1 | CCDC171    | ENSG00000164989 |  |
| HPV18_PY | chr9:137787856-137787856 | 1 | AL590627.1 | ENSG00000255585 |  |
| HPV18_PY | chr10:6703026-6703026    | 1 | AL158210.2 | ENSG00000285743 |  |
| HPV18_PY | chr10:23788794-23788794  | 1 | KIAA1217   | ENSG00000120549 |  |
| HPV18_PY | chr10:91570894-91570894  | 1 | NA         | NA              |  |
| HPV18_PY | chr11:97096506-97096506  | 1 | NA         | NA              |  |
| HPV18_PY | chr19:35339090-35339090  | 1 | CD22       | ENSG0000012124  |  |

## HPV integration sites identified in patients HPV18\_PX and HPV18\_PY

Estimated read count refers to number of reads after PCR duplicates have been removed, see <https://github.com/GIGA-AnimalGenomics-BLV/PCIP/blob/master/README.md>

**Table S8**

**PCIP-seq efficiency estimation in BLV**

| Sample name  | Virus | Host | PVL   | Template µg | Estimated number proviruses | Raw reads | Chimeric reads (%) | Pure Host / Pure Viral reads | Insertion sites | Largest clone (%) | Efficiency based on unique integration sites* |
|--------------|-------|------|-------|-------------|-----------------------------|-----------|--------------------|------------------------------|-----------------|-------------------|-----------------------------------------------|
| 233          | BLV   | OAR  | 78.3  | 7           | 913500                      | 524698    | 53.4               | 0.04 / 46.53                 | 5311            | 5.22              | 0.6                                           |
| 221 (022016) | BLV   | OAR  | 63    | 4           | 420000                      | 180276    | 67.14              | 3.59 / 29.27                 | 8023            | 0.625             | 1.9                                           |
| 221 (032014) | BLV   | OAR  | 16    | 4           | 106667                      | 32266     | 68.69              | 0.11 / 31.20                 | 5374            | 0.279             | 5.0                                           |
| 220          | BLV   | OAR  | 3.8   | 2           | 12667                       | 44876     | 67.38              | 0 / 32.62                    | 1352            | 3.55              | 10.7                                          |
| 1439         | BLV   | BosT | 45    | 3           | 225000                      | 181055    | 70.52              | 0.19 / 29.29                 | 5773            | 1.17              | 2.6                                           |
| 560          | BLV   | BosT | 0.644 | 1           | 1073                        | 6802      | 69.83              | 1.12 / 29.06                 | 172             | 4.59              | 16.0                                          |
| 1053         | BLV   | BosT | 23.5  | 6           | 235000                      | 367454    | 72.13              | 0.04 / 27.83                 | 17903           | 0.353             | 7.6                                           |

**PCIP-seq efficiency estimation in HIV-1**

| Sample name | Virus | Host | PVL  | Templ ate µg | Estimated number proviruses | Raw reads | Chimeric reads (%) | Pure Host / Pure Viral reads | Inserti on sites | Largest clone (%) | Efficiency based on unique integration sites* | Efficiency based on unique shear sites* | Average coverage per integration site | Range of coverage at integration site | Base pairs of host DNA sequenced | Base pairs of provirus sequenced with coverage >20 |
|-------------|-------|------|------|--------------|-----------------------------|-----------|--------------------|------------------------------|------------------|-------------------|-----------------------------------------------|-----------------------------------------|---------------------------------------|---------------------------------------|----------------------------------|----------------------------------------------------|
| 02006       | HIV-1 | HSA  | 0.46 | 12           | 9200                        | 240641    | 51.63              | 1.10 / 47.27                 | 158              | 7.82              | 1.7                                           | 2.95                                    | 700                                   | 1-11114                               | 467929                           | 391036                                             |
| 06042       | HIV-1 | HSA  | 0.56 | 8            | 7467                        | 226685    | 21.18              | 0.41 / 78.41                 | 73               | 4.77              | 1.0                                           | 1.0                                     | 645                                   | 2-4449                                | 155945                           | 166914                                             |

These efficiency estimations are based on unique integration sites observed and do not account for clonal expansion. As PCIP-seq will frequently capture the same integration site from multiple copies of the same clone this will underestimate the efficiency of the method. In the case of HIV-1 a manual count of shear sites allowed us to more accurately estimate the efficiency observed in these samples.

Chimeric reads (%): percentage of PCIP-seq reads that contain both host and viral sequences. These reads cover the integration site.



## Supplementary Information Text

### Supplementary Note 1

#### Rationale behind the use of CRISPR-cas9 to cleave circular DNA

It is established practice to linearize plasmids (generally via cutting with a restriction enzyme) prior to their use as template in PCR. It is believed that this avoids supercoiling and thereby increases PCR efficiency<sup>1</sup>. Following the same logic, we speculated that linearizing our circularized DNA could also increase PCR efficiency.

As we wanted to cut specific sequences we used the CRISPR-cas9 system. In many cases CRISPR-cas9 cleavage is not 100% effective. As can be seen in the gel below, for G2 a fraction of the target DNA remains uncut. In order to increase efficiency of cutting while also including redundancy against any SNPs in the targeted regions we pooled ~3 guides that targeted a relatively small region (generally a few hundred bases). We found that by pooling guides all the target DNA was successfully cut.

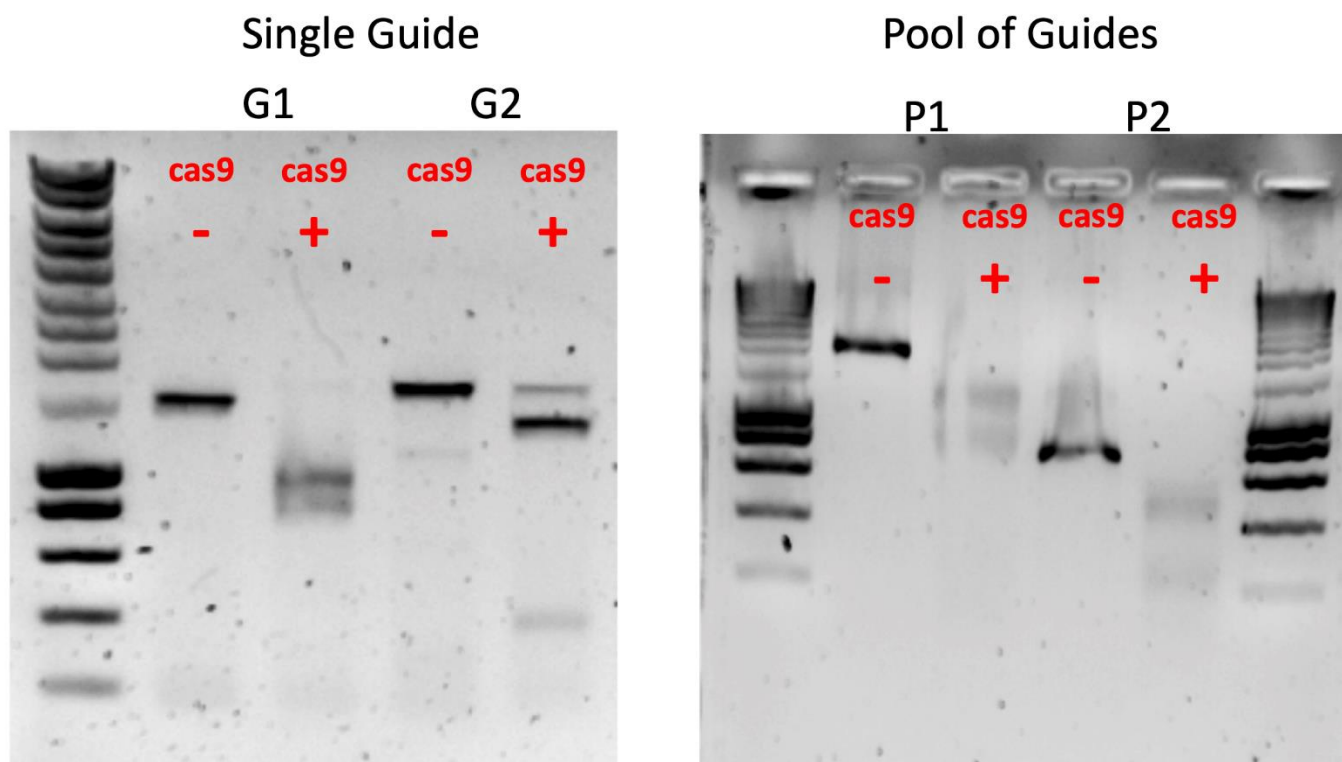

We next applied these pools to circular DNA. The gel below shows an experiment carried out using 8ug of DNA from a BLV infected sheep with a proviral load of 82.6%. The DNA was circularized and linear DNA was eliminated (to prevent PCR amplification/recombination involving the remaining linear fragments) using plasmid safe DNase (see methods for a complete description). One quarter of the resultant DNA was subject to CRISPR-cas9 cleavage using the Pool A guides, the second quarter was cleaved using the Pool B guides, the remaining half was kept aside. The linearized DNA was cleaned and used as template in 2x 50ul PCR reactions using the appropriate primer pairs for Pool A (PA) or Pool B (PB). For the uncut DNA half was used as template for 2x 50ul PCR reactions using the PA primers and the other half was used for 2x 50ul PCR reactions using the PB primers. Following 25 PCR cycles, 10ul of each reaction were loaded on a 1% agarose gel. As can be seen in the gel below, the band intensity for the CRISPR-cas9 cut samples is higher. It should be noted that in lane 3 the PCR smear is shifted down, we generally discard these types of products as the fraction of host-virus fragments is low. (A=unshared genomic DNA, B=genomic DNA sheared to 8kb)

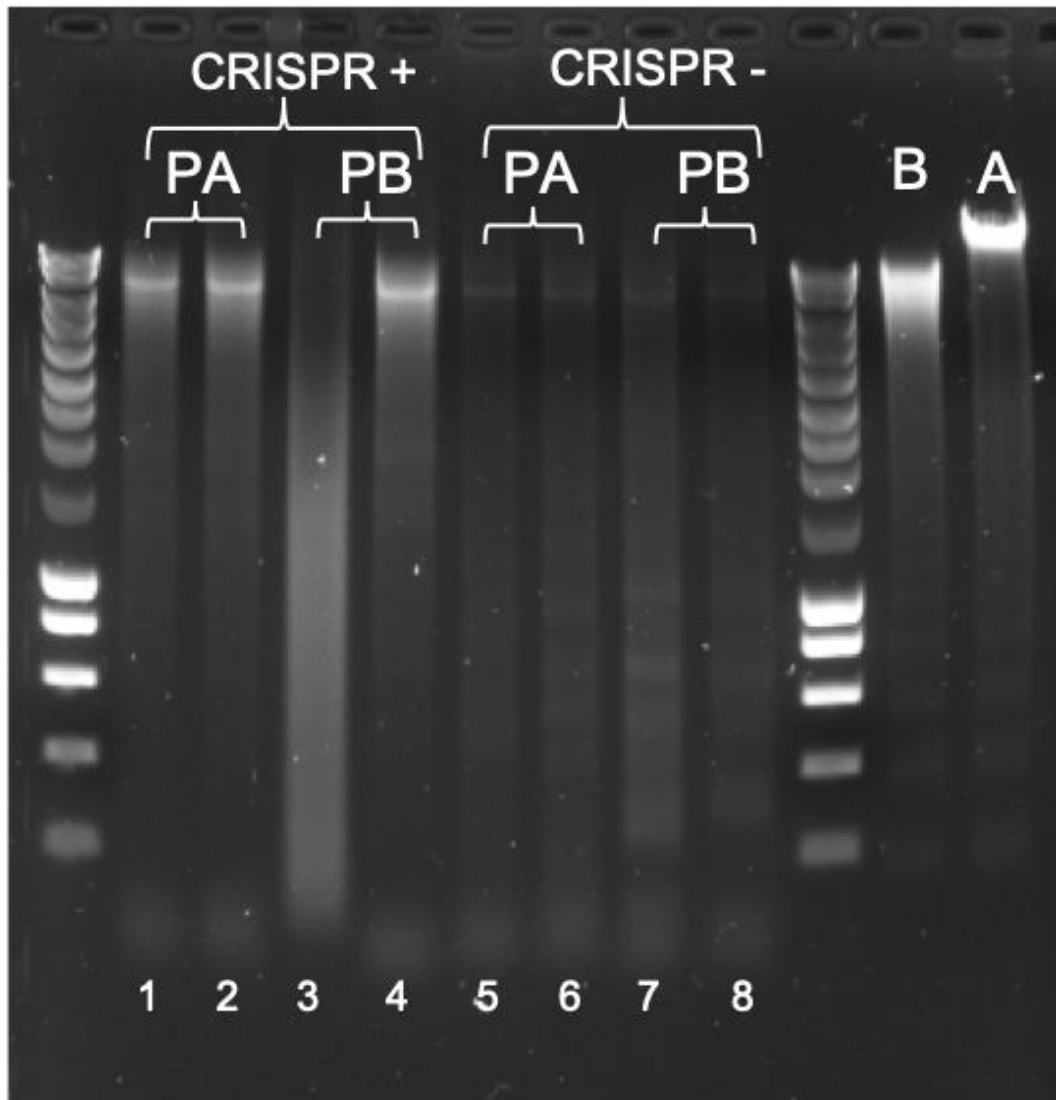

Following clean up and elution in ~40 ul of H<sub>2</sub>O we took an equal volume (3ul) of each library and indexed them via PCR, in a 50 ul reaction volume and using 8 cycles. Again, following clean up, an equal volume of library was pooled and a nanopore library (LSK-109) was prepared and sequenced on a r9.4 flow cell. Base calling and demultiplexing was carried out as described in the methods. The results are outlined in the table below. In addition the coverage of the resultant reads is shown.

| Lib | Treatment     | DNA concentration PCR 1 (ng/ul) | DNA concentration PCR 2 (ng/ul) | Raw reads | Chimeric reads % | Pure Host / Pure Viral reads (%) | Mean Length | N50    | Median Length | Insertion sites PCIP | Largest clone PCIP (%) | Insertion sites Illumina | Largest clone Illumina (%) |
|-----|---------------|---------------------------------|---------------------------------|-----------|------------------|----------------------------------|-------------|--------|---------------|----------------------|------------------------|--------------------------|----------------------------|
| 1   | PA-Cut BC31   | 22.52                           | 69.48                           | 113,485   | 55.6             | 0.25 / 44.2                      | 2880.6      | 3855.0 | 2217.0        | 2122                 | 25.8                   | 1700                     | 30.849                     |
| 2   | PA-Cut BC32   | 26.18                           | 72.06                           | 137,109   | 54.1             | 0.47 / 45.4                      | 2770.6      | 3710.0 | 2141.0        | 2216                 | 24.7                   | "                        | "                          |
| 3   | PB-Cut BC33   | 71.85                           | 63.7                            | 6,844     | 1.01             | 98.5 / 0.51                      | 263.8       | 277.0  | 195.5         | 2                    | 50                     | "                        | "                          |
| 4   | PB-Cut BC34   | 34.17                           | 86.65                           | 126,655   | 49.4             | 0.19 / 50.4                      | 2616.2      | 3395.0 | 2010.0        | 2281                 | 24.5                   | "                        | "                          |
| 5   | PA-UnCut BC35 | 13.4                            | 33.32                           | 42,795    | 22.5             | 0.19 / 77.3                      | 1759.8      | 2670.0 | 1227.0        | 660                  | 30.9                   | "                        | "                          |
| 6   | PA-UnCut BC36 | 17.26                           | 42.53                           | 66,602    | 19.7             | 0.19 / 80.2                      | 1549.1      | 2381.0 | 1056.0        | 713                  | 30.4                   | "                        | "                          |
| 7   | PB-UnCut BC37 | 22.27                           | 48.24                           | 114,967   | 10.4             | 0.16 / 89.4                      | 917.9       | 1579.0 | 497.0         | 690                  | 29.5                   | "                        | "                          |
| 8   | PB-UnCut BC38 | 14.71                           | 35.92                           | 64,789    | 18.1             | 0.19 / 81.7                      | 1461.4      | 2111.0 | 992.0         | 736                  | 30.4                   | "                        | "                          |

The table shows that libraries prepared with the CRISPR cut generally produced more raw reads and a much larger fraction of them is composed of the desired chimeric reads containing proviral and host DNA. The CRISPR cut libraries also identified a large number of integration sites. The comparison with an Illumina based library prepared from the same timepoint, using ~4ug of template, shows that PCIP can identify more integration sites. This experiment also shows that only libraries with a size distribution that mirrors that observed in the sheared DNA should be sequenced. Libraries with a preponderance of shorter fragments mainly represent nonspecific amplification.

Coverage of the pure viral reads as well as the chimeric reads on the BLV proviral genome (BC refers to the barcode used for each library)

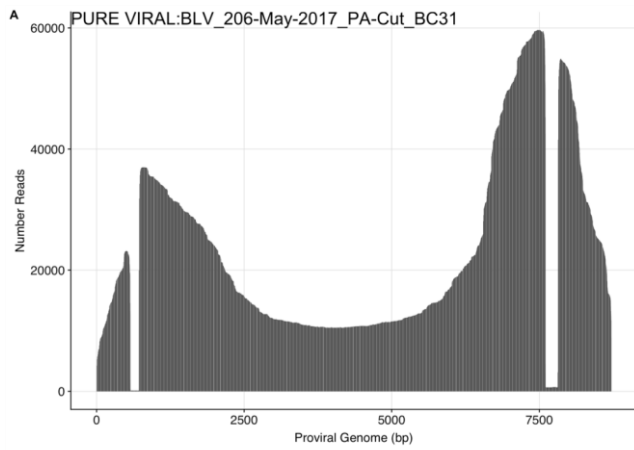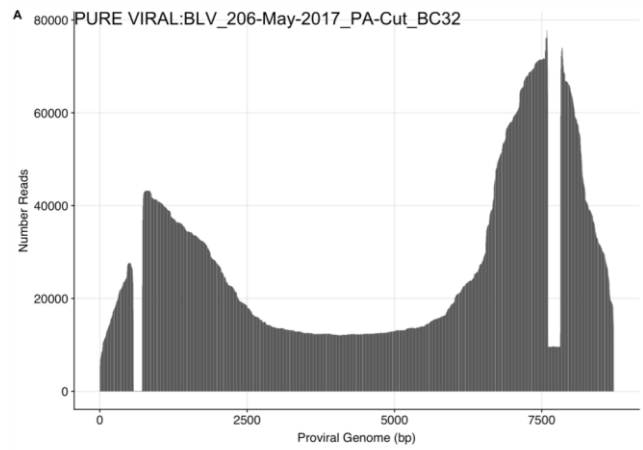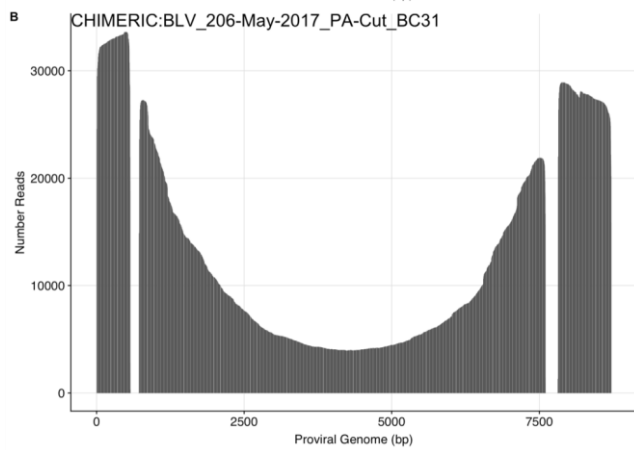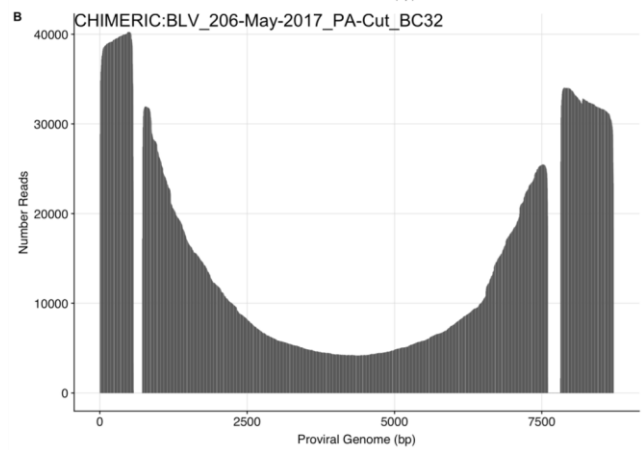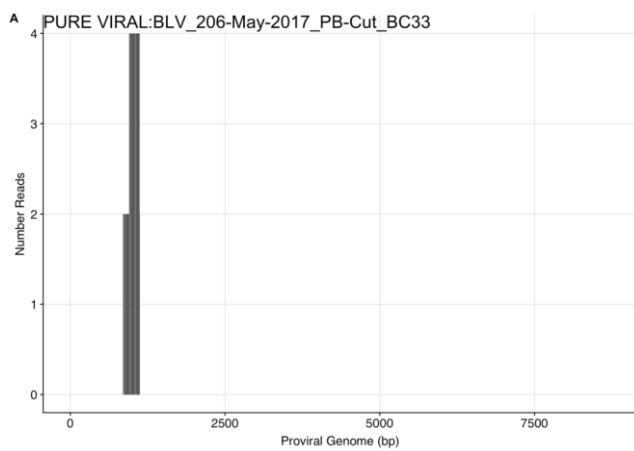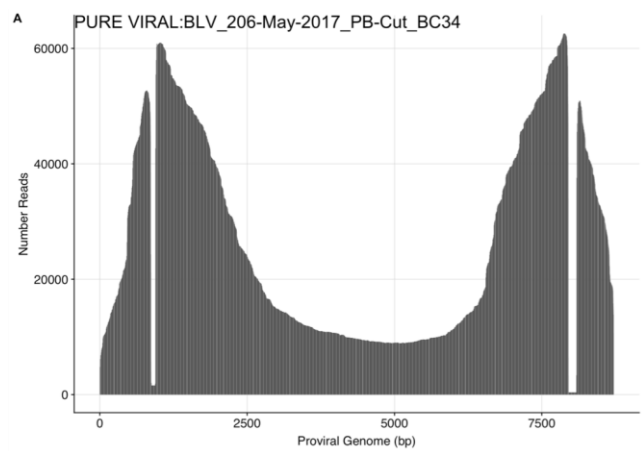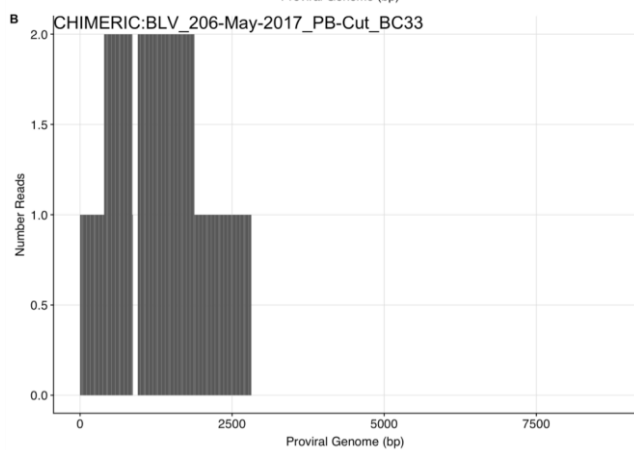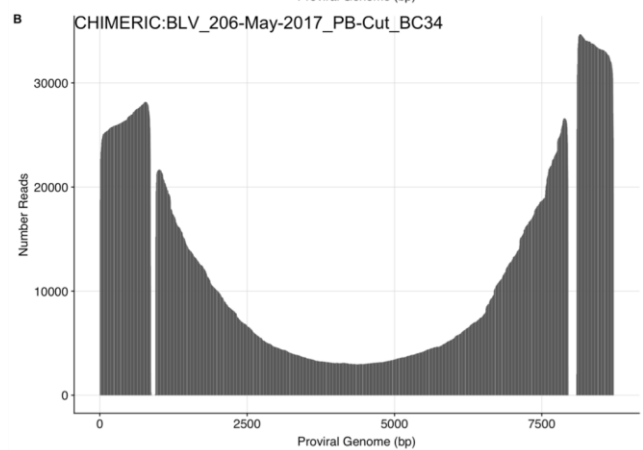

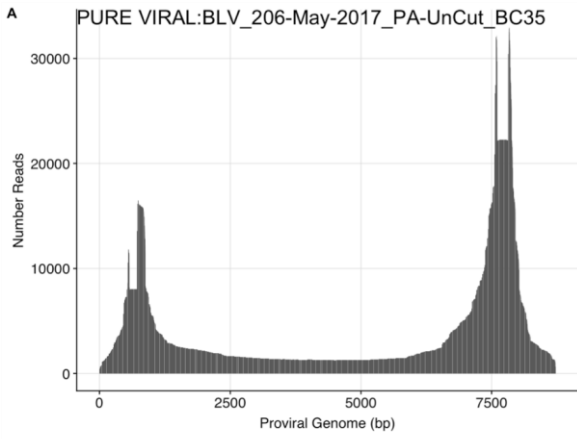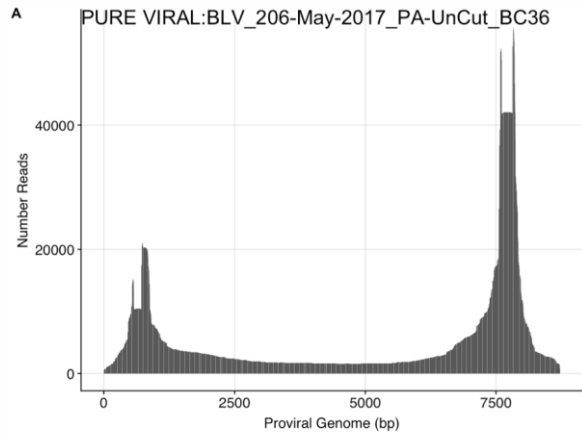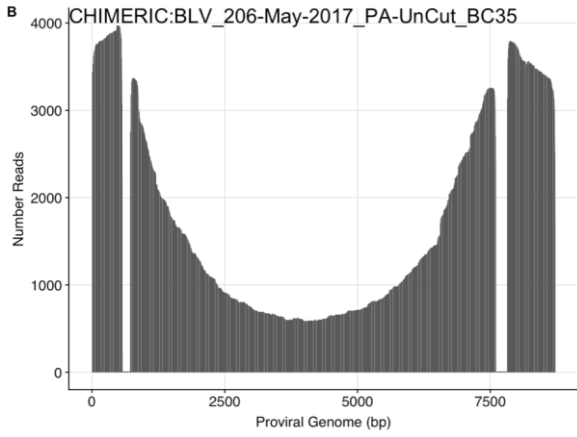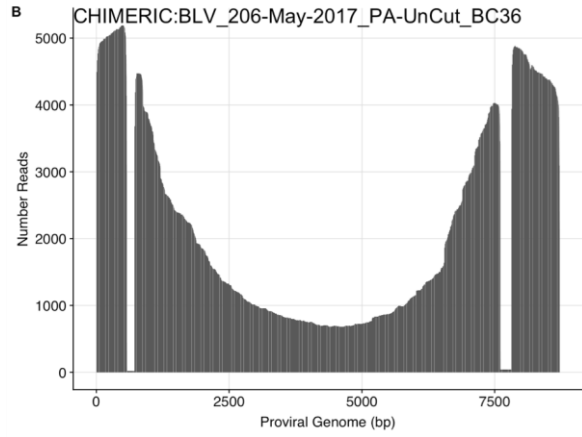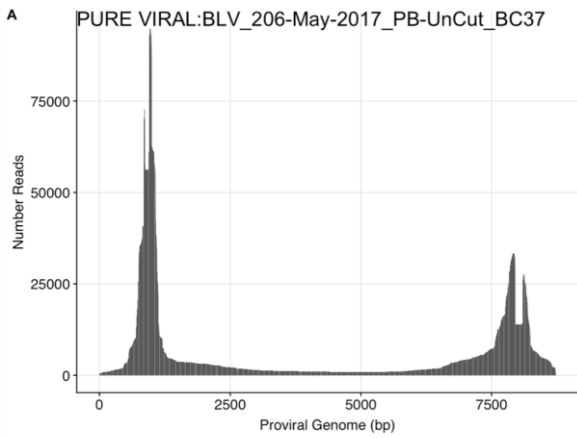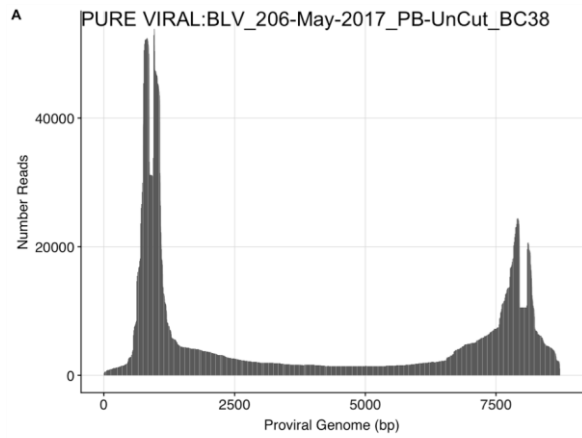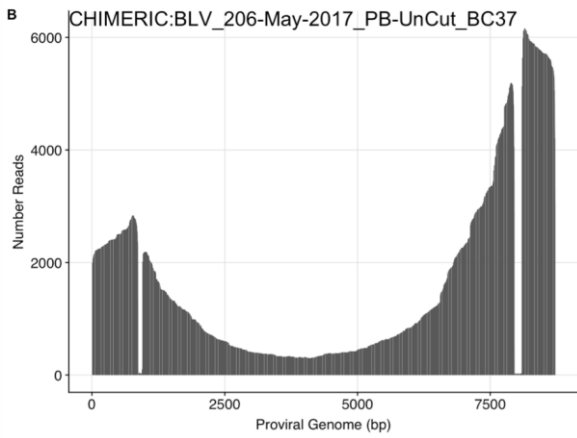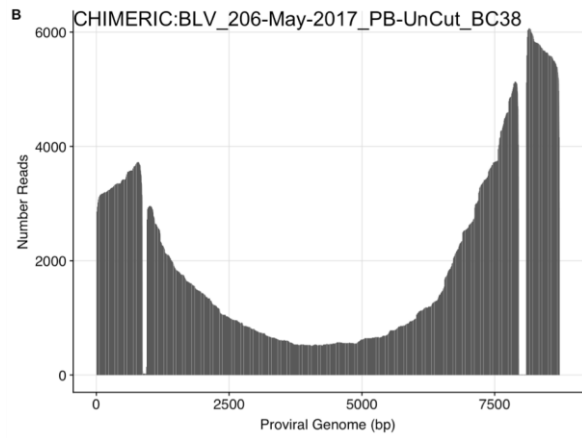

1.

## Supplementary Note 2

### Effect of coverage on SNP calling

One of the issues often raised regarding Nanopore sequencing is the error rate and the effect sequencing depth has on SNP calls. In this manuscript we have chosen to be quite conservative by only calling SNPs in proviruses with more than 10 reads after PCR duplicate removal. As base calling and variant calling algorithms continue to improve, such a cutoff is likely to be overly conservative. Without carrying out excessive and expensive validation via clone specific PCR it is difficult to decide on an optimal coverage cutoff for calling SNPs in a provirus due to the difficulty of distinguishing between false positives/negatives in the provirus as one adjust thresholds.

In order to get an estimation of the effect coverage has on variant calling we instead decided to look at the part of the host genome captured by PCIP-seq. We sequenced the two HIV-1 patient PCIP-seq libraries used to generate the Nanopore data with Illumina short reads on a MiSeq instrument. This produced ~2.3 million paired-end reads for each library. The shearing necessary to generate the Illumina library prevents us linking viral reads to a specific provirus/integration site, precluding a comparison of variants within the provirus using the two technologies and at different depths. Instead we compared variants found in the DNA flanking the integration sites sequenced by both technologies.

We concentrated on proviruses that were not clonally expanded. We did this for two reasons. Firstly, in the two HIV-1 samples used in this study the majority of proviruses fall into this category. Second, in such cases all the reads are PCR duplicates and cover the same part of the host genomes, at an even coverage, making the downsampling more consistent. We selected proviruses/integrations where the Illumina coverage was on average greater to or equal to ~50X to insure accurate variant calling. This left us with 118 sites in total, 77 sites for patient 02006 and 41 for patient 06042 (both represent 59% of the non-clonally expanded sites in the patients). The flanking host DNA associated with these proviruses covers ~202kb, while the median coverage from the Illumina sequencing was 274X.

We first called SNPs in the Illumina data using lowfreq. The resultant VCF was filtered with SnpSift to retain SNPs with an allele frequency in the reads of >0.6, leaving 157 SNPs. We compared these SNPs to a set of common human variants ([ftp://ftp.ncbi.nih.gov/snp/organisms/human\\_9606/VCF/](ftp://ftp.ncbi.nih.gov/snp/organisms/human_9606/VCF/)) and found that 141 (90%) represent common SNPs segregating in the human population. Of the remaining 10% (16 SNPs), 13 had a high allele frequency in the reads (average AF= 0.98), suggesting that these are true SNPs at a low frequency in the population. (This assumes that the original Watson and Crick strands both generally contribute to the amplified pool of products and having the same base substitution on both strands in the very early rounds of amplification is rare). For the remaining 3 SNPs, the allele frequency average was ~0.65, suggesting PCR errors that had occurred in the first round of amplification on either the Watson and Crick strand, that had come to dominate the pool of products, lifting it over our 0.6 cutoff.

We next called SNPs in the Nanopore data from the same 118 regions (median coverage 547X). After filtering for an allele frequency in the reads of >0.6 we called 142 SNPs. All overlapped with the SNPs called in the Illumina data. This left 15 SNPs called in the Illumina data but absent from the Nanopore calls (9.6% false negatives). Of these, 10 had been called as SNPs by lowfreq in the Nanopore data but the allele frequency (average AF= 0.49) did not exceed the 0.6 cutoff. (Two of the potential false positives SNPs called in the Illumina data, with AF~0.65, were not called as SNPs in the Nanopore data, the third false positive was also called in the Nanopore data.) For the remaining 5 SNPs, where lowfreq did not produce calls, examination of the reads in IGV showed them to be imbedded within a homopolymer (a known weakness of the R9.4 Nanopore data), although their presence could be deduced by examining the raw reads in IGV. Rebase calling the data with the latest high accuracy Nanopore base callers or using the R10.3 flow cell would help with these homopolymer regions. Alternative technologies like Pacbio Hi-Fi reads could also be employed if high single molecule accuracy is desired.

To address the effect of coverage on variant calling we then downsampled every region to an average coverage of ~100X, ~50X and ~20X and again called SNPs from the remaining Nanopore reads. Downsampling did not result in any false positives. Instead, reducing read number had the effect of increasing false negatives, with false negative rates of 13.4%, 15.3% and 19.1% observed in the ~100X, ~50X and ~20X downsampled reads respectively. These numbers are summarized in the table below.

|                                                   | Illumina | Nanopore | Nanopore 100X | Nanopore 50X | Nanopore 20X |
|---------------------------------------------------|----------|----------|---------------|--------------|--------------|
| Sample 02006                                      | 119      | 107      | 103           | 101          | 98           |
| Sample 06042                                      | 38       | 35       | 33            | 32           | 29           |
| Total                                             | 157      | 142      | 136           | 133          | 127          |
| % SNPs called in Nanopore also called in Illumina |          | 90.4     | 86.6          | 84.7         | 80.9         |

Calling SNPs in the host DNA flanking HIV-1 proviruses with both Nanopore and Illumina technologies and examining the effect of coverage on number of SNPs called.

As a consequence, we can conclude that higher coverage helps reduce false negatives, but even with relatively modest coverage false positives are not a major issue, instead we are more likely to get false negatives as the coverage goes down.

## Supplementary Methods

### PCR validation and Illumina sequencing

Clone specific PCR products as well as the PCIP-seq libraries generated from the HIV-1 patients were sheared to ~400bp using the Bioruptor Pico (Diagenode) and Nextera XT indexes added as previously described<sup>2</sup>. Illumina PCIP-seq libraries were generated in the same manner. Sequencing was carried out on either an Illumina MiSeq or NextSeq 500. Clone specific PCR products sequenced on Nanopore were indexed by PCR, multiplexed and libraries prepared using the Ligation Sequencing Kit 1D (SQK-LSK108) and sequenced on a MinION R9.4 flow cell. Oligos used can be found in Supplementary Dataset 3.

### Measure of HIV-1 DNA content in CD4 T-cell DNA isolates by digital droplet PCR (ddPCR)

The DNA was subjected to a restriction digest with EcoRI (Promega, Leiden, The Netherlands) for one hour, and diluted 1:2 in nuclease free water. HIV-1 DNA was measured in triplicate using 4 µL of the diluted DNA as input into a 20µL reaction, while the RPP30 reference gene was measured in duplicate using 1 µL as input. Primers and probes are summarized in Supplementary Dataset 3. Thermocycling conditions were as follows: 95°C for 10 min, followed by 40 cycles of 95°C for 30 s and 56°C for 60 s, followed by 98°C for 10 min.

### Detailed PCIP-seq protocol

#### Before starting library preparation

gRNA designed with CHOP CHOP (<https://chopchop.cbu.uib.no/>)

Oligo sequences generated via (<http://nebiocalculator.neb.com/#!/sgrna>)

Oligos ordered from IDT ([www.idtdna.com](http://www.idtdna.com))

In the case of HIV-1 due to the large amount of variation generally seen within proviruses we found it necessary to generate guides and primers tailored to the patient. We first carried out nested PCR using 250 ng of template DNA to amplify the regions upstream and downstream of the 5' and 3' LTR. The resultant PCR products were then sequenced via Nanopore (Illumina could equally be used). A consensus of the resultant reads was then used to select amongst the existing HIV-1 guides and primers we had already generated or when necessary to design new ones using CHOP CHOP and Primer 3.

#### Primers used in HIV-1

|        |     |                  |                                                                   |
|--------|-----|------------------|-------------------------------------------------------------------|
| A1mod2 | 1st | U5-623F<br>NE1   | AAATCTCTAGCAGTGGCGCCCGAACAG<br>CCACTAACTTCTGTATGTCATTGACAGTCCAGCT |
|        | 2nd | U5-638F<br>ProC- | GCGCCCGAACAGGGACYTGAAARCGAAAG<br>GAGTATTGTATGGATTTTCAGGCCCAAT     |
| B2     | 1st | GP41Fo<br>3LTRi  | TTCAGACCTGGAGGAGGAGATAT<br>TCAAGGCAAGCTTTATTGAGGCTTAA             |
|        | 2nd | GP41Fi<br>3UTRi  | GGACAATTGGAGAAGTGAATTAT<br>AGGCTTAAGCAGTGGGTTCCCTAG               |

### gRNAs generated using EnGen sgRNA Synthesis kit, *S. pyogenes*, New England Biolabs #E3322S

Following the manufacturer's recommendations assemble reaction at RT, in the order listed. For preparation of a pool of guide RNAs, take 5 µL of each guide oligo and pool. Then dilute 5 µL of the pool in 495 µL of H<sub>2</sub>O to make a 1 µM solution. Use this for the following steps.

|                        |       |
|------------------------|-------|
| H <sub>2</sub> O       | 2 µL  |
| Engen 2X reaction mix  | 10 µL |
| Guide Oligo (1 µM)     | 5 µL  |
| DTT (0.1M)             | 1 µL  |
| Engen sgRNA enzyme mix | 2 µL  |

Total volume 20  $\mu$ L

Mix thoroughly - Spin down – incubate at 37°C for 30 minutes

Transfer on ice

Add 30  $\mu$ L of H<sub>2</sub>O (volume up to 50)

Add 2  $\mu$ L of DNase I (RNase free, provided)

Mix – incubate at 37°C for 15 minutes

Purify with 2X RNAClean XP kit, Beckman Coulter, #A63987

Quantify the purified guide RNAs on a nanodrop spectrophotometer and keep them on ice

## Library preparation Day 1

### 1) Shear DNA in 8KB fragments using covaris g-tubes

Ref - <http://covaris.com/products/g-tube/#tab-id-1>

**Optional.** Remove small DNA fragments using 0.8X AMPure XP beads, Beckman Coulter, #A63881.

Dilute DNA in 75  $\mu$ L (typically 5  $\mu$ g but can be scaled up or down) and transfer in covaris tubes.

Centrifuge the covaris tube at 7200 RPM for 1 min placing the tube straight and another minute placing it upside down in the centrifuge. Sheared material will be collected in the covaris tube cap.

*Note: Check quality and size of the starting DNA and of the sheared DNA on a 1% agarose gel, loading an aliquot of sheared and unsheared DNA. Shown below in **A** is appropriate high molecular weight DNA to use as starting material, **B** the same DNA following shearing*

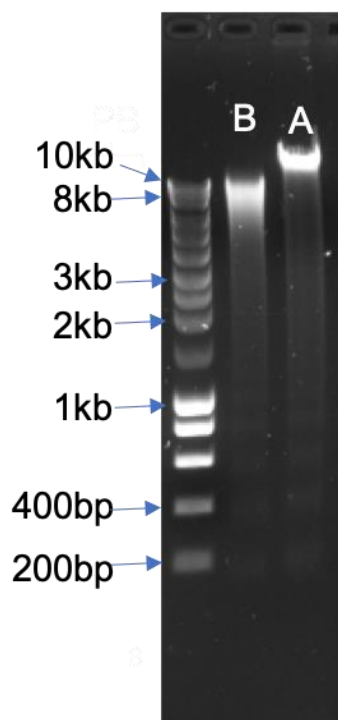

### 2) End Repair the DNA fragments NEBNext EndRepair Module, New England Biolabs, #E6050

*For end repair reactions of 75  $\mu$ L of DNA each, each reaction can include a maximum of 5  $\mu$ g of DNA. If more than 5  $\mu$ g of samples are being processed, volumes need to be scaled up.*

|        |              |
|--------|--------------|
| Buffer | 9.75 $\mu$ L |
| Enzyme | 4.5 $\mu$ L  |
| DNA    | 75 $\mu$ L   |

Incubate at 20°C for 30 minutes.

### 3) Purify DNA using AMPure XP beads 1X (90 $\mu$ L) and resuspend in 30 $\mu$ L of H<sub>2</sub>O.

### 4) Fragment circularization via Ligation reaction, T4 DNA Ligase (New England Biolabs).

*Example shows reaction volumes for intramolecular circularization of 2  $\mu$ g of DNA. If more input DNA is used, volumes need to be scaled up (can also be scaled down).*



|                           |                              |
|---------------------------|------------------------------|
| Blunt end repaired DNA    | 2 µg of DNA eluted in 260 µL |
| T4 Buffer                 | 30 µL                        |
| Ligase (400.000 units/ml) | 15 µL                        |

Mix gently and incubate at 16°C overnight.

## Library preparation Day 2

### 1) Linear DNA digestion using Plasmid-Safe-ATP-Dependent DNase (Epicentre, Madison WI)

Add the enzyme directly (1 µL for 2 µg of DNA, scale up or down accordingly).

*Note: the buffer of the plasmid-safe-ATP-dependent- DNase is compatible with the T4 Ligase buffer.*

Incubate at 37°C for 1 hour, then at 70°C for 30 min (heat inactivation step). Let the DNA cool down at room temperature.

### 2) Purify DNA using AMPure beads 1X and resuspend in 26 µL H2O.

**NOTE:** nanodrop spectrophotometer does not give accurate quantification of the DNA at this point.

### 3) Crispr-Cas9 Digestion of circularized DNA using NEB kit # M0386

Each sample will be split in two separate reactions of 1 µg each, to be digested with the appropriate pools of RNA guides (pool A and pool B) targeting different portions of the target virus.

*each sample split in two*

|                                                                         |               |               |
|-------------------------------------------------------------------------|---------------|---------------|
| H2O                                                                     | 9 µL          | 9 µL          |
| 10x Cas9 buffer                                                         | 3 µL          | 3 µL          |
| Guide RNA 300 nM<br>(10 ng/µL for our RNAs, these are about 100bp long) | 4.5 µL pool A | 4.5 µL pool B |
| 1uM of Cas9 Nuclease enzyme                                             | 1.5 µL        | 1.5 µL        |

Incubate at 25°C for 10 min

|                      |       |       |
|----------------------|-------|-------|
| Add circularized DNA | 12 µL | 12 µL |
|----------------------|-------|-------|

|              |       |       |
|--------------|-------|-------|
| Total volume | 30 µL | 30 µL |
|--------------|-------|-------|

Mix- Spin- incubate at 37°C for 1 hour

Add 1 µL of Proteinase K

Mix- Spin – incubate at room temperature for 10 min

### 4) Purify DNA using AMPure beads 1X (30 µL), resuspend in 26 µL of H2O each.

**Note:** avoid allowing beads to dry too much, this could shear long DNA fragments.

Aliquot 1.5 µL of sample and quantify via nanodrop spectrophotometer.

Typically ~10-15% of the starting material is recovered at this point.

*Note: For following PCR reactions, the appropriate primers that flank the sites of the Guide RNAs Pool should be used.*

### 5) Long range PCR1 overnight using primer pairs designed to flank the specific Crispr Cas9 digestion site. LongAmp® Hot Start Taq 2X Master Mix (New England Biolabs) # M0533

Primer working solution prepared by taking 2.5 ul of the 100 uM stock solution for each of the four primers in the pool and diluting in 190 µl H2O.

Take 25 µL of LongAmp Hot Start master mix + 2 µL of primer working solution + 23 µL of sample.  
(Final concentration for each primer 0.2 µM)

Program

95 °C - 00:30

95 °C – 00:30

62 °C – 00:30

65 °C – 10:00

} 30 cycles\*

65 °C – 06:00  
4 °C – pause

\*Number of cycles can be increased or decreased, for low proviral load samples such as HIV-1 35 cycles are often required. Samples with large numbers of copies of the target virus (eg ERVs) can reduce the number of cycles to 25.

### Library preparation Day 3

#### 1) Load 10 µL of Long range PCR1 products on a 1% agarose gel.

Shown below is the part of the gel from the Supplementary Note showing 10 ul of PCR1 loaded on a 1% agarose gel. Lanes 1,2 and 4 show PCRs that produced a high molecular weight band at about ~8 kb, when sequenced this will produce a good quality library. Lane 3 shows a PCR that has a preponderance of shorter fragments, sequencing of such PCR product is not advised as these molecules are mainly derived from the host and yield very few integration sites (see the Supplementary Note table). It should be noted that lanes 3 and 4 used identical input DNA and PCR mix, about ~10% of PCR reactions (in all viruses targeted) generate these patterns of short fragment stochastically, probably due to nonspecific amplification. PCRs that produce such a pattern should be repeated. The Supplementary Note details the DNA concentrations obtained for these libraries, the number of virus/host chimeric reads and number of integration sites captured. (The products of PCR2 when run on a 1% agarose gel should produce the same pattern.)

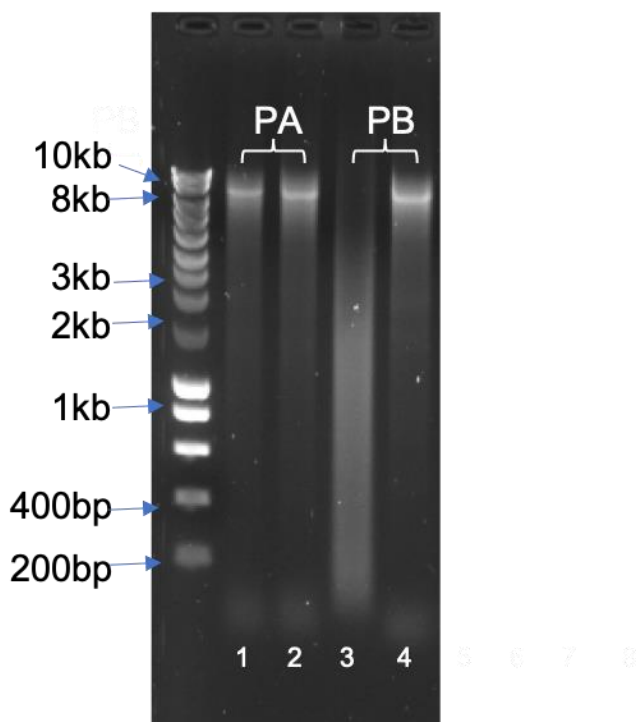

#### 2) Purify the remaining DNA using AMPure beads 1X, resuspend in 35 µL H2O.

Quantify via nanodrop spectrophotometer and calculate the volume required for 50 ng in 23 µL H2O  
Save PCR1 as a backup.

#### 3) Long range indexing by PCR, LongAmp Taq DNA Polymerase (New England Biolabs) # m0323

*Options: Indexing of the samples can be done via a second PCR using the PCR Barcoding Expansion KIT 1-96 (EXP-PBC096) from Oxford Nanopore or via ligation of barcodes using the Native Barcoding Expansion 1-12 (EXP-NBD104) Oxford Nanopore.*

Take 25 µL of LongAmp Hot Start master mix + 2 µL of Nanopore Barcode primers at 10 µM each + 23 µL of sample containing 50ng of PCR1 product.

Program

94 °C - 00:30

94 °C – 00:20

58 °C – 00:30

65 °C – 10:00

} 6 cycles

65 °C – 07:00

4 °C – pause

- 4) **Load 10 µL of Long range PCR1 products on a 1% agarose gel.**
- 5) **Purify the remaining DNA using Ampure beads 0.8X, resuspend in 35 µL H2O each.**  
Quantify via nanodrop spectrophotometer  
  
**Optional:** Pool equal amount of the libraries to be sequenced and clean with using 0.4X Ampure beads to remove small fragments, then proceed to library prep
- 6) **Oxford Nanopore library preparation using the Ligation sequencing KIT LSK109, according to the manufacturer's instructions**

#### **Supplementary References**

1. Chen, J., Kadlubar, F. F. & Chen, J. Z. DNA supercoiling suppresses real-time PCR: a new approach to the quantification of mitochondrial DNA damage and repair. *Nucleic Acids Res.* 2007; 35:1377–1388
2. Durkin K, Rosewick N, Artesi M, Hahaut V, Griebel P, Arsic N, Burny A, Georges M, Van den Broeke Anne. Characterization of novel Bovine Leukemia Virus (BLV) antisense transcripts by deep sequencing reveals constitutive expression in tumors and transcriptional interaction with viral microRNAs. *Retrovirology* 2016; 13:1–16.
