# Supplementary material for: PCIP-seq: simultaneous sequencing of integrated viral genomes and their insertion sites with long reads
Source: PubMed Central journal article supplement (PMC8025556; doi:10.1186/s13059-021-02307-0), 2021-04-06
Supplement: 13059_2021_2307_MOESM3_ESM.pdf [file 13059_2021_2307_MOESM3_ESM.pdf]

## Supplementary Dataset 2

Proviral sequences generated as part of the study using the `medaka_consensus` program (<https://nanoporetech.github.io/medaka/index.html>) with manual correction guided by mapping reads to consensus and inspection in IGV

pBLV344

Bos-1053\_BLV\_consensus

Bos-1439\_BLV\_consensus

HIV\_U1\_CHRX

HIV\_U1\_CHR2

02006\_consensus, consensus sequence of the proviruses from patient 02006

02006\_chr10\_sc, sequence of the provirus with ID chr10:41845251-42110306\*

02006\_cen, sequence of the provirus with ID chr13:16283554-17732159\*

BosT\_ERV\_chr11\_APOB

\*these two consensus sequences were generated using a limited number of Nanopore reads and as a consequence there is a higher chance that they may contain errors.

### >pBLV344 8721 bp

TGTATGAAAGATCATGCCGGCCTAGGCGCCGCCACCGCCCCGTAAACCAGACAGAGACGTCAGCT  
GCCAGAAAAGCTGGTGACGGCAGCT

GGTGGCTAGAATCCCCGTACCTCCCCAACTTCCCCTTTCCCGAAAAATCCACACCCCGAGCTGCTG  
ACCTCACCTGCTGATAAAACAATA

AAATGCCGGCCCTGTGAGTTAGCGGCACCAGAAGCGTTCTCCTCCTGAGACCCTCGTGCTCAGC  
TCTCGGTCCTGAGCTCTTTGCTCC

CGAGACCTTCTGGTCGGCTATCCGGCAGCGGTCAGGTAAGGCAAACCACGGTTTGGAGGGTGGTT  
CTCGGCTGAGACCACCGCGAGCTCT

ATCTCCGGTCTCTGACCGTCTCCACGTGGACTCTCTCTCTTGCCTCCTGACCCCGCGCTCCAAGG  
GCGTCTGGCTTGCACCCGCGCTTG

TTTCCTGTCTTACTTTCTGTTTCTCGCGGCCCGCGCTCTCTCCTTCGGCGCCCTCTAGCGGCCAGG  
AGAGACCGGCAAACAATTGGGGGC

TCGTCCGGGATTGATCACCCCGGAACCCTAACAATCCTCTGGACCCACCCCTCGGCGGCGTTTT  
GGTCTTTCTTTAAATTATATCAT

GGGAAATCCCCCTCCTATAACCCCGGCTGGTATCTCCCCTCAGACTGGCTCAACCTTTTGCA  
AAGCGCGCAAAGGCTCAATCCGCG

ACCCTCTCCTAGCGATTTTACCGATTTAAAAAATTACATCCATTGGTTTCATAAGACCCAGAAAAAAC  
CATGGACTTTCACTTCTGGTGG

CCCCGCCTCATGCCACCCGGGAAATTCGGCCGGGTTCCCCTTGTCTTGGCCACCCTAAACGAAG  
TGCTCTCAAACGATGAGGGCGCCCC

GGGTGCATCGGCCCCAGAAGAACAACCCCCCTTATGACCCCGCCGTTTTGCCAATCATAT  
CTGAAGGGAATCGCAACCGCCATCG

CGCTTGGGCACTCCGAGAATTACAAGATATTAAGAAAGAAATTGAAAATAAGGCACCGGTTTCGCA  
AGTATGGATACAAACTACGACT

TGCAATCTTGCAGGCCGACCCTACTCCTGCTGACCTAGAACAACCTTGGCAATATATTGCTTCCCCG  
GTCGATCAAACGGCCACATGAC

CAGCCTAACGGCAGCAATAGCAGCCGCTGAAGCGGCCAACACCCTTCAGGGTTTTAATCCCCAAA  
ACGGGACCCTGACCCAACAATCAGC

TCAGCCCAACGCCGGGATCTTAGAAGTCAATATCAAAACCTTTGGCTTCAGGCCTGGAAAAATCT  
CCCTACTCGTCCTTCAGTACAACC

CTGGTCCACCATCGTCCAAGGCCCGCCGAGAGCTATGTAGAGTTTGTCAACCGGTTACAAATTC  
ATTAGCTGACAACCTTCCCGACGG

AGTCCCTAAAGAACCATTATTGACTCCCTTAGCTATGCTAATGCTAACAAAGAATGCCAACAAATTT  
TGCAGGGGCGGGGCCTAGTGGC

CGCCCCGGTGGGACAAAACTGCAGGCTTGTGCACATTGGGCCCCCAAGATTAACAGCCTGCAA  
TCCTCGTCCACACCCAGGGCCCAA

GATGCCCGGGCCTCGGCAACCGGCCCCCAAAAGGCCCCCGGGACCATTGCTATCGATGCCTC  
AAAGAAGGCCATTGGGCCCGGGACTG

TCCCACCAAGACCACCGGCCCCCTCCGGGACCTTGCCCATATGCAAAGATCCTTCCATTGGAA  
ACGAGACTGTCCAACCCTCAAATC

AAAAACTAATAGAGGGGGGACTTAGCGCCCCCAAACCGTAACCCCTATAACAGATCCTCTTAGT  
GAGGCTGAATTGAATGCTTACTT

TCTATTCCTCTGGCTCGCAGCCGTCCCTCCGTGGCTGTATACCTGTCTGGCCCTGGCTGCAGCC  
CTCTCAGAATCAAGCCCTTATGCTC

GTGGACACCGGGGCTGAAAATACGGTCCTCCACAAAATTGGCTGGTTTCGAGATTACCCACGGAT  
CCCCGCCGAGTGCTCGGAGCGGGG

GGAGTCTCCCGGAACAGATACAATTGGCTACAAGGCCCTCTGACCCTGGCTCTAAAACCAGAGGG  
TCCCTTTATCACCATCCCAAAAATT

TTAGTTGACACTTTCGATAAATGGCAAATTTTAGGACGGGACGTCTCTCCCGCCTACAGGCCTCTA  
TCTCCATACCTGAGGAGGTACGC

CCCCCATGGTAGGCGTCTAGATGCCCCCGAGCCACATTGGATTAGAACATTTGCCCGCCCC  
ACCTGAGGTACCTCAATTCCCTTTA

AACTAGAACGCCTCCAGGCCCTTCAAGACCTGGTCCATCGCTCTCTGGAGGCAGGTTATATCTCCC  
CCTGGGACGGGCCAGGCAATAATC

CAGTATTCCCGGTACGGAAACCAATGGCACCTGGAGGTTTGTGCATGATCTACGAGCTACAAATG  
CTCTTACAAAGCCCATCCCGGCGC

TCTCCCCCGGACCGCCAGACCTTACCGCTATCCCTACACACCTTCCACATATCATTTGCCTAGATCT  
CAAAGATGCCTTCTTCCAGATTC

CAGTCGAAGACCGCTTCCGCTCCTATTTTGCTTTTACCCTCCCTACCCCCGGGGACTCCAACCTC  
ATAGACGCTTTGCCTGGCGGGTCC

TACCTCAAGGCTTCATTAATAGCCCGGCTCTTTTGAACGGGCACTACAGGAACCCCTTCGCCAAG  
TTTCCGCCGCTTCTCCAGTCTC

TTCTGGTGTCTATATGGACGATATCCTTATCGCTTCGCCTACAGAAGAACAACGGTCACAATGTTA  
TCAAGCCCTGGCTGCCCGCCTCC

GGGACCTAGGGTTTTAGGTGGCGTCTGAAAAGACTCGCCAGACGCCTTCGCCCGTCCCCTTCTCTG  
GGACAAATGGTCCATGACCAGATTG

TCACCTATCAGTCCCTACCTACCTTGCAGATCTCATCCCCAATTTCTCTTCACCAATTACAGGCGGT  
CTTGGGAGACCTCCAGTGGGTCT

CCAGGGGCACACCTACTACCCGCCGACCCCTGCAACTTCTCTACTCTTCCCTTAAAGGCATCGATG  
ACCCTAGGGCCACCATCCAGCTTT

CCCCGGAACAGCTACAAGGCATTGCAGAGCTTCGACAAGCCCTGTCCCATAACGCAAGATCTAGAT  
ATAACGAGCAAGAACCCCTGCTGG

CCTACATACACCTAACCCGGGCGGGGTCCACCCTGGTACTCTTCCAAAAGGGCGCTCAATTTCCCC  
TGGCCTACTTTCAGACCCCTTGA

CTGACAACCAAGCCTCACCTTGGGGCCTCCTTCTCCTGCTGGGATGCCAATACCTGCAGACTCAG  
GCCTTAAGCTCTTATGCCAAGCCCA

TACTCAAATACTATCACAATCTTCTAAACCTCTCTCGACAATTGGATTCAATCATCTGAGGACCCT  
CGAGTTCAGGAGTTGTTGCGAT

TGTGGCCCCAGATTTCTCTCAGGGAATACAGCCCCGGGCCCTGGAAGACCTTGATCACCAGG  
GCAGAGGTTTTTTTACGCCCCAGT

TCTCTCCTGAACCGATTCTGCGGCCCTTTGCCTCTTTAGTGACGGGGCTACAGGACGAGGAGCAT  
ATTGCCTGTGGAAGACCACCTTT

TGGACTTTCAGGCCGTTCCGGCTCCAGAGTCCGCCAAAAGGGAGAAGTAGCAGGTCTCTTGGCG  
GGCTTAGCAGCCGCCCCGCCTGAAC

CTTTAAATATATGGGTAGATTCCAAATACCTATACTCCTTGCTCAGAACCCTAGTTCTGGGAGCTTG  
GCTTCAACCTGACCCCGTACCCT

CCTATGCCCTCCTATACAAAAGCCTCCTCCGACATCCAGCAATCTTTGTTGGTCATGTCCGGAGCC  
ACTCCTCAGCATCCCACCCTATTG

CTTCCCTGAACAATTATGTAGATCAACTGCTCCCCTTAGAACTCCAGAGCAATGGCATAAGCTCAC  
CCTGCAACTCTCGGGCCTTGT

CTCGATGGCCGAACCCACGTATTTTCGGCCTGGGATCCCCGTTCCCCCGCTACGCTATGTGAAACC  
TGTCAAAAGCTCAATCCAAGTGGAG

GTGGAAAGATGCGAACTATTCAGAGAGGGTGGGGCCCCGAATCATATTTGGCAGGCCGATATAACC  
CATTATAAATACAAACAGTTCACCT

ACGCTTTGCACGTGTTTGTAGATACTTACTCTGGAGCTACTCATGCCTCAGCAAAGCGAGGGCTCA  
CCTCAAATGACCATTGAGGGCC

TTCTGGAGGCCATAGTACATCTGGGTCGTCCAAAAAGCTAAACACTGACCAAGGCGCAAACCTACA  
CCTCCAAAACCTTTGTCAGGTTTT

GCCAGCAGTTCGGAGTTTCCCTTTCTCATCACGTTCCCTACAACCCACAAAGTTCAGGGTTGGTAG  
AACGGACAAATGGACTGCTCAAAC

TTCTTTTGTCTAAATATCACCTAGACGAACCCACCTTCCCATGACTCAGGCCCTTTCTCGAGCCCT  
CTGGACTCACAATCAGATTAACC

TCCTGCCAATTCTAAAGACCAGATGGGAGTTACACCATTACCCCTACTTGCTGTCATTTAGAGGG  
CGGAGAAACACCCAAGGGCTCTG

ATAAACTCTTTTTGTACAAGCTCCCCGGGCAAACAATCGTCGGTGGCTAGGACCACTCCCCGGCCC  
TAGTCGAAGCCTCGGGAGGCGCCC

TCCTGGCTACTAACCCCCCGTGTGGGTTCCCTGGCGTTTGCTAAAAGCCTTCAAATGCCCAAAGA  
ACGACGGTCCCGAAGACGCCACA

ACCGATCATCAGATGGGTAAGTCTCACTCTTACTCTCCTCGCTCTCTGTGAGCCCATCCAGACTTG  
GAGATGCTCCCTGTCCCTAGGAAA

TCAACAATGGATGACAACATATAACCAAGAGGCCAAAATTTTCCATCGCCATTGACCAAATACTAGAG  
GCTCATAATCAATCGCCTTTCTG

TCCCAGGTCTCCAGATACACCTTGGACTTTGTAAATGGTTATCCTAAGATCTATTGGCCCCCCCCA  
CAAGGGCGACGCCGTTTGGAGC

CAGGGCCATGGTCACATATGATTGCGAGCCCCGATGCCCTTATGTGGGGGCAGATCACTTCGACT  
GCCCCACTGGGACAATGCTTCCA

GGCCGATCAAGGGTCTTTTTATGTCAATCATCAGATTTTATTCTGCATCTCAAACAATGTCATGGA  
ATTTTCACTCTAACCTGGGAAAT

ATGGGGATATGATCCCCTGATCACCTTTTCTTTACATAAAATCCCTGATCCCCTCAACCCGACTTC  
CCTCAGCTGAACAGTGACTGGGT

TCCCTCTGTCAGGTCATGGGCCCTGCTTTTAAATCAAACGGCACGGGCCTTCCCAGACTGTGCTAT  
ATGTTGGGAACCTTCCCCTCCCTG

GGCTCCCGAAATATTAGTATATAACAAAACCATCTCCAACCTCTGGACCCGGTCTCGCCCTCCCGGA  
GCCCCAAATCTTCTGGGTCAACAC

GTCCTTGTTTAAACACCACCCAAGGATGGCACCACCCTTCCCAGAGGTTGTTGTTCAACGTTTCTCAA  
GGCAACGCCTTATTATTACCCCC

TATCTCCCTGGTTAATCTCTCTACGGCTTCTCCGCCCTCCTACCCGGGTCAGACGCAGTCCTGC  
CGCAGCCCTGACCTTGGGCCTAGC

CCTGTGAGTGGGGCTCACTGGAATTAATGTAGCCGTGTCCGCCCTTAGCCATCAGAGACTCACCTC  
CCTGATCCACGTTCTGGAGCAAGA

TCAGCAACGCTTGATCACAGCAATTAACCAGACCCACTATAATTTGCTTAATGTGGCCTCTGTGGTC  
GCCAGAACCGACGGGGGCTAGA

TTGGTTGTACATCCGGCTGGGTTTTCAAAGCCTATGTCCACGATCAATGAACCTTGCTGTTTCTG  
CGCATTCAAATGACTCCATTAT

CCGCCTCGGTGATCTCCAGCCTCTCTCGCAAAGAGTCTCTACAGACTGGCAATGGCCCTGGAATTG  
GGATCTGGGGCTCACCGCCTGGGT

GCGAGAAACCATTCAATTCTGTTCTAAGCCTATTCCTATTAGCCCTTTTTTTGCTCTTCTTGGCCCCCT  
GCCTGATAAAATGCTTGACCTC

TCGCCTTTTAAACTCCTCCGGCAGGCTCCCCACTTCCCTGAAATCTCCTTCCCCCTAAACCCGAT  
TCTGATTATCAGGCCTTGCTACC

ATCCGCGCCAGAGATCTACTCTCACCTCTCCCCACCAAACCCGATTACATCAACCTTCGACCCTG  
CCCTTGACACCCCATGTTTCAGC

CACCCTCAGGCTGTGGTGGGGCACTGGCTTAGTGGAATAGTCAGTGTACCATCACAAGCCTCTTCT  
TGCTGCCAGCGCCGAGTTCAACA

CAGCCCTACCCTGAGCCTCTCTGAGTGCATGACTGAGTGTAGCGCAGAGAGATTGTGCTTCTGC  
GTGTCACTCAGTCATTTTTATAGC

CGATTGGGGTTCGCGCCCTCCCGTTGCCTGTGACACGGTTAAGACCTCTCTCACTTCTGCTTCACC  
ATCCCCCTGCCAGCGTTTGGTCTAG

TGGAAAGAACTAACGCTGACGGGGGCGATTTCTTGCAGCTGTGCTAAGCGAGAGGCTCTGGTGCT  
GGGGATAAGATGCGGCCCTAGCAC

CACAGTCTCTGCGCCTTTTGGGTTTGAATCTTCCCCATGCAGCTTCCGCTTTTTACGCCCTGTTGCA  
CACCTTTCTAGAGATACCTGAA

AATCTCAGCTCGCACCCCAAGGAAGGTTGTGGCTCAGAGGTTAAAATAGCTCGGACCGCAACCTC  
CCTTTCTTTTTATTCCACCCTCGCA

AGGCCCGGGTCTAGACCCCTAACGGAGGTTCAAATTTCTCTACTAGGGGGTGCTCAGGTC  
CAAGTGTGACAAACATCTCTTCCAA

AAGGTCCTGATGAACATCTTCCCATGTAACAAGCCCCAGCAGAGACATTCCAGCCACATCCAGCAG  
CATTGGGCCGCTTCTCTAACAG

TGCCATAAAGTCCCTTCTGTTTCCACAACGGCTGCCTCTGCATCTTCTATTTCCACCTCGGCACCG  
ACTCCCCGCGAGCCCTTCAAG

CTCTTCGGGATCCATTACCTGATAACGACAAAATTATTTCTTGTCTTTTAAGCAAGTGTGTTGGTTG  
GGGGCCCCACTCTCTACATGCC

TGCCCGGCCCTGGTTTTGTCCAATGATGTCACCATCGATGCCTGGTGCCCCCTCTGCGGGCCCCA  
TGAACGACTCCAATTCGAAAGGATC

GACACCAGCTCACCTGCGAGACCCACCGTATCACCTGGACCGCCGATGGACGACCTTTGCGCCT  
CAATGGAACGTTGTTCCCTCGACTG

CATGTCTCCGAGACCCGCCCCAAGGGCCCCGACGACTCTGGATCAACTGCCCCCTTCCGGCCGT  
TCGCGCTCAGCCCGGCCGGTTTCA

CTTCCCCCTTCGAGCAGTCCCCCTTCCAGCCCTACCAATGCCAATTGCCCTCGGCCTCTAGCGAT  
GTTGCCCATCATCGGGCACGGC

CTTCTTCCCTGGAACAGCTTAGTAACGCATCCTGTCCTCGGAAAAGTCCTTACATTAATCAAATGG  
CCAATTTTTCTTACTCCCCC

TTCGATACCCTCCTTGTGGACCCCTCCGGCTGTCCGTCTTTGCCCGGACACTAGGGGAGCCAT  
ACGTTATCTCTCACCTTTTGACG

CTATGCCAGCTACTTGTATTCTACCCCTAGGCGAGCCCTTCTCTCCTAATGTCCCCATATGCCGCT  
TTCCCCGGGACACCAATGAACCT

CCCCTTTCAGAATTCGAGCTGCCCTTATCCAAACGCCCGGCCTGTCTTGGTCTGTCCCCGCGATC  
GACCTATTCCTAACCGGTCCCCCT

TCCCCATGCGACCGGTTACACGTGTGGTCCAGTCCTCAGGCCTTACAACGCTTCTCCATGACCCC  
ACGCTCACCTGGTCAGAATTGGTT

GCTAGCGGGAACTAAGACTTGATTCACCCTTAAAATTACAGCTGTTAGAAAATGAATGGCTCTCCC  
GCCTTTTTTGAGGGGGAGTCATT

TGTATGAAAGATCATGCCGGCCTAGGCGCCGCCACCGCCCCGTAAACCAGACAGAGACGTCAGCT  
GCCAGAAAAGCTGGTGACGGCAGCT

GGTGGCTAGAATCCCCGTACCTCCCCAACTTCCCCTTTCCCGAAAATCCACACCCCGAGCTGCTG  
ACCTCACCTGCTGATAAAACAATA

AAATGCCGGCCCTGTCGAGTTAGCGGCACCAGAAGCGTTCTCCTCCTGAGACCCTCGTGCTCAGC  
TCTCGGTCCTGAGCTCTCTTGCTCC

CGAGACCTTCTGGTCGGCTATCCGGCAGCGGTCAGGTAAGGCAAACCACGGTTTGGAGGGTGGTT  
CTCGGCTGAGACCACCGCGAGCTCT

ATCTCCGGTCCTCTGACCGTCTCCACGTGGACTCTCTCTCTTGCCTCCTGACCCCGCGCTCCAAGG  
GCGTCTGGCTTGCACCCGCGCTTG

TTTCCTGTCTTACTTTCTGTTTCTCGCGGCCCGCGCTCTCTCCTTCGGCGCCCTCTAGCGGCCAGG  
AGAGACCGGCAAACA

**>Bos-1053\_BLV\_consensus 8720 bp**

TGTATGAAAGATCATGCCGACCTAGGCGCCGCCACCGCCCCGTAAACCAGACAGAGACGTCAGCT  
GCCAGAAAAGCTGGTGACGGCAGCT

GGTGGCTAGAATCCCCGTACCTCCCCAACTTCCCCTTTCCCGAAAAATCCACACCCTGAGCTGCTG  
ACCTCACCTGCTGATAAACTAATA

AAATGCCGGCCCTGTCGAGTTAGCGGCACCAGAAGCGTTCTTCTCCTGAGACCCTCGTGCTCAGC  
TCTCGGTCCTGAGCTCTCTTGCTCC

CGAGACCTTCTGGTCGGCTATCCGGCAGCGGTCAGGTAAGGCAAACCACGGTTTGGAGGGTGGTT  
CTCGGCTGAGACCACCGCGAGCTCT

ATCTCCGGTCCTCTGACCGTCTCCACGTGGACTCTCTCCTTTGCCTCCTGACCCCGCGCTCCAAGG  
GCGTCTGGCTTGCACCCGCGTTTG

TTTCCTGTCTTACTTTCTGTTTCTCGCGGCCCGCGCTCTCTCCTTCGGCGCCCTCTAGCGGCCAGG  
AGAGACCGGCAAACAATTGGGGGC

TCGTCCGGGATTGATCACCCCGAACCCTAACAACCTCTCTGGACCCACCCCTCGGCGGCATTTT  
GGTCTCTCCTTCAAATTATATCAT

GGGAAATTCCCCCTCTATAACCCCCCGCTGGTATCTCCCCCTCAGACTGGCTCAACCTTCTGCA  
AAGCGCGCAAAGGCTCAATCCGCG

ACCCTCTCCTAGCGATTTTACCGATTTAAAGAATTACATCCATTGGTTTCATAAGACCCAGAAAAAC  
CATGGACTTTCACCTTCTGGTGG

CCCCACCTCATGTCCACCCGGGAGATTGGCCGGGTTCCCCTTGTCTTGGCCACCCTAAACGAAG  
TGCTCTCAAACGAAGGGGGCGCCCC

GGGTGCATCGGCCCCAGAAGAACAACCCCCCCTTATGACCCCCCGCGTTTTTGCCAATCATAT  
CTGAAGGAATCGCAACCGCCATCG

TGCTTGGGCACTCCGAGAATTACAAGATATCAAAAAGGAAATTGAAAATAAGGCACCGGGTTCGCA  
AGTATGGATACAAACTACGACT

TGCAATCCTGCAGGCCGACCCTACTCCGGCTGACTTAGAACAACCTTTGCCAATATATTGCTTCCCC  
GGTGCACCAAACGGCCCATATGAC

CAGCCTAACGGCAGCAATTGCCGCGCTGAAGCGGCCAACACCCTCCAGGGTTTTAACCCCAA  
ACGGGACCCTAACCAACAATCAGC

TCAGCCCAACGCCGGGATCTTAGAAGTCAATATCAAAACCTCTGGCTTCAGGCCTGGAAAAATCT  
CCCTACTCGTCCTTCAGTACAACC

TTGGTCCACCATCGTCCAAGGCCCGCCGAAAGCTATGTAGAGTTTGTCAACCGGTTACAAATTTT  
ATTAGCTGACAACCTTCCCGACGG

AGTCCCTAAGGAACCCATTATTGACTCCCTTAGTTATGCAAATGCTAACAAAGAGTGTGAGCAAAAT  
TTGCAAGGGCGAGGCCTAGTGGC

CGCCCCGGTGGGGCAAAGCTGCAGGCTTGCACATTGGGCCCCCAAGATGAAACAGCCTGCA  
ATTCTCGTCCACACCCCAAGGCCCAA

GATGCCCGGGCCTCGGCAACCGGCCCCCAAAGGCCTCCCCAGGACCATGCTATCGATGCCTC  
AAAGAAGGCCATTGGGCCCGGATTG

TCCTACCAAGGCCACCGGCCCCCTCCGGGACCTTGCCCCATATGTAAAGATCCTTCCCATTGGAA  
ACGAGACTGTCCAACCCCTCAAATC

AAAAAATAATAGAGGGGGGACTTAGCGCCCCCAAACCATAACACCCATAACAGATTCTCTTAGT  
GAGGCCGAATTAGAATGCTTACTT

TCTATTCTCTGGCTCGCAGCCGTCCCTCCGTGGCTGTATACCTGTCTGGCCCCTGGCTGCAGCC  
CTCTCAGAATCAAGCCCTCATGCTT

GTGGACACCGGGGCTGAAAATACGGTTCTCCACAAAATTGGCTGGTTCGGGATTACCCACGGAT  
CCCCGCCGCAGTGCTCGGAGCAGGG

GGAGTCTCCCGGAACAGATACAATTGGCTACAAGGCCCTCTGACCCTGGCTCTAAAACCAGAGGG  
TCCCTTTATCACCATCCCAAAAATT

TTAGTTGACACTTTGACAAAATGGCAAATTTTAGGACGGGACGTCTCTCCCGCCTACAGGCCTCT  
ATCTCCATACCTGAGGAAGTACGC

CCCCCTGTGGTAGGCGTCTTGGATGCCCCCCGAGCCACATTGGATTAGAACATCTGCCCCCTCC  
ACCTGAGGTGCCTCAATTCCCTTTA

AACTAGAACGCCTCCAGGCCCTTCAAGACCTGGTCCATCGCTCTCTGGAGGCAGGTTATATCTCCC  
CCTGGGACGGGCCAGGCAATAATC

CAGTCTTCCCGGTACGGAAACCAAATGGCGCCTGGAGGTTTGTGCATGACCTACGAGCTACAAATG  
CTCTTACAAAGCCATTCCGGCAC

TCTCCCCGGACCGCCAGACCTTACCGCTATCCCTACACACCTTCCACATATCATTTGCCTAGATCT  
CAAAGACGCCTTCTTCCAGATTC

CAGTCGAAGACCGCTTCCGCTCCTACTTTGCTTTTACCCTCCCTACCCCCGGGGACTCCAACCTC  
ATAGACGCTTTGCCTGGCGGGTCC

TACCTCAAGGCTTCATTAACAGCCCAGCTCTTTTGAACGAGCACTACAGGAACCTCTTCGCCAAG  
TTTCCGCCGCTTTTCCAGTCTC

TTCTGGTGTCTATATGGACGATATCCTTATCGCTTCGCCTACAGAAGAACAGCGGTACAAATGTTA  
TCAAGCCCTGGCTGCCCGCCTCC

GGGACCTAGGGTTTCAGGTGGCATCCGAAAAGACTCGCCAGACGCCTTCGCCCGTCCCCTTCTTG  
GGACAAATGGTCCATGAGCAGATTG

TCACCTACCAGTCCCTACCTACCTTGACAGATCTCATCCCCAATTTCTCTTACCAATTACAGGCGGT  
CTTAGGAGACCTCCAATGGGTCT

CTAGGGGCACACCCACTACCCGCCGGCCCTGCAACTTCTCTACTCTTCCCTTAAAGGCATCGATG  
ACCCTAGGGCCATCATCCAGCTTT

CCCCGGAACAGCTGCAAGGCATTGCAGAGCTTCGACAAGCCCTGTCCCATAACGCAAGATCTAGA  
TATAACGAGCAAGAACCCCTGCTAG

CCTACGTACACCTAACCCGGGCGGGGTCCACCCTGGTACTCTTCCAAAAGGGCGCTCAATTTCCC  
CTGGCCTACTTCCAGACCCCTTGA

CTGACAACCAAGCCTCACCTTGGGGCCTCCTTCTCCTGCTGGGATGCCAATACCTGCAGACTCAG  
GCCTTAAGCTCGTATGCCAAGCCCA

TACTTAAATATTATCACAACTTCTCCTAAAACCTTCTCTAGACAATTGGATTCAATCATCTGAGGACCCT  
CGAGTCCAGGAGTTGCTGCAAT

TGTGGCCCCAGATTTCTCTCAGGGAATACAGCCCCGGGCCCTTGAAGACCTTAATCACCAGG  
GCAGAGGTTTTTTTACGCCCCAGT

TCTCCCCTGATCCGATTCCTGCGGCCCTTTGCCTCTTTAGTGACGGGGCTAAAGGACGAGGAGCAT  
ATTGCTTGTGGAAAGACCACCTTT

TAGACTTTTACAGCCGTTCCGGCTCCAGAATCCGCTCAAAGGGAGAACTAGCAGGTCTCTTGGCG  
GGCTTGGCAGCCGCCCCGCCTGAAC

CTGTAAATATATGGGTAGATTCCAAATACCTGTACTCTTTGCTCAGAACCCTAGTTCTGGGAGCTTG  
GCTTCAACCTGACCCCGTACCCT

CCTACGCCCTCCTATATAAAAGCCTCCTCCGACATCCAGCAATCTTTGTTGGCCATGTCCGGAGCC  
ACTCTTCAGCATCCCACCCTATTG

CTTCCCTGAACAATTATGTAGATCAACTGCTTCCCTTAGAACTCCAGAGCAATGGCATAAGCTCAC  
CCTGCAACTCTCGGGCCTTGT

CTCGATGGCCGAACCCACGTATCTCTGCCTGGGACCCCGTTCCCCCGCTACGCTGTGTGAAACC  
TGTCAAAGCTTAATCCAACCTGGAG

GAGGAAAGATGCGAACTATTCAGAGAGGGTGGGCCCCGAACCATATTTGGCAGGCCGATATAACC  
CATTATAAATACAAACAGTTCACCT

ACGCTCTGCATGTGTTTGTAGATACTTACTCTGGAGCTACTCATGCCTCGGCGAAGCGTGGGCTCA  
CCTCAAATGACCATTGAGGGCC

TTCTTGAGGCCATAGTGCATCTGGGTCGTCCAAAAGGCTAAACACTGACCAAGGTGCAAACCTACA  
CCTCCAAAACCTTTGTCAGGTTTT

GCCAGCAGTTCGGAGTTTCCCTTTCTCATCATGTTCCCTACAACCCACAAAGTTCGGGGTTAGTAG  
AACGGACAAATGGAAGTCTCAAC

TTCTTCTATCTAAATATCACCTAGACGAACCCACCTTCCCATGACTCAGGCCCTTTCTCGAGCCCT  
CTGGACTACAATCAGATTAACC

TCCTACCAATTCTAAAGACCAGATGGGAGCTACACCATTACCCCCACTTGCTGTCATTTAGAGG  
GCGGAGAAACACCCAAGGGCTCTG

ATAAACTCTTTTTGTACAAGCTCCCCGGGCAAACAATCGTCGGTGGCTAGGACCACTCCCCGGCCC  
TAGTCGAAGCCTCGGGAGGCGCTC

TCCTGGCTACTGACCCCGCGTGTGGGTTCCCTGGCGTTTGTGAAAGCCTTCAAATGCCTAAAGA  
ACGACGGTCCCGAAGACGCCACA



ACCGATCATCAGATGGGTAAAGTCTCACTCTCACTCTCCTCGCTCTCTCTCGGCCATCCAGACTTG  
GAGATGCTCCCTGTCCCTAGGAAA

CCAACAATGGATGACAGCATATAACCAAGAGGCAGAATTTTCCATCTCCATTGACCAAATACTAGAG  
GCTCATAATCAGTCACCTTTCTG

TGCCAAGTCTCCCAGATACACCTTGGACTCTGTAAATGGCTATCCTAAGATCTACTGGCCCCCCC  
ACAAGGGCGGCGCCGTTTGGAGC

CAGGGCCATGGTCACATATGATTGCGAGCCCCGATGCCCTTATGTGGGGGCAGATCGCTTCGACT  
GCCCCACTGGGACAATGCCTCCA

GGCCGATCAAGGATCCTTTTATGTCAATCATCAGATTTTATTCTGCATCTCAAACAATGTCATGGAA  
TTTTCACTCTAACCTGGGAGAT

ATGGGGATATGATCCCCTGATCACCTTTTCTTTACATAAGATCCCTGATCCCCCTCAACCCGACTTT  
CCCAGTTGAACAGTGACTGGGT

TCCCTCTGTCAGATCATGGGCCCTGCTTTTAAATCAAACAGCACGGGCCCTTCCCAGACTGTGCTAT  
ATGTTGGGAACCTTCCCCTCCCTG

GGCTCCCGAAATATTAGTATATAACAAAACCATCTCCAGCTCTGGACCCGGCCTCGCCCTCCCGGA  
CGCCCAAATCTTCTGGGTCAACGC

GTCCTCGTTTAAACACCACCCAAGGATGGCACCACCCTTCCCAGAGGTTGTTGTTCAATGTTTCTCAA  
GGCAACGCCTTGTATTACCTCC

TATCTCCCTGGTTAATCTCTCTACGGCTTCTCCGCCCTCCTACCCGGGTCAGACGTAGTCCCGT  
CGCAGCCCTGACCTTAGGCCTAGC

CCTGTCAGTGGGGCTCACTGGAATTAATGTGGCCGTGTCTGCCCTTAGCCATCAGAGACTCACCTC  
CCTGATCCACGTTCTGGAGCAAGA

TCAGCAACGCTTGATCACAGCAATTAACCAGACCCACTATAATTTGCTTAATGTGGCCTCTGTGGTT  
GCCAGAACCGACGGGGGCTTGA

TTGGTTATACATCCGGCTGGGTTTTCAAAGCCTATGTCCCACAATTAATGAGCCTTGCTGTTTCTG  
CGCATTCAAATGACTCCATTAT

CGCCTCGGTGATCTCCAGCCTCTCTCGCAAAGAGTCTCTACAGACTGGCAGTGGCCCTGGAATT  
GGGATCTGGGGCTCACTGCCTGGGT

GCGAGAAACCATTCTATTCTGTTCTAAGCCTGTTCTATTAGCCCTTTTTTTGCTCTTCTGGCCCC  
TGCTGATAAAATGCTTGACCTC

TCGCCTTTTAAAGCTCCTCCGGCAGGCTCCCCACTTCCCTGAAATCTCCTTAACCCCTAAACCCGAT  
TCTGATTATCAGGCCTTGCTACC

ATCTGCACCAGAGATCTACTCTCACCTCTCCCCGTCAAACCCGATTACATCAACCTCCGACCCTG  
CCCTTGATACCCCGCGTTTCAGC

CACCCCAGGCTGTGGTGGTGCACCTGGCTTAGTGGAATAGTCAGTGTACCATCACAAGCCTCTTCT  
TGCTGCCGGCACCGAGTTCGAACA

CAGCCCTACCCTGAACCTCTCTGAGTGCATGACTGAGTGTAGCGCAGAGAGATTGTCGCTTCTGCG  
TGTCGCTCAGTCATTTTTTATAGC

CGATTGGGGTTTCGCGCCCTTCCGTTGCCTGTGACACAGATAAGACCTCTCTCACTTCTGCTTCACC  
ATCCCCCTGCCAGCGTTGGTCTAG

TGGAAAGAACTAACGCTGACGGGGGCGATTTCTTGCAGCTGTGCTAGCGGGAGGCTCTGGTGCTG  
GGGATAAGATGTGGCCCTTAGCACC

ACAGTCTCTGCGCCTTTTGGGTTTGAATCTTCCCCACGCAGCTTCCGCTTTTACGCCCTGTTGCA  
CACCTTTCTAGAGATACCTGAAA

ATCTCAGCTCGCACCTGAGGAAGGTTGTGGCTCAGAGGTTAAAATAGCTCGAGCCGCAACCTCC  
CTTTCTTTTATTCCACCCTCGCAA

GGCCCCGGGTTCTGAGCCCCCTAACGGAGGTTCAAATTTCTCTACTAGGGGATGCTCGGGTCC  
AAGTGTGCACAATATCTCTTCCAAA

AGGTCTGATGAACGTCTTCCCATGTAACAAGCCCCAGCAGAGACATTCCAGCCACATCCAGCAGC  
ATTTGGGCCGCTTTTCTAACAGT

GCCATAAAGTCCCTTCCGTTTCCACAACGGCTGCCTCTGCTTCTTCTATTTCCACCTCGGCACCG  
ACTCCCCGCCGAGCCCTTCGAGC

TCTTCGGGATCCATTACCTGATAACGACAAAATTATTTCTTGTCTTTAAGCAAGTGTTGTTGGTGG  
GGGCCCACTCTCTACATGCCT

GCCCCGGCCCTGGTTTTGTCCAATGATGTCACCATCGATGCCTGGTGCCCCCTCTGCGGGCCCCAT  
AAGCGACTCCAATTCGAAAGGATCG

ACACCAGCTCACCTGCGAGACCCACCGTATCAACTGGACCGCCGATGGACGACCTTGCGGCCTC  
AATGGAACGTTGTTCCCTCGACTAC

ATGTCTCCGAGACCCGCCCCAAAGGGCCCCGACGACTCTGGATCAACTGCCCCCTTCCGGCCGTT  
CGCGCTCAGCCGGCCCGTTTAC

TTTCCCCCTTCGAGCGGTCCCCCTTCCAGCCCTACCAATGCCAATTGCCCTCGGCCTCTAGCGACG  
GTTGCCCAATTATCGGGCACGGCC

TTCTTCCCTGGAACAACCTTAGTAACGCATCCTGTCTCGGAAAAGTCCTTATATTAATCAAATGGC  
CAATTTTCTTACTCCCCCTCT

TCGATACCCTCCTTGTGGACCCCCTCCGGCTGTCCGTCTTTGCCCCAGACACCAGGGGAGCCATA  
CGTTATCTCTCCACCCTTTTGACGC

TATGCCAGCTACTTGTATTCTACCCCTAGGCGAGCCCTTCTCTCCTAATGTCCCCATATGCCGCTT  
TCCCCGGGACTCCAATGAACCCC

CCTTTTCAGAATTCGAGCTGCCCTTATCCAAACGCCCGGCCTGTCTGCTGTCCCCGCGATCG  
ACCTATTTCTAACCGGTCCCCCTT

CCCCATGCGACCGGTTACACGTATGGTCCAGTCCTCAGGCCTTACAGCGCTTCCTTCATGACCCTA  
CGCTAACCTGGTCCGAATTGGTTG

CTAGCAGAAAGATAAGACTTGATTCCCCCTTAAAATTACAACCTGCTAGAAAATGAATGGCTCTCCCG  
CCTTTTTTGAGGGGGAGTCATT

GTATGAAAGATCATGCCGACCTAGGCGCCGCCACCGCCCCGTAAACCAGACAGAGACGTCAGCTG  
CCAGAAAAGCTGGTGACGGCAGCTG

GTGGCTAGAATCCCCGTACCTCCCCAACTTCCCCTTTCCCGAAAAATCCACACCCTGAGCTGCTGA  
CCTCACCTGCTGATAAACTAATAA

AATGCCGGCCCTGTGAGTTAGCGGCACCAGAAGCGTTCTTCTCCTGAGACCCTCGTGCTCAGCT  
CTCGGTCCTGAGCTCTTTGCTCCC

GAGACCTTCTGGTCGGCTATCCGGCAGCGGTCAGGTAAGGCAAACCACGGTTTGGAGGGTGGTTC  
TCGGCTGAGACCACCGCGAGCTCTA

TCTCCGGTCCTCTGACCGTCTCCACGTGGACTCTCTCCTTTGCCTCCTGACCCCGCGCTCCAAGG  
GCGTCTGGCTTGCACCCGCGTTTGT

TTCCTGTCTTACTTTCTGTTTCTCGCGGCCCGCGCTCTCTCCTTCGGCGCCCTCTAGCGGCCAGGA  
GAGACCGGCAAACA

**>Bos-1439\_BLV\_consensus 8720 bp**

TGTATGAAAGATCATGCCGACCTAGGCGCCGCCACCGCCCCGTAAACCAGACAGAGACGTCAGCT  
GCCAGAAAAGCTGGTGACGGCAGCT

GGTGGCTAGAATCCCCGTACCTCCCCAACTTCCCCTTTCCCGAAAAATCCACACCCTGAGCTGCTG  
ACCTCACCTGCTGATAAATTAATA

AAATGCCGGCCCTGTGAGCTAGCGGCACCAGAAGCGTTCTTCTCCTGAGACCCTCGTGCTCAGC  
TCTCGGTCCTGAGCTCTCTTGCTCC

CGAGACCTTCTGGTCGGCTATCCGGCAGCGGTCAGGTAAGGCAAACCACGGTTTGGAGGGTGGTT  
CTCGGCTGAGACCACCGCGAGCTCT

ATCTCCGGTCCTCTGACCGTCTCCACGTGGACTCTCTCCTTTGCCTCCTGACCCCGCGCTCCAAGG  
GCGTCTGGCTTGCACCCGCGTTTG

TTTCCTGTCTTACTTTCTGTTTCTCGCGGCCCGCGCTCTCTCCTTCGGCGCCCTCTAGCGGCCAGG  
AGAGACCGGCAAACAATTGGGGGC

TCGTCCGGGATTGATCACCCCGGAACCCCTAACAACTCTCTGGACCCACCCCTCGGCGGCATTTT  
GGTCTCTCCTTCAAATTATATCAT

GGGAAATTCCCCTCCTATAACCCCCCGCTGGTATCTCCCCTCAGACTGGCTCAACCTTCTGCA  
AAGCGCGCAAAGGCTCAATCCGCG

ACCCTCTCCTAGCGATTTTACCGATTTAAGAATTACATCCATTGGTTTCATAAGACCCAGAAAAAAC  
CATGGACTTTCCTTCTGGTGG

CCCCACCTCATGTCCACCCGGGAGATTGCGCCGGGTTCCCCTTGTCTTGGCCACCCTAAACGAAG  
TGCTCTCAAACGAAGGGGGCGCCCC

GGGTGCATCGGCCCCAGAAGAACAACCCCCCTTATGACCCCCCGCCGTTTTGCCAATCATAT  
CTGAAGGGAATCGCAACCGCCATCG

TGCTTGGGCACTCCGAGAATTACAAGATATCAAAAAGGAAATTGAAAATAAGGCACCGGGTTTCGCA  
AGTATGGATACAAACTACGACT

TGCAATCCTGCAGGCCGACCCTACTCCGGCTGACCTAGAACAACCTTTGCCAATATATTGCTTCCCC  
GTTCGACCAAACGGCCATATGAC

CAGCCTAACGGCAGCAATAGCCGCGCTGAAGCGGCCAACACCCTCCAGGGTTTTAACCCCAA  
ACGGGACCCTAACCAACAATCCGC

TCAGCCCAACGCCGGGATCTTAGAAGTCAATATCAAAACCTCTGGCTTCAGGCCTGGAAAAATCT  
CCCTACTCGTCTTCAGTACAACC

TTGGTCCACCATCGTCCAAGGCCCGCCGAAAGCTATGTAGAGTTTGTCAACCGGTTACAAATTT  
ATTAGCTGACAACCTTCCCGACGG

AGTCCCTAAGGAACCCATTATTGACTCCCTTAGTTATGCAAATGCTAACAAAGAGTGTCAGCAAATT  
TTGCAGGGGCGAGGCCTAGTGCC

CGCCCCGGTGGGGCAAACACTGCAGGCTTGCGCACATTGGGCCCCCAAGATGAAACAGCCTGCAA  
TTCTCGTCCACACCCAGGGCCCAA

GATGCCCGGGCCTCGGCAACCGGCCCCCAAAGGCCTCCCCAGGACCATGCTATCGATGCCTC  
AAAGAAGGCCATTGGGCCCGGGATTG

TCCTACCAAGGCCACCGGCCCCCTCCGGGACCTTGCCCCATATGTAAAGATCCTTCCCATTGGAA  
ACGAGACTGTCCAACCCTCAAATC

AAAAAACTAATAGAGGGGGGACTTAGCGCCCCCAAACCATAACACCTATAACAGATTCTCTTAGT  
GAGGCCGAATTAGAATGCTTACTT

TCTATTCTCTGGCTCGCAGCCGTCCCTCCGTGGCTGTATACCTGTCTGGCCCCCTGGCTGCAGCC  
CTCTCAGAATCAAGCCCTCATGCTT

GTGGACACCGGGGCTGAAAATACGGTTCTCCACAAAATTGGCTGGTTCGAGATTACCCACGGATC  
CCCGCCGAGTGCTCGGAGCAGGG

GGAGTCTCCCGGAACAGATAACAATTGGCTACAAGGCCCTCTGACCCTGGCTCTAAAACCAGAGGG  
TCCCTTTATCACCATCCCAAAAATT

TTAGTTGACACTTTTCGACAAATGGCAAATTTTAGGACGGGACGTTCTCTCCCGCCTACAGGCCTCTA  
TCTCCATACCTGAGGAAGTACGC

CCCCCTGTGGTAGGCGTCTTGGATGCCCCCCCGAGCCACATTGGATTAGAACATCTGCCCCCCC  
ACCTGAGGTGCCTCAATTCCCTTTA

AACTAGAACGCCTCCAGGCCCTTCAAGACCTGGTCCATCGCTCTCTGGAGGCAGGTTATATCTCCC  
CCTGGGACGGGCCAGGCAATAATC

CAGTCTTCCCGGTACGGAAACCAAATGGCGCCTGGAGGTTTGTGCATGACCTACGAGCTACAAATG  
CTTTACAAAGCCATTCCGGCAC

TCTCCCCGGACCGCCAGACCTTACCGCTATCCCTACACACCTTCCACATATCATTTCCTAGATCT  
CAAAGATGCCTTCTTCCAGGTTT

CAGTCGAAGACCGCTTCCGCTCCTACTTTGCTTTCACCCTCCCTACCCCCGGGGACTCCAACCTC  
ATAGACGCTTTGCCTGGCGGGTCC

TACCTCAAGGCTTCATTAACAGCCCAGCTCTTTTGAACGAGCACTACAGGAACCTCTTCGCCAAG  
TTTCCGCCGCTTTTCCAGTCTC

TTCTGGTGTCTATATGGACGATATCCTTATCGCTTCGCCTACAGAAGAAGAGCGGTACAAATGTTA  
TCAAGCCCTGGCTGCCCGCCTCC

GGGACCTAGGGTTTCAGGTGGCATCCGAAAAGACTCGCCAGACGCCTTCGCCCGTCCCCTTCTTG  
GGACAAATGGTCCATGAGCAGATTG

TCACCTACCAGTCCCTACCTACCTTGAGATCTCATCCCCAATTTCTTTCACCAATTACAGGCGGT  
CTTAGGAGACCTCCAATGGGTCT

CTAGGGGCACACCCACTACCCGCCGGCCCTGCAACTTCTTACTCTTCCCTTAAAGGCATCGATG  
ACCCTAGGGCCATCATCCAGCTTT

CCCCGGAACAGCTGCAAGGCATTGCAGAGCTTCGACAAGCCCTGTCCATAACGCAAGATCTAGA  
TATAACGAGCAAGAACCCTGCTAG

CCTACGTACACCTAACCCGGGCGGGGTCCACCCTGGTACTCTTCCAAAAGGGCGCTCAATTTCCC  
CTGGCCTACTTTCAGACCCCCTTGA

CTGACAACCAAGCCTCACCTTGGGGCCTCCTTCTCCTGCTGGGATGCCAATACCTGCAGACTCAG  
GCCTTAAGCTCGTATGCCAAGCCCA

TACTTAAATATTATCACAATCTTCCTAAAACCTCTCTAGACAATTGGATTCAATCATCTGAGGACCCT  
CGAGTCCAGGAGTTGCTGCAAT

TGTGGCCCCAGATTTCTCCTCAGGGAATACAGCCCCGGGCCCTTGGAAGACCTTAATCACCAGG  
GCAGAGGTTTTTTTTGACGCCCCAGT

TCTCCCCTGATCCGATTCTGCGGCCCTTTGCCTCTTTAGTGACGGGGCTACAGGACGAGGAGCA  
TATTGCTTGTGGAAAGACCACCTTT

TAGACTTTTCAGGCCGTTCCGGCTCCAGAATCCGCTCAAAGGGAGAAGTAGCAGGTCTCTTGGCG  
GGCTTAGCAGCCGCCCCGCCTGAAC

CTGTAAATATATGGGTAGATTCCAAATACCTGTACTCTTTGCTCAGAACCCTAGTTCTGGGAGCTTG  
GCTTCAACCTGACCCCGTACCCT

CCTACGCCCTCCTATATAAAAGCCTCCTCCGACATCCAGCAATCTTTGTTGGTCATGTCCGGAGCC  
ACTCTTCAGCATCCCACCCTATTG

CTTCCCTGAACAATTATGTAGATCAACTGCTTCCCTTAGAAACTCCAGAGCAATGGCATAAGCTCAC  
CCTGCAACTCGCGGGCCTTAT

CTCGATGGCCGAACCCACGTATCTCTGCCTGGGACCCCGTTCCCCCGCTACGCTGTGTGAAACC  
TGTCAAAAGCTTAATCCAAGTGGAG

GAGGAAAGATACGAACCTTTCAGAGAGGGTGGGCCCCGAATCATATTTGGCAGGCCGATATAACC  
CATTATAAATACAAACAGTTCACCT

ACGCTCTGCATGTGTTTGTAGATACTTACTCTGGAGCTACTCATGCCTCGGCGAAGCGTGGGCTCA  
CCTCAAATGACCATTGAGGGCC

TTCTTGAGGCCATAGTGCATCTGGGTCGTCCAAAAAGCTAAACACTGACCAAGGTGCAAACCTACA  
CCTCCAAAACCTTTGTCAGGTTTT

GCCAGCAGTTTCGGAGTTTCCCTTTCTCATCATGTTCCCTACAACCCACAAAGTTCGGGGTTAGTAG  
AACGGACAAATGGACTGCTCAAAC

TTCTTCTATCTAAATATCACCTAGACGAACCCACCTTCCCATGACTCAGGCCCTTTCTCGAGCCCT  
CTGGACTCACAATCAGATTAACC

TCCTACCAATTCTAAAGACCAGATGGGAGCTACACCATTACCCCCACTTGCTGTCATTTTCAGAGG  
GCGGAGAAACACCCAAGGGCTCTG

ATAAACTCTTTTTGTACAAGCTCCCCGGGCAAACAATCGTCGGTGGCTAGGACCACTCCCCGGCCC  
TAGTTGAAGCCTCGGGAGGCGCTC

TCCTGGCTACTGACCCCCCGTGTGGGTTCCCTGGCGTTTGTCTGAAAGCCTTCAAATGCCTAAAGA  
ACGACGGTCCCGAAGACGCCACA

ACCGATCGTCAGATGGGTAAGTCTCACTCTCACTCTCCTCGCTCTCTGTCTGGCCCATCCAGACTTG  
GAGATGCTCCCTGTCCCTAGGAAA

CCAACAATGGATGACAGCATATAACCAAGAGGCAAATTTTCCATCTCCATTGACCAAATACTAGAG  
GCTCATAATCAGTCACCTTTCTG

TGCCAAGTCTCCCAGATACACCTTGGACTCTGTAATGGCTATCCTAAGATCTACTGGCCCCCCC  
ACAAGGGCGGCGCCGTTTGGAGC

CAGGGCCATGGTCACATATGATTGCGAGCCCCGATGCCCTTATGTGGGGGCAGATCGCTTCGACT  
GCCCCACTGGGACAATGCCTCCA

GGCCGATCAAGGGTCCTTTTATGTCAATCATCAGATTTTATTCTGCATCTCAAACAATGTCATGGA  
ATTTTCACTCTAACCTGGGAGAT

ATGGGGATATGATCCCCTGATCACCTTTTCTTTACATAGGATCCCTGATCCCCCTCAACCCGACTTT  
CCCCGGTTGAGCAGTGAAGTGGT

TCCCTCTGTCAGATCATGGGCCCTGCTTTTAAATCAAACAGCACGGGCCCTTCCCAGACTGTGCTAT  
ATGTTGGGAACCTTCCCCTCCCTG

GGCTCCCGAAATATTAGTATATAACAAAACCATCTCCAGCTCTGGACCCGGCCTCGCCCTCCCGGA  
CGCCAAATCTTCTGGGTCAACAC

GTCCTCGTTTAAACACCACCAAGGATGGCACCACCCTTCCCAGAGGTTGTTGTTCAATGTTTCTCAA  
GGCAACGCCTTGTATTACCTCC

TATCTCCCTGGTTAATCTCTCTACGGCTTCTCCGCCCTCCTACCCGGGTCAGACGTAGTCCCGT  
CGCAGCCCTGACCTTAGGCCTAGC

CCTGTCAAGTGGGGCTCACTGGAATTAATGTGGCCGTGTCTGCCCTTAGCCATCAGAGACTCACCTC  
CCTGATCCACGTTCTGGAGCAAGA

TCAGCAACGCTTGATCACAGCAATTAACCAGACCCACTATAATTTGCTTAATGTGGCCTCTGTGGTT  
GCCAGAACCGACGGGGGCTTGA

TTGGTTGTACATCCGGCTGGGTTTTCAAAGCCTATGTCCACAATTAATGAGCCTTGCTGTTTCTCG  
CGCATTCAAATGACTCCATTAT

CCGCCTTGGTGATCTCCAGCCTCTCTCGCAAAGAGTCTCTACAGACTGGCAGTGGCCCTGGAATTG  
GGATCTGGGGCTCACTGCCTGGGT

GCGAGAAACCATTCTATTCTGTTCTAAGCCTGTTTCTATTAGCCCTTTTTTTGCTCTTCTGGCCCC  
TGCCTGATAAAATGCTTGACCTC

TGCCTTTTTAAAGCTCCTCCGGCAGGCTCCCCACTTCCCTGAAATCTCCTTAACCCCTAAACCCGAT  
TCTGATTATCAGGCCTTGCTACC

ATCTGCACCAGAGATCTACTCTCACCTCTCCCCCGTCAAACCCGATTACATCAACCTCCGACCCTG  
CCCTTGATACCCCGCGTTTCAG

CACCCCCAGGCTGTGGTGGTGCCTTAGTGGAATAGTCAGTGTACCATCACAAGCCTCTTCT  
TGCTGCCAGCACCGAGTTCAACA

CAGCTCTACCCTGAGCCTCTCTGAGTGCATGACTGAGTGTAGCGCAGAGAGATTGTCGCTTCTGCG  
TGTCGCTCAGTCATTTTTTATAGC

CGATTGGGGTTCGCGCCCTTCCGTTGCCTGTGACACAGATAAGACCTCTCTCACTTCTGCTTACC  
ATCCCCCTGCCAGCGTTGGTCTAG

TGAAAGAACTAACGCTGACGGGGGCGATTTCTTGCAGCTGTGCTAGCGGGAGGCTCTGGTGCTG  
GGGATAAGATGTGGCCCTTAGCACC

ACAGTCTCTGCGCCTTTTTGGGTTTGAATCTTCCCACGCAGCTTCCGCTTTTTTACGCCCTGTTGCA  
CACCTTTCTAGAGATACCTGAAA

ATCTCAGCTCGCACCCCTGAGGAAGGTTGTGGCTCAGAGGTTAAAATAGCTCGAGCCGCAACCTCC  
CTTTCTTTTTATTCCACCCTCGCAA

GGCCCCGGGTTCTGAGCCCCCTAACGGAGGTTCAAATTTCTCTACTAGGGGATGCTCGGGTCC  
AAGTGTGCACAATATCTCTTCCAAA

AGGTCTGATGAACGTCTTCCCATGTAACAAGCCCCAGCAGAGACATTCCAGCCACATCCAGCAGC  
ATTTGGGCCGCCTTTTCTAACAGT

GCCATAAAGTCCCTTCCGTTTCCACAACGGCTGCCTCTGCATCTTCTATTTCCACCTCGGCACCG  
ACTCCCCCGCCGAGCCCTTCGAGC

TCTTCGGGATCCATTACCTGATAACGACAAAATTATTTCTTGTCTTTAAGCAAGTGTGTTGGTTGG  
GGGCCCACTCTCTACATGCCT

GCCCGGCCCTGGTTTTGTCCAATGATGTCACCATCGATGCCTGGTGCCCCCTCTGCGGGCCCCAT  
GAGCGACTCCAATTCGAAAGGATCG

ACACCACGCTCACCTGCGAGACCCACCGTATCAACTGGACCGCCGATGGACGACCTTGCGGCCTC  
AATGGAACGTTGTTCCCTCGACTGC

ATGTCTCCGAGACCCGCCCCCAAGGGCCCCGACGACTCTGGATCAACTGCCCCCTTCCGGCCGTT  
CGCGCTCAGCCCGGCCCGTTTAC

TTTCCCCCTTCGAGCGGTCCCCCTTCCAGCCCTACCAATGCCAATTGCCCTCGGCCTCTAGTGACG  
GTTGCCCAATTATCGGGCACGGCC

TTCTTCCCTGGAACAACCTTAGTAACGCATCCTGTCTCGGAAAAGTCCTTATATTAATCAAATGGC  
CAATTTTCTTACTCCCCTCCT

TCGATACCCTCCTTGTGGACCCCTCCGGCTGTCCGTCTTTGCCCCAGACACCAGGGGAGCCATA  
CGTTATCTCTCCACCCTTTTGACGC

TATGCCAGCTACTTGTATTCTACCCCTAGGCGAGCCCTTCTCTCCTAAGGTCCCCATATGCCGCTT  
TCCCCGGGACTCCAATGAACCCC

CCTTTTCAGAATTCGAGCTGCCCTTATCCAAACGCCCGGCCTGTCTTGGTCTGTCCCCGCGATCG  
ACCTATTCTAACCAGTCCCCCTT

CCCCATGCGACCGGTTACACGTATGGTCCAGTCCTCAGGCCTTACAGCGCTTCCTTCATGACCCTA  
CGTAACCTGGTCCGAATTGGTTG

CTAGCAGAAAAATAAGACTTGATTCCCCCTTAAAATTACAACCTGCTAGAAAATGAATGGCTCTCCCG  
CCTTTTTTGGAGGGGAGTCATT

GTATGAAAGATCATGCCGACCTAGGCGCCGCCACCGCCCCGTAAACCAGACAGAGACGTCAGCTG  
CCAGAAAAGCTGGTGACGGCAGCTG

GTGGCTAGAATCCCCGTACCTCCCCAACTTCCCCTTTCCCGAAAAATCCACACCCTGAGCTGCTGA  
CCTCACCTGCTGATAAATTAATAA

AATGCCGGCCCTGTCGAGCTAGCGGCACCAGAAGCGTTCTTCTCCTGAGACCCTCGTGCTCAGCT  
CTCGGTCTGAGCTCTTGTCTCC

GAGACCTTCTGGTCCGCTATCCGGCAGCGGTCAGGTAAGGCAAACCACGTTTTGGAGGGTGGTTC  
TCGGCTGAGACCACCGCGAGCTCTA

TCTCCGGTCTCTGACCGTCTCCACGTGGACTCTCTCCTTTGCCTCCTGACCCCGCGCTCCAAGG  
GCGTCTGGCTTGACCCGCGTTTTGT

TTCCTGTCTTACTTTCTGTTTCTCGCGGCCCGCGCTCTCTCCTTCGGCGCCCTCTAGCGGCCAGGA  
GAGACCGGCAAACA

**>HIV\_U1\_CHRX 9656 bp**

TGGAAGGGCTAATTTGGTCCCAAAGAAGACAAGATATCCTTGATCTGTGGATCTACCACACACAAG  
GCTACTTCCCTGATTGGCAGAACT

ACACACCAGGGCCAGGGATCAGATATCCACTGACCTTTGGATGGTGCTTCAAGTTAGTACCAGTTG  
AGCCAGGGCAGGTAGAAGAGGCCA

ATGAAGGAGAGAACAACACCTTGTTACACCCTATGAGCCTGCATGGGATGGAGGACCCGGAGGGA  
GAAGTATTAGTGTGGAAGTTTGACA

GCCTCCTAGCATTTTCGTACATGGCCCGAGAGCTGCATCCGGAGTACTACAAAGACTGCTGACATC  
GAGTTTTCTACAAGGGACTTTCCG

CTGGGGACTTTCCAGGGAGGTGTGGCCTGGGCGGGACTGGGGAGTGGCGAGCCCTCAGATGCTG  
CATATAAGCAGCTGCTTTTTGCCTGT

ACTGGGTCTCTCTGGTTAGACCAGATCTGAGCCTGGGAGCTCTCTGGCTAGCTAGGGAACCCACT  
GCTTAAGCCTCAATAAAGCTTGCCT

TGAGTGCTACAAGTAGTGTGTGCCCGTCTGTTGTGTGACTCTGGTAACTAGAGATCCCTCAGACCC  
TTTTAGTCAGTGTGGAAAATCTCT

AGCAGTGGCGCCCGAACAGGGACTTGAAAGCGAAAGTAAAGCCAGAGGAGATCTCTCGACGCAG  
GACTCGGCTTGCTGAAGCGCGCACGG

CAAGAGGCGAGGGGCGGCGACTGGTGAGTACGCCAAAAATTTGACTAGCGGAGGCTAGAAGGA  
GAGAGATGGGTGCGAGAGCGTCCGTA

TTAAGCGGGGAGAATTAGATAAATGGGAAAAAATTCGGTTAAGGCCAGGGGGAAAGAAACAATAT  
AGACTAAACATATAGTATGGGCA

AGCAGGGAAGTAGAACGATTTCGAGTTAATCCTGGCCTTTAGAGACATCAGAAGGCTGTAGACAA  
ATACTGAGACAGCTACAACCATCC

CTTCAGACAGGATCAGAAGAACGTAGATCATTATTTAATACAGTAGCAGTCCTCTATTGTGTGCATC  
AAAGGATAGATGTAAAAGACACC

AAGGAAGCCTTAGATAAGATAGAGGAAGAGCAAAACAAAAGTAAGAAAAAGGCACAGCAAGCAGCA  
GCTGACACAGGAAACAGCAGCCAG

GTCAGCCAAAATTACCCTATAGTGCAGAACCTCCAGGGGCAAATGGTACATCAGGCCATATCACCT  
AGAACTTTAAATGCATGGGTAAAA

GTAGTAGAAGAGAAGGCTTTCAGCCCAGAAGTAATACCCATGTTTTTCAGCATTATCAGAAGGAGCC  
ACCCACAAGATTTAAATACCATG

CTAAACACAGTGGGGGGACATCAAGCAGCCATGCAAATGTTAAAAGAGACCATCAATGAGGAAGCT  
GCAGAATGGGATAGATTGCATCCA

GTGCATGCAGGGCCTATTGCACCAGGCCAGATGAGAGAACCAAGGGGAAGTGACATAGCAGGAAC  
TACTAGTACCCTTCAGGAACAAATA



GGATGGATGACACATAATCCACCTATCCCAGTAGGAGAAATCTATAAAAAGATGGATAATCCTGGGAT  
TAAATAAAATAGTAAGAATGTAT

AGCCCTACCAGCATTCTGGACATAAGACAAGGACCAAAGGAACCCTTTAGAGACTATGTAGACCGA  
TTCTATAAAACTCTAAGAGCCGAG

CAAGCTTCACAAGAGGTAAAAAATTGGATGACAGAAACCTTGTTGGTCCAAAATGCGAACCCAGATT  
GTAAGACTATTTTAAAAGCATTG

GGACCAGGAGCGACACTAGAAGAAATGATGACAGCATGTCAGGGAGTGGGGGGACCCGGCCATA  
AAGCAAGAGTTTTGGCTGAAGCAATG

AGCCAAGTAACAAATCCAGCTAACATAATGATACAGAAAGGCAATTTTAGGAACCAAAGAAAGACTG  
TTAAGTGTTTTCAATTGTGGCAA

GAAGGGCACATAGCCAAAAATTGCAGGGCCCCTAGGAAAAAGGGCTGTTGGAAATGTGGAAAGGA  
AGGACACCAAATGAAAGATTGTACT

GAGAGACAGGCTAATTTTTTAGGGAAGATCTGGCCTTCCCACAAGGGAAGGCCAGGGAATTTTCTT  
CAGAGCAGACCAGAGCCAACAGCC

CCACCAGAAGAGAGCTTCAGGTTTGGGGAAGAGACAACAACCTCCCTCTCAGAAGCAGGAGACGAT  
AGACAAGGAACTGTATCCTTTAGCT

TCCCTCAGATCACTCTTTGGCAGCGACCCCTCGTCACAATAAAGATAGGGGGGCAATTAAGGAAG  
CTCTATTAGATACAGGAGCAGATG

ATACAGTATTAGAAGAAATGAATTTGCCAGGAAGATGGAAACCAAATGATAGGGGGAATTGGAG  
GTTTTATCAAAGTAAGACAGTATG

ATCAGATACTCATAGAAATCTGCGGACATAAAGCTATAGGTACAGTATTAGTAGGACCTACACCTGT  
CAACATAATTGGAAGAAATCTGT

TGACTCAGATTGGCTGCACTTTAAATTTTCCCATTAGTCCTATTGAGACTGTACCAGTAAAATTAAG  
CCAGGAATGGATGGCCCAAAG

TTAAACAATGGCCATTGACAGAAGAAAAAATAAAGCATTAGTAGAAATTTGTACAGAAATGGAAAA  
GGAAGGAAAAATTTCAAAAATTG

GGCCTGAAAATCCATACAATACTCCAGTATTTGCCATAAAGAAAAAGACAGTACTAAATGGAGAAA  
ATTAGTAGATTTAGAGAACTTA

ATAAGAGAACTCAAGATTTCTGGGAAGTTCAATTAGGAATACCACATCCTGCAGGGTTAAACAGAA  
AAAATCAGTAACAGTACTGGATG

TGGGCGATGCATATTTTTTCAGTTCCCTTAGATAAAGACTTCAGGAAGTATACTGCATTTACCATACCT  
AGTATAACAATGAGACACCAG

GGATTAGATATCAGTACAATGTGCTTCCACAGGGATGGAAAGGATCACCAGCAATATTCCAGTGTA  
GCATGACAAAAATCTTAGAGCCTT

TTAGAAAACAAAATCCAGACATAGTCATCTATCAATACATGGATGATTTGTATGTAGGATCTGACTTA  
GAAATAGGGCAGCATAGAACA

AAATAGAGGAACTGAGACAACATCTGTTGAGGTGGGGATTTACCACACCAGACAAAAAACATCAGA  
AGAACCCTCCATTCTTTGGATGG

GTTATGAACTCCATCCTGATAAATGGACAGTACAGCCTATAGTGCTGCCAGAAAAGGACAGCTGGA  
CTGTCAATGACATACAGAAATTAG

TGGGAAAATTGAATTGGGCAAGTCAGATTTATGCAGGGATTAAGTAAGGCAATTATGTAACTTCT  
TAGGGGAACCAAAGCACTAACAG

AAGTAGTACCACTAACAGAAGAAGCAGAGCTAGAACTGGCAGAAAACAGGGAGATTCTAAAAGAAC  
CGGTACATGGAGTGTATTATGACC

CATCAAAGACTTAATAGCAGAAATACAGAAGCAGGGGCAAGGCCAATGGACATATCAAATTTATCA  
AGAGCCATTTAAAAATCTGAAAA

CAGGAAAGTATGCAAGAACGAAGGGTGCCACACTAATGATGTGAAACAATTAACAGAGGCAGTGC  
AAAAAATAGCCACAGAAAGCATAG

TAATATGGGGAAAGACTCCTAAATTTAAATTACCCATACAAAAGGAAACATGGGAAGCATGGTGGAC  
AGAGTATTGGCAAGCCACCTGGA

TTCCTGAGTGGGAGTTTGTCAATACCCCTCCCTTAGTGAAGTTATGGTACCAGTTAGAAAAAGAACC  
CATAGTAGGAGCAGAACTTTCT

ATGTAGATGGGGCAGCCAATAGGGAAACTAAATTAGGAAAAGCAGGATATGTAAGTACAGAGGAA  
GACAAAAAGTTGTCCCCCTAACGG

ACACAACAAATCAGAAGACTGAGTTACAAGCAATTCATCTAGCTTTGCAGGATTCAGGATTAGAAGT  
AACATAGTAACAGACTCACAAAT

ATGCATTGGGAATCATTCAAGCACAACCAGATAAGAGTGAATCAGAGTTAGTCAGTCAAATAATAGA  
GCAGTTAATAAAAAAGGAAAAAG

TCTACCTGGCATGGGTACCAGCACACAAAGGAATTGGAGGAAATGAACAAGTAGATAAATTGGTCA  
GTGCTGGAATCAGGAAAGTACTAT

TTTTAGATGGAATAGATAAGGCCCAAGAAGAACATGAGAAATATCACAGTAATTGGAGAGCAATGG  
CTAGTGATTTAACCTGCCACCTG

TAGTAGCAAAGAAATAGTAGCCAGCTGTGATAAATGTCAGCTAAAAGGAGAAGCCATGCATGGAC  
AAGTAGACTGTAGCCCCGGAATAT

GGCAGCTAGATTGTACACATTTAGAAGGAAAAGTTATCTTGGTAGCAGTTCATGTGGCCAGTGGAT  
ATATAGAAGCAGAAGTAATTCCAG

CAGAGACAGGGCAAGAAACAGCATACTTCTCTTAAAATTAGCAGGAAGATGGCCAGTAAAAACAG  
TACATACAGACAATGGCAGCAATT

TCACCAGTACTACAGTTAAAGCCGCCTGTTGGTGGGCGGGGATCAAGCAGGAATTTGGCATTCCCT  
ACAATCCCCAAAGTCAAGGAGTAA

TAGAATCTATGAATAAAGAATTAAGAAAATTATAGGACAGGTAAGAGATCAGGCTGAACATCTTAA  
GACAGCAGTACAAATGGCAGTAT

TCATCCACAATTTTAAAAGAAAAGGGGGGATTGGGGGTACAGTGCAGGGGAAAGAATAGTAGACA  
TAATAGCAACAGACATACAACTA

AAGAATTACAAAAACAAATTACAAAAATTCAAATTTTCGGGTTTATTACAGAGACAGCAGAGATCCA  
GTTTGGAAAGGACCAGCAAAGC

TCCTCTGGAAAGGTGAAGGGGCAGTAGTAATACAAGATAATAGTGACATAAAAGTAGTGCCAAGAA  
GAAAAGCAAAGATCATCAGGGATT

ATGGAAAACAGATGGCAGGTGATGATTGTGTGGCAAGTAGACAGGATGAGGATTAACACATGGAAA  
AGATTAGTAAAACACCATATGTAT

ATTTCAAGGAAAGCTAAGGACTGGTTTTATAGACATCACTATGAAAGTACTAATCCAAAAATAAGTTC  
AGAAGTACACATCCCCTAGGG

GATGCTAAATTAGTAATAACAACATATTGGGGTCTGCATACAGGAGAAAGAGACTGGCATTGGGT  
CAGGGAGTCTCCATAGAATGGAGG

AAAAAGAGATATAGCACACAAGTAGACCCTGACCTAGCAGACCAACTAATTCATCTGCACTATTTTG  
ATTGTTTTTCAGAATCTGCTATA

AGAAATACCATATTAGGACGTTTAGTTAGTCCTAGGTGTGAATATCAAGCAGGACATAACAAGGTAG  
GATCTCTACAGTACTTGGCACTA

GCAGCATTAAATAAAACCAAACAGATAAGGCCACCTTTGCCTAGTGTTAGGAACTGACAGAGGAC  
AGATGGAACAAGCCCCAGAAGACC

AAGGGCCACAGAGGGAGCCATACAATGAATGGACTAGAGCTTTTAGAGGAACTTAAGAGTGAAG  
CTGTTAGACATTTTCCTAGGATAT

GGCTCCATAACTTAGGACAACATATCTATGAACTTATGGGGATACTTGGGCAGGAGTGAAGCCA  
TAATAAGAATTCTGCAACAACCTGC

TGTTTATTCATTTTCAGTATTGGATGTCAACATAGCAGAATAGGCATTATTCGACAGAGGAGAGCAAG  
GAATGGAGCCAGTAGATCCTAGA

CTAGAGCCCTGGAAGCTTCCAGGAAGTCAGCCTAAAACCTGCTTGTACCAATTGCTATTGTAAAAAGT  
GTTGCTTTTCATTGCCAAGTTTGT

TTCACAACAAAAGCCTTAGGCATCTCCTATGGCAGGAAGAAGCGGAGACAGCGACGAAGAGCTCC  
TCAAGACAGTGAGACTCATCAAGTT

TCTCTATCAAAGCAGTGAGTAGTACATGTAATGCTTTCTTTCAATAGTTGTGTGGACCATAGTGTTCA  
TAGAATACAGGAAAGTATTAAG

ACAAAGAAAAGTAGACAGGATAAATTGATAGAATAAGAGAAAGAGCAGAAGACAGTGGCAATGAGAG  
CGAAGGGGACCAGGAAGAATTATT

AGCACTTGTGGAGATGGGGCACGATGCTCCTTGGGATGTTAATGATCTGTAGTGCTGCAGAACAAT  
TGTGGGTCACAGTCTATTATGGGG

TACCTGTGTGGAAAGAAGCAACCACCTCTATTTTGTGCCTCGGATGCTAAAGCATATGACACAG  
AGGTACATAATGTTTGGGCCACAC

ATGCCTGTGTACCCACAGACCCTAACCCACAAGAAGTAGTATTGCAAATGTGACAGAAAATTTTAA  
CATGTGGAAAATAACATGGTAG

AACAAATGCATGAGGATATAATCAGTTTATGGGATCAAAGCCTAAAACCATGTGTAAAATTAACCCC  
ACTCTGTGTTACCTTAAATTGCA

CTGATTTGACGAATGCTACTTATGCCAATGGTAGTAGTGAGGAGAGAGGAGAAATAAGAAATTGCT  
CTTTCAATGTCACCACAATCATAA

GAAATAAGATACAAAAGAATATGCACTTTTTTATAGACTTGATATAGAACCAATAGATAAGGATAAT  
ACAAGCTATACATTGATAAATT

GTAACACCTCAGTCATTACACAGGCTTGTCCAAAGGTATCCTTTGAACCAATTCCCATACATTATTGT  
GCCCCGGCTGGTTTTGCGATTG

TAAAGTGTAACGATAAGAAATTCATGGAACAGGACCATGTACAAATGTCAGTACAGTACAATGTAC  
ACATGGAATTAGGCCAGTAGTGT

CAACTCATCTGCTATTAATGGCAGTCTAGCAGAAGGAGAGGTAGTAATTAGGTCTGAAAATTTAC  
GAACAATGTAAAACATAATAG

TACAGCTGAATGAATCTGTAGAAATTAATTGTACAAGACCCAACAACAATACAAGAAAAGGTATAGC  
TATAGGACCGGGGAGAACAATCT

ATGCAAGAGAAAAATAATAGGAGATATAAGACAAGCACATTGTAACCTTAGTAGAGCAAAATGGAA  
TGACACTTTAAAACAGATAGTTA

CAAAATTAAGAACAATTTAGGAATAAAACAATAGTCTTTAATCAATCCTCAGGAGGGGACCCAGA  
AATTGTAATGCACAGTTTTAATT

GTGGAGGGGAATTTTTCTACTGTAAGACAACACAGCTGTTAATAGTACTTGGCTGTTAATAGTAC  
TTGGAATGATACTGAAAGGTCAG

ATAACAATGAACTATCATACTCCCATGCAGAATAAAACAATTATAAACAGGTGGCAGGAAGTAGG  
AAAAGCAATATATGCCCTCCCA

TCAGTGGACAAATTAGATGCTCATCAAATATTACAGGGCTGCTATTAACAAGAGATGGTGGTGATAA  
AGAGAACAGTACCACCGAGATCT

TCAGACCTGGAGGAGGAGATATGAGGGACAATTGGAGAAGTGAATTATATAAATATAAAGTAGTAAA  
AATTGAGCCATTAGGAGTAGCAC

CCACCAAGGCAAAGAGAAGAGTGGTGCAGAGAGAAAAAGAGCAGTGGGAGCGCTAGGAGCTCT  
GTTTCTTGGGTTCTTGGGAGCAGCAG

GAAGCACTATGGGCGCAGCGTCAATGGCGCTGACGGTACAGACCAGACAATTAATGTCTGGTATA  
GTGCAACAGCAAAACAATTTGCTGA

AGGCTATTGAGGCGCAACAGCATCTGTTGCAACTCACAGTCTGGGGCATCAAGCAGCTCCAGGCA  
AGAGTCTGGCTGTGGAAAGATACC

TAAAGGATCAACAGCTCCTAGGGATGTGGGGTTGCTCTGGAAAACCTCATCTGCACCACTACTGTGC  
CTTGAATGCTAGTTGGAGTAATA

AATCTCTGGATAAGATTTGGGATAACATGACCTGGATGGAGTGGGAGAGAGAAATTGACAATTACA  
CAGGCTTAATATACACCTTAATTG

AAGAATCGCAGTACCAACAAGAAAAGAATGAACAAGAATTATTGGAATTGGATAAGTGGGCAAGTTT  
GTGGAATTGGTTTGACATAACAA

AGTGGCTGTGGTATATAAAAATATTCATAATGATAGTAGGAGGTTTAATAGGTTTAAGAATAGTTTTT  
ACTGTACTTTCTATAGTGAATA

GAGTTAGGCAGGGATACTCACCATTATCGTTCCAGACCCGCCTCCCAACCCAGAGGGGACCCGAC  
AGGCCGAAGGAATCGAAGAAGAAG

GTGGAGAGAGAGACAGAGACAGATCCGGACCATTAGTGAATGGATTCTTAGCACTCATCTGGGTC  
GATCTGCGGAGCCTGTGCCTCTTCA

GCTACCACCGCTTGAGAGACTTACTCTTGATTGTAACGAGGATTGTGGAACCTTCTGGGACGCAGGG  
GGTGGGAAGTCTCAAATATTGTT

GGAATCTCCTGCAGTATTGGGGTCAGGAACTAAAGAATAGTGCTATTAGTTTGCTTAATGCCACAGC  
TGTAGCAGTAGCTGAGGGGACAG

ATAGGGTTATAGAAGTAGCACAAAGAATTGGTAGGGGTATCCTCCATATCCCTAGAAGAATAAGACA  
AGGCTTAGAAATTGCTTTGCTAT

AAGATGGGTGGCAAGTGGTCAAACGTAGTATGGCTGGATGGTCTGCTGTAAGAGAAAGAATGAAA  
CGAGCTGAACCAGCAGCAGATGGG

GTGGGAGCAGTATCTCGAGACTTGAAAAACATGGAGCAATCACAAGTAGCAATACAGCAGCTACT  
AATGCTGATTGTGCCTGGCTAGAA

GCACAAGAGGATGAGGAGGTGGGTTTTCCAGTCAGACCTCAGGTACCTTTAAGACCAATAACTCGC  
AGGGCAGCTATGGATCTTAGCCAC

TTTTTAAAAGAAGAGGGGGGACTGGAAGGGCTAATTTGGTCCCAAAGAAGACAAGATATCCTTGAT  
CTGTGGATCTACCACACACAAGGC

TACTTCCCTGATTGGCAGAACTACACACCAGGGCCAGGGATCAGATATCCACTGACCTTTGGATGG  
TGCTTCAAGTTAGTACCAGTTGAG

CCAGGGCAGGTAGAAGAGGCCAATGAAGGAGAGAACAACACCTTGTTACACCCTATGAGCCTGCA  
TGGGATGGAGGACCCGGAGGGAGAA

GTATTAGTGTGGAAGTTTGACAGCCTCCTAGCATTTCGTCACATGGCCCGAGAGCTGCATCCGGAG  
TACTACAAAGACTGCTGACATCGA

GTTTTCTACAAGGGACTTTCCGCTGGGGACTTTCCAGGGAGGTGTGGCCTGGGCGGGACTGGGGA  
GTGGCGAGCCCTCAGATGCTGCATA

TAAGCAGCTGCTTTTTGCCTGTACTGGGTCTCTCTGGTTAGACCAGATCTGAGCCTGGGAGCTCTC  
TGCTAGCTAGGGAACCCACTGCT

TAAGCCTCAATAAAGCTTGCCTTGAGTGCTACAAGTAGTGTGTGCCCGTCTGTTGTGTGACTCTGG  
TAACTAGAGATCCCTCAGACCCTT

TTAGTCAGTGTGGAAAATCTCTAGCA

**>HIV\_U1\_CHR2 9656 bp**

TGGAAGGGCTAATTTGGTCCCAAAGAAGACAAGATATCCTTGATCTGTGGATCTACCACACACAAG  
GCTACTTCCCTGATTGGCAGAACT

ACACACCAGGGCCAGGGATCAGATATCCACTGACCTTTGGATGGTGCTTCAAGTTAGTACCAGTTG  
AGCCAGGGCAGGTAGAAGAGGCCA

ATGAAGGAGAGAACAACACCTTGTTACACCCTATGAGCCTGCATGGGATGGAGGACCCGGAGGGA  
GAAGTATTAGTGTGGAAGTTTGACA

GCCTCCTAGCATTTCGTCACATGGCCCGAGAGCTGCATCCGGAGTACTACAAAGACTGCTGACATC  
GAGTTTTCTACAAGGGACTTTCCG

CTGGGGACTTTCCAGGGAGGTGTGGCCTGGGCGGGACTGGGGAGTGGCGAGCCCTCAGATGCTG  
CATATAAGCAGCTGCTTTTTGCCTGT

ACTGGGTCTCTCTGGTTAGACCAGATCTGAGCCTGGGAGCTCTCTGGCTAGCTAGGGAACCCACT  
GCTTAAGCCTCAATAAAGCTTGCCT

TGAGTGCTACAAGTAGTGTGTGCCCGTCTGTTGTGTGACTCTGGTAACTAGAGATCCCTCAGACCC  
TTTTAGTCAGTGTGGAAAATCTCT

AGCAGTGGCGCCCGAACAGGGACCTGAAAGCGAAAGTAAAGCCAGAGGAGATCTCTCGACGCAG  
GACTCGGCTTGCTGAAGCGCGCACGG

CAAGAGGCGAGGGGCGGCGACTGGTGTAGTACGCCAAAATTTTACTAGCGGAGGCTAGAAGGA  
GAGAGATGGGTGCGAGAGCGTCCGTA

TTAAGCGGGGAGAATTAGATAAATGGGAAAAATTCGGTTAAGGCCAGGGGGAAAGAAACAATAT  
AGACTAAACATATAGTATGGGCA

AGCAGGGAAGTAGAACGATTCGCAGTTAATCCTGGCCTTTTAGAGACATCAGAAGGCTGTAGACAA  
ATACTGAGACAGCTACAACCATCC

CTTCAGACAGGATCAGAAGAACGTAGATCATTATTTAATACAGTAGCAGTCCTCTATTGTGTGCATC  
AAAGGATAGATGTAAAAGACACC

AAGGAAGCCTTAGATAAGATAGAGGAAGAGCAAACAAAAGTAAGAAAAGGCACAGCAAGCAGCA  
GCTGACACAGGAAACAGCAGCCAG

GTCAGCCAAAATTACCCTATAGTGCAGAACCTCCAGGGGCAAATGGTACATCAGGCCATATCACCT  
AGAACCTTTAAATGCATGGGTAAAA

GTAGTAGAAGAGAAGACTTTTCAGCCAGAAGTAATACCCATGTTTTTCAGCATTATCAGAAGGAGCC  
ACCCACAAGATTTAAATACCATG

CTAAACACAGTGGGGGACATCAAGCAGCCATGCAAATGTTAAAGGAGACCATCAATGAGGAAGCT  
GCAGAATGGGATAGATTGCATCCA

GTGCATGCAGGGCCTATTGCACCAGGCCAGATGAGAGAACCAAGGGGAAGTGACATAGCAGGAAT  
TACTAGTACCCTTCAGGAACAAATA

GGATGGATGACACATAATCCACCTATCCCAGTAGGAGAAATCTATAAAAGATGGATAATCCTGGGA  
CTAAATAAAATAGTAAGAATGTAT

AGCCCTACCAGCATTCTGGACATAAGACAAGGACCAAAGGAACCCTTTAGAGACTATGTAGACCGG  
TTCTATAAAACTCTAAGAGCCGAG

CAAGCTTCACAGGAGGTAAAAAATTGGATGACAGAAACCTTGTTGGTCCAAAATGCGAACCCAGAT  
TGTAAGACTATTTTAAAAGCATTG

GGACCAGCAGCTACACTAGAAGAAATGATGACAGCATGTCAGGGAGTGGGGGGACCCGGCCATAA  
AGCAAGAGTTTTGGCTGAAGCAATG

AGCCAAGTAACAAATCCAGCTACCATAATGATACAGAAAGGCAATTTTAGGAACCAAAGAAAGACTA  
TTAAGTGTTTTAATTGTGGCAA

GAAGGGCACATAGCCAAAATTGCAGGGCCCCTAGGAAAAGGGCTGTTGGAAATGTGGAAAAGA  
AGGACACCAAATGAAAGATTGTACT

GAGAGACAGGCTAATTTTTTAGGGAAAATCTGGCCTTCCCACAAGGGAAGGCCAGGGAATTTTCTT  
CAGAGCAGACCAGAGCCAACAGCC

CCACCAGAAGAGAGCTTCAGGTTTGGGGAAGAGACAACAACCTCCCTCTCAGAAGCAGGAGACGAT  
AGACAAGGAAGTGTATCCTTTAGCT

TCCCTCAGATCACTCTTTGGCAGCGACCCCTCGTCACAATAAAGATAGGGGGGCAACTAAAGGAAG  
CTCTATTAGATACAGGAGCAGATG

ATACAGTATTAGAAGAAATGAATTTGCCAGGAAGATGGAAACCAAATGATAGGGGGAATTGGAG  
GTTTTATCAAAGTAAGACAGTATG

ATCAGATACCCATAGAAATCTGCGGACATAAAGCTATAGGTACAGTATTAGTAGGACCTACACCTGT  
CAACATAATTGGAAGAAATCTGT

TGACTCAGATTGGCTGCACTTTAAATTTTCCCATTAGTCCTATTGAAACTGTACCAGTAAAATTAAG  
CCAGGAATGGATGGCCAAAAG

TTAAACAATGGCCATTGACAGAAGAAAAATAAAAGCATTAGTAGAAATTTGTACAGAAATGGAAAA  
GGAAGGAAAAATTTCAAAAATTG

GGCCTGAAAATCCATACAATACTCCAGTATTTGCCATAAAGAAAAAGACAGTACTAAATGGAGAAA  
ATTAGTAGATTTTCAGAGAACTTA

ATAAGAGAACTCAAGATTTCTGGGAAGTTCAATTAGGAATACCACATCCTGCAGGATTA AACAGAA  
AAAATCAGTAACAGTACTGGATG

TGGGTGATGCATATTTTTTCAGTTCCCTTAGATAAAGACTTCAGGAAGTATACTGCATTTACCATACCT  
AGTATAACAATGAGACACCAG

GGATTAGATATCAGTACAATGTGCTTCCACAGGGATGGAAAGGATCACCAGCAATATTCCAGTGTA  
GCATGACAAAAATCTTGGAGCCTT

TTAGAAAACAAAATCCAGACATAGTCATCTATCAATACATGGATGATTTGTATGTAGGATCTGACTTA  
GAAATAGGGCAGCATAGAACAA

AAATAGAGGAACTGAGACAACATCTGTTGAGGTGGGGATTTACCACACCAGACAAAAAACATCAGA  
AGAACCTCCATTCTTTGGATGG

GTTATGAACTCCATCCTGATAAATGGACAGTACAGCCTATAGTGCTGCCAGAAAAGGACAGCTGGA  
CTGTCAATGACATACAGAAATTAG

TGGGAAAATTGAATTGGGCAAGTCAGATTTATGCAGGGATTAAGTAAGGCAATTATGTAACTTCT  
TAGGGGAACCAAGCACTAACAG

AAGTAGTACCACTAACAGAAGAAGCAGAGCTAGA ACTGGCAGAAAACAGGGAGATTCTAAAAGAAC  
CGGTACATGGAGTGTATTATGACC

CATCAAAGACTTAATAGCAGAAATACAGAAGCAGGGGCAAGGCCAATGGACATATCAAATTTATCA  
AGAGCCATTTAAAAATCTGAAAA

CAGGAAAGTATGCAAGAATGAAGGGTGCCACACTAATGATGTGAAACAATTAACAGAGGCAGTAC  
AAAAATAGCCACAGAAAGCATAG

TAATATGGGGAAAGACTCCTAAATTTAAATTACCCATACAAAAGGAAACATGGGAAGCGTGGTGG  
CGGAGTATTGGCAAGCCACCTGGA

TTCCTGAATGGGAGTTTGTCAATACCCCTCCCTTAGTGAAGTTATGGTACCAGTTAGAAAAAGAACC  
CATAGTAGGAGCAGAACTTTCT

ATGTAGATGGGGCAGCCAATAGGGAAACTAAATTAGGAAAAGCAGGATATGTA ACTGACAGAGGAA  
GACAAAAAGTTGTCCCCCTAACGG

ACACAACAAATCAGAAGACTGAGTTACAAGCAATTCATCTAGCTTTGCAGGATTCAGGATTAGAAGT  
AACATAGTAACAGACTACAAT

ATGCATTGGGAATCATTCAAGCACAACCAGATAAGAGTGAATCAGAGTTAGTCAGTCAAATAATAGA  
GCAGTTAATAAAAAAGGAAAAAG

TCTACCTGGCATGGGTACCAGCACACAAAGGAATTGGAGGAAATGAACAAGTAGATAAATTGGTCA  
GTGCTGGAATCAGGAAAGTACTAT

TTTTAGATGGAATAGATAAGGCCCAAGAAGAACATGAGAAATATCACAGTAATTGGAGAGCAATGG  
CTAGTGATTTAACCTGCCACCTG

TAGTAGCAAAGAAATAGTAGCCAGCTGTGATAAATGTCAGCTAAAAGGAGAAGCCATGCATGGAC  
AAGTAGACTGTAGCCCCGGAATAT

GGCAGCTAGATTGTACACATTTAGAAGGAAAAGTTATCTTGGTAGCAGTTCATGTAGCCAGTGGATA  
TATAGAAGCAGAAGTAATTCCAG

CAGAGACAGGGCAAGAAACAGCATACTTCCTCTTAAAATTAGCAGGAAGATGGCCAGTAAAAACAG  
TACATACAGACAATGGCAGCAATT

TCACCAGTACTACAGTTAAAGCCGCCTGTTGGTGGGCGGGGATCAAGCAGGAATTTGGCATTCCCT  
ACAATCCCCAAAAGTCAAGGAGTAA

TAGAATCTATGAATAAAGAATTAAGAAAATTATAGGACAGGTAAGAGATCAGGCTGAACATCTTAA  
GACAGCAGTACAAATGGCAGTAT

TCATCCACAATTTTAAAAGAAAAGGGGGGATTGGGGGGTACAGTGCAGGGGAAAGAATAGTAGACA  
TAATAGCAACAGACATACAACTA

AAGAATTACAAAACAAATTACAAAATTCAAATTTTCGGGTTTATTACAGGGACAGCAGAGATCCA  
GTTTGGAAAGGACCAGCAAAGC

TCCTCTGGAAAGGTGAAGGGGCAGTAGTAATACAAGATAATAGTGACATAAAAAGTAGTGCCAAGAA  
GAAAAGCAAAGATCATCAGGGATT

ATGGA AACAGATGGCAGGTGATGATTGTGTGGCAAGTAGACAGGATGAGGATTAACACATGGAAA  
AGATTAGTAAAACACCATATGTAT

ATTTCAAGGAAAGCTAAGGACTGGTTTTATAGACATCACTATGAAAGTACTAATCCAAAATAAGTTC  
AGAAGTACACATCCCCTAGGG

GATGCTAAATTAGTAATAACAACATATTGGGGTCTGCATACAGGAGAAAGAGACTGGCATTGGGT  
CAGGGAGTCTCCATAGAATGGAGG

AAAAAGAGATATAGCACACAAGTAGACCCTGACCTAGCAGACCAACTAATTCATCTGCACTATTTTG  
ATTGTTTTTCAGAATCTGCTATA

AGAAATACCATATTAGGACGTTTAGTTAGTCCTAGGTGTGAATATCAAGCAGGACATAACAAGGTAG  
GATCTCTACAGTACTTGGCACTA

GCAGCATTAAATAAAACCAAACAGATAAGGCCACCTTTGCCTAGTGTTAGGAAACTGACAGAGGAC  
AGATGGAACAAGCCCCAGAAGACC

AAGGGCCACAGAGGGAGCCATACAATGAATGGACACTAGAGCTTTTAGAGGAACTTAAGAGTGAAG  
CTGTTAGACATTTTCCTAGGATAT

GGCTCCATAACTTAGGACAACATATCTATGAACTTATGGGGATACTTGGGCAGGAGTGGAAGCCA  
TAATAAGAATTCTGCAACAACCTGC

TGTTTATTCATTTTCAGAATTGGATGTCAACATAGCAGAATAGGCATTATTCGACAGAGGAGAGCAAG  
GAACGGAGCCAGTAGATCCTAGA

CTAGAGCCCTGGAAGCATCCAGGAAGTCAGCCTAAAAGTCTTGTACCAATTGCTATTGTAAAAAGT  
GTTGCTTTTCATTGCCAAGTTTGT

TTCACAACAAAAGCCTTAGGCATCTCCTATGGCAGGAAGAAGCGGAGACAGCGACGAAGAGCTCC  
TCAAGACAGTGAGACTCATCAAGTT

TCTCTATCAAAGCAGTGAGTAGTACATGTAATGCTTTCTTTCAATAGTTGTGTGGACCATAGTGTTCA  
TAGAATACAGGAAAGTATTAAG



ACAAAGAAAAGTAGACAGGATAATTGATAGAATAAGAGAAAAGAGCAGAAGACAGTGGCAATGAGAG  
CGAAGGGGACCAGGAAGAATTATC

AGCACTTGTGGAGATGGGGCACGATGCTCCTTGGGATGTTAATGATCTGTAGTGCTGCAGAACAAT  
TGTGGGTCACAGTCTATTATGGGG

TACCTGTGTGGAAAGAAGCAACCACCACTCTATTTTGTGCCTCGGATGCTAAAGCATATGACACAG  
AGGTACATAATGTTTGGGCCACAC

ATGCCTGTGTACCCACAGACCCTAACCCACAAGAAGTAGTATTGCAAATGTGACAGAAAATTTTAA  
CATGTGGAAAAATAACATGGTAG

AACAAATGCATGAGGATATAATCAGTTTATGGGATCAAAGCCTAAAACCATGTGTAAAATTAACCCC  
ACTCTGTGTTACCTTAAATTGCA

CTGATTTGACGAATGCTACTTATGCCAATGGTAGTAGTGAGGAGAGAGGAGAAATAAGAAATTGCT  
CTTTCAATGTCACCACAATCATAA

GAAATAAGATACAAAAAGAATATGCACTTTTTTATAGACTTGATATAGAACCAATAGATAAGGATAAT  
ACAAGCTATACATTGATAAATT

GTAACACCTCAGTCATTACACAGGCTTGTCCAAAGGTATCCTTTGAACCAATTCCCATACATTATTGT  
GCCCCGGCTGGTTTTGCGATT

TAAAGTGAACGATAAGAAATTC AATGGAACAGGACCATGTACAAATGTCAGTACAGTACAATGTAC  
ACATGGAATTAGGCCAGTAGTGT

CAACTCATCTGCTATTAATGGCAGTCTAGCAGAAGGAGAGGTAGTAATTAGGTCTGAAAATTTTAC  
GAACAATGTTAAAACCATAAATAG

TACAGCTGAATGAATCTGTAGAAATTAATTGTACAAGACCCAACAACAATACAAGAAAAGGTATAGC  
TATAGGACCGGGGAGAACACTCT

ATGCAAGAGAAAAATAATAGGAGATATAAGACAAGCACATTGTAACCTTAGTAGAGCAAAATGGAA  
TGACACTTTAAAACAGATAGTTA

CAAAATTAAGAACAATTTAGGAATAAAACAATAGTCTTTAATCAATCCTCAGGAGGGGACCCAGA  
AATTGTAATGCACAGTTTTAATT

GTGGAGGGGAATTTTTCTACTGTAAGACAACACAGCTGTTTAATAGTACTTGGCTGTTTAATAGTAC  
TTGGAATGATACTGAAAGGTCAG

ATAACAATGAACTATCATACTCCCATGCAGAATAAAACAATTATAAACAGGTGGCAGGAAGTAGG  
AAAAGCAATATATGCCCTCCCA

TCAGTGGACAAATTAGATGCTCATCAAATATTACAGGGCTGCTATTAACAAGAGATGGTGGTGATAA  
AGAGAACAGTACCACCGAGATCT

TCAGACCTGGAGGAGGAGATATGAGGGACAATTGGAGAAGTGAATTATATAAATATAAAGTAGTAAA  
AATTGAGCCATTAGGAGTAGCAC

CCACCAAGGCAAAGAGAAGAGTGGTGCAGAGAAAAAAGAGCAGTGGGAGCGCTAGGAGCTCTG  
TTCCTTGGGTTCTTGGGAGCAGCAG

GAAGCACTATGGGCGCAGCGTCAATGGCGCTGACGGTACAGACCAGACAATTAATGTCTGGTATA  
GTGCAACAGCAGAACAATTTGCTGA

AGGCTATTGAGGCGCAACAGCATCTGTTGCAACTCACAGTCTGGGGCATCAAGCAGCTCCAGGCA  
AGAGTCTGGCTGTGGAAAGATACC

TAAAGGATCAACAGCTCCTAGGGATTTGGGGTTGCTCTGGAAAACCTCATCTGCACCACTACTGTGC  
CTTGAATGCTAGTTGGAGTAATA

AATCTCTGGATAAGATTTGGGATAACATGACCTGGATGGAGTGGGAGAGAGAAATTGACAATTACA  
CAGGCTTAATATACACCTTAATTG

AAGAATCGCAGATCCAACAAGAAAAGAATGAACAAGAATTATTGGAATTGGATAAGTGGGCAAGTTT  
GTGGAATTGTTTTGACATAACAA

AGTGGCTGTGGTATATAAAAATATTCATAATGATAGTAGGAGGTTTAATAGGTTTAAGAATAGTTTTT  
ACTGTACTGTCTATAGTGAATA

GAGTTAGGCAGGGATACTCACCATTATCGTTCCAGACCCGCCTCCCAGCCCAGAGGGGACCCGAC  
AGGCCGAAGGAATCGAAGAAGAAG

GTGGAGAGAGAGACAGAGACAGATCCGGACCATTAGTGAATGGATTCTTAGCACTCATCTGGGTC  
GATCTGCGGAGCCTGTGCCTCTTCA

GCTACCACCGCTTGAGAGACTTACTCTTGATTGTAACGAGGATTGTGGAACCTCTGGGACGCAGGG  
GGTGGGAAGCCCTCAAATATTGTT

GGAATCTCCTGCAGTATTGGGGTCAGGAACTAAAGAATAGTGCTATTAGTTTGCTTAATGCCACAGC  
TGAGCAGTAGCTGAGGGGACAG

ATAGGGTTATAGAAGTAGCACAAAGAATTGGTAGGGGTATCCTCCATATCCCTAGAAGAATAAGACA  
AGGCTTAGAAATTGCTTTGCTAT

AAGATGGGTGGCAAGTGGTCAAACGTAGTATGGCTGGATGGTCTGCTGTAAGAGAAAGAATGAAA  
CGAGCTGAACCAGCAGCAGATGGG

GTGGGAGCAGTATCTCGAGACTTGGA AAAACATGGAGCAATCACAAGTAGCAATACAGCAGCTACT  
AATGCTAATTGTGCCTGGCTAGAA

GCACACGAGGAGGAGGAGGTGGGTTTTCCAGTCAGACCTCAGGTACCTTTAAGACCAATAACTCG  
CAAGGCAGCTATGGATCTTAGCCAC

TTTTTAAAAGAAGAGGGGGACTGGAAGGGCTAATTTGGTCCCAAAGAAGACAAGATATCCTTGAT  
CTGTGGATCTACCACACACAAGGC

TACTTCCCTGATTGGCAGAACTACACACCAGGGCCAGGGATCAGATATCCACTGACCTTTGGATGG  
TGCTTCAAGTTAGTACCAGTTGAG

CCAGGGCAGGTAGAAGAGGCCAATGAAGGAGAGAACAACACCTTGTTACACCCTATGAGCCTGCA  
TGGGATGGAGGACCCGGAGGGAGAA

GTATTAGTGTGGAAGTTTGACAGCCTCCTAGCATTTTCGTACATGGCCCGAGAGCTGCATCCGGAG  
TACTACAAAGACTGCTGACATCGA

GTTTTCTACAAGGGACTTTCCGCTGGGGACTTTCCAGGGAGGTGTGGCCTGGGCGGGACTGGGGA  
GTGGCGAGCCCTCAGATGCTGCATA

TAAGCAGCTGCTTTTTGCCTGTACTGGGTCTCTCTGGTTAGACCAGATCTGAGCCTGGGAGCTCTC  
TGGCTAGCTAGGGAACCACTGCT

TAAGCCTCAATAAAGCTTGCCTTGAGTGCTACAAGTAGTGTGTGCCCGTCTGTTGTGTGACTCTGG  
TAACTAGAGATCCCTCAGACCCTT

TTAGTCAGTGTGGAAAATCTCTAGCA

**>02006\_consensus (9737 bp) Consensus sequence of the proviruses from patient 02006**

TGGAAGGGATGATTTACTCCCAGAAAAGACAAGAAATCCTTGACCTGTGGGTCTACCACACACAAG  
GCTACTTCCCTGATTGGCAGAACT

ACACACCAGGGCCAGGGATCAGATATCCACTGACCTTTGGGTGGTGCTTCAAGTTAGTACCAGTGG  
ATCCAGATAAGGTAGAAGAGGCCA

CTGAAGGAGAAAACAACCTGCTTGTTACACCCTATGAACCAGCACGGGATGGATGATCCGGAGAAG  
GAAGTGTTACAGTGGAAGTTTGACA

GTCGCCTAGCATTTCCACCATGTGGCCCGAGAGATACATCCGGAGTACTACAAGAACTGATGACACT  
GAGCTTTCTACAAGGACTTTTCCA

CTGGGGACTTTCCAGGGGAGGTGTGGCCGGGGCGGGACTGGGGAGTGGCGAGCCCTCAGATGC  
TGCATATAAGCAGCTGCTTTTTGCCTG

TACTGGGTCTCTCTGGTTAGACCAGATCTGAGCCTGGGAGCTCTCTGGCTGACTAGGGAACCCACT  
GCTTAAGCCTCAATAAAGCTTGCC

TTGAGTGCTTCAAGTAGTGTGTGCCCGTCTGTTGTGTGACTCTGGTAACTAGAGATCCCTCAGACC  
CATTTAGTCAGTGTGAAAATCTC

TAGCAGTGGCGCCCGAACAGGGACTTGAAAGCGAAAGTAAAGCCAGAGGAGATCTCTCGACGCAG  
GACTCGGCTTGCTGAAGCGCGCACA

GCAAGAGGCGAGGGGCGGCGACTGGTGAGTACGCCAAAAATTTTACTAGCGGAGGCTAGAAGG  
AGAGAGATGGGTGCGAGAGCGTCAAT

ATTAAGCGGGGGAAAATTAGATGCATGGGAAAAAATTCGGTTAAGGCCAGGAGGAAAGAAACAATA  
TAAGCTAAAACATCTAGTATGGGC

AAGCAGGGAGTTAGAACGATTTCGCGGTTAACCCCTGGCCTGTTAGAAACATCAGAAGGCTGTAAACA  
AATAATAGGACAGCTACAACCATC

CTTACAGACAGGATCAGAAGAACTTAAATCATTATTTAATACAGTAGCAGTACTCTATTGTGTACACC  
AAAGGATAGAGGTAAAAGACAC

CAAGGAAGCTCTAGATAAGATAGAGGAAGAGCAAATAAAAAGTAAGAAAAAGGAACAGCAAGCAGC  
AGCTGACGCAGGAAGCAGCAGCAA

GGTCAGCCAAAATTACCCTATAGTGCAGAACCTACAGGGACAAATGGTACATCAGCCTATATCACC  
TAGAACTTTAAATGCATGGGTAAA

AGTAGTAGAAGAGAAGGCTTTTCAGCCCAGAAGTAATACCCATGTTTACAGCATTATCAGAAGGAGC  
CACCCACAAGATTTAAACACCAT

GCTAAACACGGTGGGGGGACACCAAGCAGCCATGCAAATGTTAAAAGAGACCATCAATGAGGAAG  
CTGCAGAATGGGATAGATTGCATCC

AGTGCAGGCAGGGCCTGTTGCACCAGGCCAAATAAGAGAACCAAGGGGAAGTGACATAGCAGGAA  
CTACTAGTACCCTTCAGGAACAAAT

AGCATGGATGACACATAATCCACCTGTCCCAGTAGGAGAAATCTATAAAAGATGGATAATCCTGGG  
ATTAAATAAGATAGTAAGAATGTA

TAGCCCTACCAGCATTCTGGACATAAGACAAGGACCAAAGGAACCCCTTTAGAGACTATGTAGACCG  
GTTCTATAAGACTCTAAGAGCTGA

GCAAGCTTCACAGGATGTAAAAAATTGGATGACAGAAACCTTGTTGGTCCAAAATTCAAACCCAGAT  
TGTAAGACTATTTTTAAAAGCATT

GGGACCAGGAGCTACACTAGAAGAAATGATGACAGCATGTCAGGGAGTGGGGGGACCCGGCCAC  
AAAGCAAGAGTTTTGGCGGAAGCAAT

GAGCCAAGCAACAGGTGCAGCTACCATAATGATGCAGAAAGGCAATTTTAGGAACCAAAGAAAAGC  
TGTTAAGTGTTTCAATTGTGGCAA

AGAAGGGCACATAGCCAGAAATTGCAGGGCCCCTAGGAAAAAGGGCTGTTGAAATGTGGAAAGG  
AAGGACACCAAATGAAAGATTGTAT

TGAGAGACAGGCTAATTTTTTAGGGAAAATCTGGCCTTCCCACAAGGGAAGGCCAGGGAATTTTCT  
TCAGAGCAGACCAGAGCCAACAGC

CCCACCAGCCCCACCAGAAGAGAGCTTCAGGTTTGGGGAAGAGACAACAACCTCCCCATCAGAAGC  
CGGAGGCGATAGACAAGGAAGTGTA

TCCTTTGGCTTCCCTCAAATCACTCTTTGGCAGCGACCCCTCGTCACAATAAGGATAGGGGGGCAG  
CTAAAGGAAGCTCTATTAGATACA

GGAGCAGATGACACAGTATTAGAAGAAATGAATTTGCCAGGAAAATGGAAACCAAAAATGATAGGG  
GGAATTGGAGGTTTTATCAAAGTA

AGACAGTATGATCAGATACCCATAGAAATATGTGGACATAAAGCTATAGGTACAGTATTAGTAGGAC  
CTACACCTGTCAACATAATTGGA

AGAAATCTGTTGACTCAGCTTGGCTGTACTTTAAATTTTCCCATTAGTCCTATTGAACTGTACCAGT  
AAAATTAAGCCAGGAATGGAT

GGCCCAAAGTTAAACAATGGCCATTGACAGAAGAAAAATAAAAGCATTAGTAGAAATTTGTACAG  
AAATGGAAAAGGAAGGGAAAATT

TCAAAAATTGGCCTGAAAATCCATACAACACTCCAGTATTTGCCATAAAGAAAAAGATAGTACTA  
AATGGAGAAAATTAGTAGATTTT

AGAGAACTTAATAAGAGAACTCAAGACTTCTGGGAAGTTCAATTAGGAATACCACATCCTGCAGGGT  
TAAAAAGAAAAAATCAGTAACA

GTACTIONAGTGGGTGATGCATATTTTTCAGTTCCCTTAGATAAAGACTTCAGGAAGTATACTGCAT  
TTACCATACCTAGTACAAACAAT

GAGACACCAGGGATTAGATATCAGTACAATGTGCTTCCACAGGGATGGAAAGGATCACCAGCAATA  
TTCCAATGTAGCATGACAAAATT

TTAGAGCCTTTTAGAAAACAACATCCAGATATAGTTATCTATCAATACATGGATGATTTGTATGTAGG  
ATCTGACTTAGAAATAGGACAG

CATAGAACAAAAATAGAAGAACTGAGACAACACTTGTTGAAGTGGGGATTTACTACACCAGACAAAA  
AACATCAGAAAGAACCTCCATTC

CTTTGGATGGGTTATGAACTCCATCCTGATAAATGGACAGTACAGCCTATAGTGCTGCCAGAAAA  
GACAGCTGGACTGTCAATGACATA

CAGAAGTTAGTGGGAAAATTGAATTGGGCAAGTCAGATTTACCCAGGGATTAAAGTAAGGCAATTAT  
GTAACCTCCTTAGAGGAACCAAA

GCACTAACAGAAGTAATAACTCTAACAGCAGAAGCAGAGTTAGAAGTGGCAGAAAACAGGGAAATT  
CTAAAAGAACCAGTACATGGAGTG

TATTATGACCCATCAAAAGACTTAATAGCAGAAATACAGAAGCAGGAGCAAGGCCAATGGACATATC  
AAATTTATCAAGAACCATTTAAA

AACCTGAAAACAGGAAAATATGCAAGAGTGAGGGGTGCCACACTAATGATGTAAGACAATTAACA  
GAGGCAGTGCAAAAATAGCCACA

GAAAGCATAGTAATATGGGGAAAGACTCCTAAATTTAACTACCCATACAAAAGAAACATGGGAAG  
CATGGTGGACAGAGTATTGGCAA

GCCACCTGGATTCTGAATGGGAGTTTGTCAATACCCCTCCCCTAGTGAAGTTATGGTACCAGTTA  
GAAAAGAACCCATAGTAGGAGCA

GAAACTTTCTATGTAGATGGGGCAGCTAACAGAGAACTAAATTAGGAAAAGCAGGATATGTTACTG  
ACAGAGGAAGACAAAAGTTGTC

CCCCTAACTGACACAACAAATCAGAAGACTGAGTTACAAGCAATTCAGCTAGCTTTGCAAGATTCCG  
GATTAGAAGTAAACATAGTAACA

GACTCACAAATATGCATTAGGAATCATTCAAGCACAAACCAGATAAGAGCGAATCAGAGGTAGTCAGT  
CAAATAATAGAGCAGTTAATAAAA

AAGGAAAAGGTCTACCTGGCCTGGGTGCCAGCACACAAAGGGATAGGAGGAAATGAACAGGTAGA  
TAAATTAGTCAGTTCTGGAATCAGG

AAAATACTATTTTTAGATGGAATAGATAAGGCCCAAGAAGACCATGAGAAATATCACAGTAATTGGA  
GAGCAATGGCTAGTGATTTTAAAC

CTGCCACCTGTAATAGCAAAAGAAATAATAGCCAGCTGTGATAAATGTCAGCTAAAAGGAGAAGCC  
ATGCATGGACAAGTAGACTGTAGT

CCAGGAATATGGCAACTAGATTGTACACACTTAGAAGGAAAAATTATCCTGGTAGCAGTTCATGTAG  
CCAGTGGATACATAGAAGCAGAA

GTTATTCCAGCAGAGACAGGGCAAGAAACAGCATACTTTATCTTAAAATTAGCAGGAAGGTGGCCA  
GTAAAACAATACATACAGACAAT

GGCAGCAATTTACCAGTACTACAGTTAAGGCCGCCTGCTGGTGGGCGGGGATCAAGCAGGAATT  
TGGCATTCCCTACAATCCCCAAAGT

CAAGGAGTAGTAGAATCTATGAATAAAGAATTAAGAAAATTATAGGGCAAGTAAGAGATCAGGCTG  
AACATCTTAAGACAGCAGTACAA

ATGGCAGTATTCATCCACAATTTTTAAAAGAAAAGGGGGGATTGGGGGTACAGTGCAGGGGAAAG  
AATAGTAGACATAATAGCAACAGAC

ATACAACTAAAGAATTACAAAACCAATTACAAAAATTCAAAAATTTCCGGTTTATTACAGGGACAG  
CAGAGATCCACTTTGGAAGGA

CCAGCAAACTTCTCTGGAAGGTGAAGGGGCAGTGGTAATACAAGATAATAGTGACATAAAAGTA  
GTCCAAGGAGAAAAGCAAAGATC

ATTAGGGATTATGGAAAACAGATGGCAGGTGATGATTGTGTGGCAAGTAGACAGGATGAGGATTAG  
AACATGGAACAGTTTAGTAAAACA

CCATATGTATATTTCAAAGAAAGCTAGGGGATGGTCTTATAAACATCACTATGAAAACCCCCATCCA  
AGAGTAGGTTCCAGAAGTACATAT

CCCCTAGGGGATGCTAAATTGGTAGTAACAACATATTGGGGTCTGCATACAGGAGAAAGAGACTG  
GCATATGGGTGAGGGAGTCTCCAT

AGAATGGAGGAAAAAGGAATATAGCACACAAGTAGACCCTAACACAGCAGACCGACTAATCCATCT  
GTATTACTTTGATTGTTTTTCAGA

ATCTGCTATAAGAAAGGCCATATTAGGACATAGAGTTAGTCCTAGTTGTGAATATCAAGCAGGACAT  
ACAAGGTAGGATCTCTACAGTA

CCTGGCACTAGTAGCATTAGTAAAACAAAAAAGGACAAAGCCACCTTTGCCTAGTATTACAAAGCTG  
ACAGAGGATAGATGGAACAAGCC

CCAGAAGACCAAGGGCCACAGAGGGAGCCATACCATGAATGGACACTAGAGCTTTTAGAGGAGCT  
TAAGCATGAAGCTGTCAGACATTTT

CCTAGGCCATGGCTCCATGGCTTAGGGCAACACATCTATGAACTTATGGGGATACTTGGGCAGGA  
GTGGAGGCCATAATAAGAATATTG

CAACACTACTGTTTATTCATTTTCTAGAAATTGGGTGTCGACATAGCAGAATAGGCATTACTCGACAGA  
GGAGAGCAAGAAATGGAGCCAGT

AGATCCTAGACTAGAGCCCTGGAAGCATCCAGGAAGTCAGCCTAAAAGTCTTGTACCAATTGCTA  
TTGTAAAAGTGTGCTTTTATTG

CCAAGTCTGTTTACAAAAAAGCCTTAGGCATCTCCTATGGCAGGAAGAAGCGGAGACAGCGACG  
AAGAGCTCCTCAAGGCAATCAGAA

TAATCAAGTTCCTCTACCAGAACAGTAAGTAATATATGTAATGCAATCTGAAGTAATATTAGCAATAG  
TAGGATTAGTAGTAGCAGCAAT

AATAGCAATAGTTGTGTGGACCATAGTATTCATAGAATATAGGAAAATATTAAGACAAAGAAAAATAG  
ACAGGTTAATTGATAGAATAAG

AGATAGAGCAGAAGACAGTGGCAATGAGAGTGAAGGGGACCAGGAAGAATTGTCAGCACTTGTGG  
AGATGGGGCATCATGCTCCTTGGGA

TGTTGATGATCTGTAGTGTGCTGCAGACAATTTGTGGGTCACAGTCTATTATGGGGTACCTGTGTGA  
AAGAAGCAACCACCACTCTATTTT

GTGCATCAGATGCTAAAGCATATGATGCAGAAGTACATAATGTTTGGGCTACACATGCCTGTGTACC  
CACAGACCCAGCCACAAGAAA

TAAAATTGGAAAATGTGACAGAAAATTTTAAATATGTGGAAAATGGCATGGTAGAACAGATGCATGA  
GGATATAATCAGTTTATGGGATC

AAAGCCTAAAGCCATGTGTAAAATTAACCCCACTCTGTGTTACTTTACATTGCCAAAAAGTAACGATA  
GGCAATACCACTTATGTTAATA

ATAGTACAGAAGAAGAAATGAGAAACTGCTCTTTCAATACCACCACAAACATAAGAGATAAGATGCA  
AAAAGAATATGCACTTTTTTATA

GTCTTGATTTAGTATCACTAGATAATAATAAGCATAATAATAGTAGTAATAGTACCAGATATAGATTG  
ACAAGTTGTAATACCTCAGTTA

TCACACAGGCCTGCCCAAAGGTATCCTTTGAACCAATTCCCATACATTATTGTGCCCCGGCTGGTTT  
TGCGCTTTTAAAGTGAATGATA

AAAAGTTTAAATGGAACAGGGCCATGCTCAAATGTCAGCACAGTACAATGTACACATGGAATTAAGCC  
AGTAGTATCAACTCAATTGCTGT

TAAATGGCAGTTTAGCAGAAGAAGAGGTAGTAATTAGATCTAAAAATTTCACTGACAATGCTAAGAC  
CATAATAGTACAGCTGAATAAAC

CTGTAGAAATTAAGTGTACAAGACCCAACAACAATACAAGTAAAAGTATAACTATAGGACCAGGGAG  
AGCATTTTATGCAACAGAAAGAA

TAATAGGAAATATAAGACAAGCACATTGTAACATTAATGGATCAAAATGGAATAACACTTTAAGACAG  
ATAGTTACAAAATTAAGAGAAC

AATTTGGGAATAAAACAATAGTCTTTAATCAATCCTCAGGAGGGGACCCAGAAATAGTAATGCACAT  
CTTTAATTGTAGAGGGGAATTTT

TCTACTGTAATACAGCAAAGCTGTTTAATAGTACTTGGCTGTTTAATAGTACTGAAAAGCCAAATAAC  
ACCATCAATGGCACCATCACAC

TCCCATGCAGAATAAAACAATTATAAACATGTGGCAGGAAGTAGGAAAAGCAATGTATGCCCTCC  
CATCCAAGGAAACATTAGTTGTT

CATCAAATATTACAGGGCTGTTATTAACAAGAGATGGTGGTAATAACAATAATGAGAGCACCCCAGA  
GATCTTCAGACCTGGAGGAGGAA

ACATGAAGGACAATTGGAGAAGTGAATTATATAAATATAAAGTAGTAAAATTGAACCATTAGGATTA  
GCACCCACCAGGGCAAAGAGAA

GAGTGGTGCAGAGAGAAAAAGAGCAGTAACACTAGGAGCTGTGTTCCCTTGGGTTCTTGGGAGCA  
GCAGGAAGCACTATGGGCGCAGCGT

CACTGACGCTGACGGTACAGGCCAGACAATTATTGTCTGGTATAGTGCAACAGCAGAACAACCTGC  
TGAGGGCTATTGATGCGCAACAGC

ATCTGTTGCAGCTCACAGTCTGGGGCATCAAGCAGCTCCAGGCAAGAGTCCTGGCTGTAGAAAGA  
TACCTACGGGATCAACAGCTCCTAG

GGATTTGGGGTTGCTCTGGAAAACCTATTTGCACCACTACTGTGCCTTGAATACTAGTTGGAGTAA  
TAAATCTCTGGATCACATTTGGG

GTAACATGACCTGGATGGAGTGGGAAAGAGAAATTGACAATTACACAACTTAATATACACTTAAT  
TGAAGAATCACAGAACCAACAAG

AAAAGAATGAACAAGATTTATTAGAATTAGATAAATGGGCAAGTTTGTGGAGTTGGTTTGACATAAC  
AAACTGGCTGTGGTATATAAAAA

TATTCATAATGATAGTAGGAGGCTTGATAGGTTTAAGAATAGTTTTTACTGTAATTTCTATAGTGAAT  
AGAGTTAGGCAGGGATACTCAC

CATTATCGTTGCAGACCCGCTTCCCAGCCCCGGGGGACCCGACAGGCCCGAAGGAATCGAAGG  
AGAAGGTGGAGAGAGACAGAGAAC

GATCAACTCGATTAGTGCATGGATTCTTAGCACTCATCTGGGACGATCTACGGAGCCTGTGCCTCT  
TCAGCTACCACCGCTTGAGAGACT

TACTCTTGATTGCAGCGAGGGTTGTGGAACCTTCTGGGACGCAGGGGGTGGGAAGCCCTCAAATAT  
TGGGGGAGTCTTCTGCAGTATTGGA

GTCAGGAGCTAAAGAATAGTGCTGTTAGTTTGCTTAATACCACAGCTATAGTAGTAGCAGAAGGAAC  
AGATAGGGTTATAGAAGTAGTAC

AAAGAATTTGTAGAGCTATTCGCAACATACCTAGAAGAATAAGACAGGGCTTTGAAAGAGTTTTGCT  
ATAAGATGGGTGGCAAGTGGTCA

AAACGTAGTGGGGTGGATGGTCAGTTGTAAGGGAAAGAATGAGACGAGCTGAGCCAGCATCAGA  
GCCAGCAGCAGAGGGGGTGGGAGCA

GCATCTCGAGACTTGGAAAAATATGGAGCAATCACAAAGTAGCAATACAGCAGCTACCAATCCTGATT  
GTGCCTGGCTAGAAGCACAAGAG

GAGGAGGAGGTGGGTTTTCCAGTCAGACCTCAGGTACCTTTAAGACCAATGACTTACAAGGGAGCT  
CTAGATCTTAGCCACTTTTTAAAA

GAAAAGGGGGGACTGGAAGGGATGATTCACTCCCAGAAAAGACAAGAAATCCTTGACCTGTGGGT  
CTACCACACACAAGGCTACTTCCCT

GATTGGCAGAACTACACACCAGGGCCAGGGATCAGATATCCACTGACCTTTGGGTGGTGCTTCAA  
GTTAGTACCAGTGGATCCAGATAAG

GTAGAAGAGGCCACTGAAGGAGAAAACAACCTGCTTGTTACACCCTATGAACCAGCATGGGATGGAT  
GATCCGGAGAAAGAAGTGTACAG

TGGAAGTTTGACAGTCGCCTAGCATTTTACCATGTGGCCCGAGAGCTACATCCGGAGTACTACAAG  
AACTGATGACTGAGCTTTCTAC

AAGGGACTTTCCACTGGGGACTTTCCAGGGGAGGTGTGGCCAGGGCGGGACTGGGGAGTGGCGA  
GCCCTCAGATGCTGCATATAAGCAGC

TGCTTTTTGCCTGTACTGGGTCTCTCTGGTTAGACCAGATCTGAGCCTGGGAGCTCTCTGGCTGAC  
TAGGGAACCCACTGCTTAAGCCTC

AATAAAGCTTGCCTTGAGTGCTTTAAGTAGTGTGTGCCCGTCTGTTGTGTGACTCTGGTAACTAGAG  
ATCCCTCAGACCTTTAGTCAGT

GTGGAATCTCTAGCA

**>02006\_chr10\_sc (9748 bp) Sequence of the provirus with ID chr10:41845251-42110306**

TGGAAGGGATGATTTACTCCCAGAAAAGACAAGAAATCCTTGACTTGTGGGTCTACCACACACAAG  
GCTACTTCCCTGATTGGCAGAACT

ACACACCAGGGCCAGGGACCAGATATCCACTGACCTTTGGGTGGTGCTTCAAGTTAGTACCAGTG  
GATCCAGATAAAGTAGAAGAGGCCA

CTGAAGGAGAAAACAACCTGCTTGTTACACCCTCTGAACCAGCACGGGATGGATGATCCAGAGAAG  
GAAGTGTTAATATGGCAGTTTGACA

GTCACCTAGCATTTTACCATGTAGCTCGAGAGAAACATCCGGAGTACTACAAGAACTGATGACT  
GAGCTTTCTACAAGGGACTTTCCA

CTGGGGACTTTCCAGGGGAGGTGTGGCCTGGGCGGGACTGGGGAGTGGCGAGCCCTCAGATGCT  
GCATATAAGCAGCTGCTTTTCGCCTG

TACTGGGTCTCTCTGGTTAGACCAGATCTGAGCCTGGGAGCTCTCTGGCTGACTAGGGAACCCACT  
GCTTAAGCCTCAATAAAGCTTGCC

TTGAGTGTTTAAGTAGTGTGTGCCCGTCTGTTGTGTGACTCTGGTAACTAGAGATCCCTCAGACCA  
TTTAGTCAGTGTGGAATCTCT

AGCAGTGGCGCCCGAACAGGGACTTGAAAACGAAAGTAAGGCCAGAGGAGATCTCTCGACGCAG  
GACTCGGCTTGCTGAAGCGCGCACAG

CAAGAGCGAGGGGCGGCGACTGGTGAGTACGCCATTTTTGACTAGCGGAGGCTAGAAGGAGAG  
AGATGGGTGCGAGAGCGTCAATATTA



AGCGGGGGAAAATTAGATGCATGGGAAAAAATTCGGTTAAGGCCAGGAGGAAAGAAACAATATAAG  
CTAAAACATTTAGTATGGGCAAGC

AGGGAGTTAGAACGATTCGCGGTTAACCCCTGGCCTGTTAGAAACATCTGAAGGCTGTAAACAAATA  
ATAGCACAGCTACAACCATCCTTA

AAGACAGGATCAGAAGAACTTAAATCATTATTTAATACAGTAGCAGTACTCTATTGTGTACACCAGA  
GGATAGAGGTAAGAGACACCAAG

GAAGCTTTAGATAGGATAGAGGAAGAGCAAAATAAAAGTAAGAAAAAGGAACAGCAAGCAGCAGCT  
GACGCAGGAAGCAGCAGCAAGGTC

AGCCAAAATTACCCTATAGTGCAAATCTACAGGGACAAATGGTACATCAGCCTATATCACCTAGAA  
CTTTAAATGCATGGGTGAAGTA

GTAGAAGAGAAGGCTTTTCAGCCCAGAAGTAATACCCATGTTTACAGCATTATCAGAAGGAGCCACC  
CCACAAGATTTAAACACCATGCTA

AACACGGTGGGGGGACACCAAGCAGCCATGCAAATGTTAAAAGAGACCATCAATGAGGAAGCTGC  
AGAATGGGATAGATTGCATCCAGTA

CAGGCAGGGCCTGTTGCACCAGGCCAGATAAGAGAACCAAGGGGAAGTGACATAGCAGGAACTAC  
TAGTACCCTTCAGGAACAAATAGCA

TGGATGACACATAATCCACCTGTCCCAGTAGGAGAAATCTATAAAAGATGGATAATCCTGGGATTAA  
ATAAGATAGTAAGAATGTATAGC

CCTACCAGCATTCTGGACATAAGACAAGGACCAAAGGAACCCCTTTAGAGACTATGTAGACCGGTTT  
TATAAGACTCTAAGAGCTGAGCAA

GCTTCACAGGATGTAAAAAATTGGATGACAGAAACCTTGTTGGTCCAAAATTCAAACCCAGATTGTA  
AGACTATTTTAAAAGCATTGGGA

CCAGGAGCTACACTAGAAGAAATGATGACAGCATGTCAGGGAGTAGGGGGACCCGGCCACAAAGC  
AGAATTTTGGCGGAAGCAATGAGC

CAAGCAACAGGTGCAGCTACCATAATGATGCAGAAAGGCAATTTTAGGAACCAAAGAAAACTGTT  
AAGTGTTCATTGTGGCAAAGAG

GGGCACATAGCCAGAAATTGCAGGGCCCCTAGGAAAAAGGGCTGTTGGAAATGTGGAAAGGAAGG  
ACATCAAATGAAAGATTGTATTGAG

AGACAGGCTAATTTTTTAGGGAAAATCTGGCCTTCCCACAAGGGAAGGCCAGGGAATTTTCTTCAG  
AGCAGACCAGAGCCAACAGCCCCA

CCAGCCCCACCAGAAGAAAGCTTCAGGTTTGGGGAAGACACAACAACCTCCCCATCAGAAGCCGGA  
GGTATAGACAAGGAAATGTATCCT

TTGACTTCCCTCAAATCACTCTTTGGCAGCGACCCCTCGTCACAATAAAGATAGGGGGGCAGCTAA  
AGGAAGCTCTATTAGATACAGGAG

CAGATGACACAGTATTAGAAGAAATGAATTTGCCAGGAAGATGGAAACCAAAAATGATAGGGGGAA  
TTGGAGGTTTTATCAAAGTAAGAC

AGTATGATCAGGTGCCACTAGAAATATGTGGACATAAAGCTATAGGTACAGTATTAGTAGGACCTAC  
ACCTGTCAACATAATTGGAAGAA

ATCTGTTGACTCAGCTTGGCTGTACTTTAAATTTCCATTAGTCCTATTGAAACTGTACCAGTAAAA  
TTAAAGCCAGGAATGGATGGCC

CAAAAGTTAAACAATGGCCATTGACAGAAGAAAAATAAAAGCATTAGTAGAAATTTGTACAGAAAT  
GGAAAAGGAAGGAAAAATTTCAA

AAATTGGGCCTGAAAATCCATACAACACTCCAGTATTTGCTATAAAGAAAAAAGATAGTACTAAATG  
GAGAAAATTAGTAGATTTTCAGAG

AACTTAATAAGAGAACTCAAGACTTCTGGGAAGTTCAGTTAGGAATACCACATCCTGCAGGGTTAAA  
AAAGAAAAAATCAGTAACAGTAC

TAGATGTGGGTGATGCATATTTTTTCAGTTCCCTTAGATAAAGACTTCAGGAAGTATACTGCATTTACC  
ATACCCAGTACAAACAATGAGA

CACCAGGGATTAGATATCAGTACAATGTGCTTCCACAGGGATGGAAAGGATCACCAGCAATATTCC  
AATGTAGCATGACAAAAATTTAG

AGCCTTTTAGAAAACAACCCCAGATATAGTTATCTATCAATACATGGATGATTTGTATGTAGGATCT  
GACTTAGAAATAGGACAGCATA

GAACAAAAATAGAAGAACTGAGACAACACTTGTTAAAATGGGGATTTACTACACCAGACAAAAAACA  
TCAGAAAGAACCTCCATTCCTTT

GGATGGGTTATGAACTCCATCCTGATAAGTGGACAGTACAGCCTATAGTGCTGCCAGAAAAAGACA  
GCTGGACTGTCAATGACATACAGA

AGTTAGTAGGAAAATTAATTGGGCAAGTCAGATTTACCCAGGGATTAAAGTAAGACAATTATGTAA  
ACTCCTTAGAGGAACCAAAGCAC

TACAGAAGTAATAACTCTAACAGAAGAAGCAGAGTTAGAAGTGGCAGAAAACAGGGAAATTCTAAA  
AGAACCAGTACATGGAGTGTATT

ATGACCCATCAAAGACTTAATAGCAGAAATACAGAAGCAGGAGCAAGGCCAGTGGACATATCAA  
TTTATCAAGAGCCATTTAAAAACC

TGAAAACAGGAAAATATGCAAGAGTGAGGGGTGCCACACTAATGATGTAAGACAATTAACAGAGG  
CAGTGCAAAAAATAGCCACAGAAA

GCATAGTGATATGGGGAAAGACTCCTAAATTTAACTGCCCATACAAAAAGAAACATGGGAAGCAT  
GGTGGACAGAGTATTGGCAAGCCA

CCTGGATTCCTGAATGGGAGTTTGTCAATACCCCTCCCCTAGTGAAGTTATGGTACCAGTTAGAAAA  
AGAACCATAGTAGGAGCAGAAA

CTTTCTATGTAGATGGGGCAGCTAACAGAGAACTAACTAGGAAAAGCAGGATATGTAAGTACGACA  
GAGGAAGACAAAAGTTGTCCCC

TAACTGACACAACAAATCAGAAGACTGAGTTACAAGCAATTCAGCTAGCTTTGCAAGATTCGGGATC  
AGAAGTAAACATAGTAACAGACT

CACAATATGCATTAGGAATCATTCAAGCACACCAGATAAGAGCGAATCAGAGGTAGTCAGTCAAAT  
AATAGAGCAGCTAATAAACAAGG

AAAAGGTCTACCTGGCATGGGTGCCAGCACACAAAGGAATAGGAGGAAATGGACAGGTAGATAAG  
TTAGTCAGTTCTGGAATCAGGAAGG

TACTATTCTTAGATGGAATAGATAAGGCCCAAGAAGACCATGAGAAATATCACAGTAATTGGAGAGC  
AATGGCTAGTGATTTAACCTGC

CACCTGTAATAGCAAAAGAAATAATAGCCAGCTGTGATAAATGTCAGCTAAAAGGAGAAGCCATGC  
ATGGACAAGTAGACTGTAGTCCAG

GAATATGGCAGTTAGATTGTACACACTTAGAAGGAAAAATTATCCTGGTAGCAGTTCATGTAGCCAG  
TGGATACATAGAAGCAGAAGTTA

TTCCAGCAGAGACAGGACAAGAAACAGCATACTTTATCTTAAAATTAGCAGGAAGGTGGCCAGTAA  
AAACAATACATACAGACAATGGTA

GCAATTTACCAGTACTACAGTTAAGGCCGCCTGCTGGTGGGCAGGGATCAAGCAGGAATTTGGC  
ATTCCCTACAATCCCCAAAGTCAAG

GAGTAGTGGAATCTATGAATAAAGAATTAAGAAAATTATAGGGCAAGTAAGAGATCAGGCTGAACA  
TCTTAAGACAGCAGTACAAATGG

CAGTATTCATCCACAATTTTAAAAGAAAAGGGGGGATTGGGGGTACAGTGCAGGGGAAAGAATAG  
TAGACATAATAGCAACAGACATAC

AAACTAAAGAACTACAAAACCAAATTACAAAAATTCAAAAATTTCCGGTTTTATTACAGGGACAGCAGA  
GATCCACTTTGGAAAGGACCAG

CAAACTTCTGTGGAAAGGTGAAGGGGCAGTGGTAATACAAGATAATAGTGACATAAAAGTAGTGC  
CAAGGAGAAAAGCAAAGATCATTAA

GGGATTATGGAAAACAGATGGCAGGTGATGATTGTGTGGCAAGTAGACAGGATGAGGATTAACA  
TGGCACAGTTTAGTAAAACACCAT

ATGTATATTTCAAAGAAAGCTAAGGGATGGTCTTATAAACATCACTATGAAAACCCCCATCCAAGAG  
TAGGTTCAGAAGTACATATCCCA

CTAGGGGATGCTAAATTGGTAGTAATAACATATTGGGGTCTGCATACAGGAGAGAGAGACTGGCAT  
ATGGGTCAGGGAGTCTCCATAGAA

TGGAGGAAAAGGAATATAGCACACAAGTAGACCCTAATACAGCAGACCAACTAATCCATCTGTATT  
ACTTTGATTGTTTTTCAGAATCT

GCTATAAGAAGGGCCATATTAGGACATAGAGTTAGTCCTAGGTGTGAATATCAAGCAGGACATAAC  
AAGGTAGGATCTCTACAGTACCTG

GCACTAGTAGCATTAGTAAAACAAAAAGGACAAAGCCACCTTTGCCTAGTATTACAAAGCTGACAG  
AGGATAAATGGAACAAGCCCCAG

AAGACCAAGGGCCACAGAGGGAGCCATACAATGAATGGACACTAGAGCTTTTAGAGGAGCTTAAAC  
AGGAAGCTGTCAGACATTTTCCTA

GGCCATGGCTTCATGGCTTAGGGCAACACATCTATGAACTTATGGAGATACTTGGGCAGGAGTGG  
AGGCCATAACAAGAATATTGCAAC

AACTACTGTTTATTCATTTTCAGAATTGGGTGTCGACATAGCAGAATAGGCATTATTCGACAGAGGAG  
AGCAAGAAATGGAGCCAGTAGAT

CCTAGACTAGAGCCCTGGAAACATCCAGGAAGTCAGCCTAAACTGCTTGTACCAATTGCTATTGTA  
AAAAGTGTTGCTTTCATTGCCAA

GTCTGTTTCACAAAAAAGCCTTAGGCATCTCCTATGGCAGGAAGAAGCGGAGACAGCGACGAAGA  
GCTCCTCAAAGCAATCAGAATAAT

CAAGTTCCTCTATCAGAACAGTAAGTAATATATGTAATGCATTCTGAAGTAATATTAACAATAGTAGC  
ATTAGTAGTAGCAGCAATAATA

GCAATAGTTGTGTGGACCATAGTACTCATAGAATATAGGAAAATATTAAGACAAAGAAAAATAGACA  
GGTTAATTGATAGAATAATAGTT

AGAGCAGAAGACAGTGGCAATGAGAGTGAAGGGGACCAGGAAGAATTGTCAGCACTTGTGGACAT  
GGGGCATGATGCTCCTTGGGTTGTT

AATGATCTGTAGTGCTGCAGACAATTTGTGGGTCACAGTCTATTATGGGGTACCTGTGTGGAAAGA  
AGCAACCACCACTCTATTTTGTGC

ATCAGATGCTAAAGCATATGATGCAGAGGTACATAATGTTTGGGCTACACATGCCTGTGTACCCACA  
GACCCCAACCCACAAGAAATAAA

ATTGGAAAATGTGACAGAAAATTTTAATATGTGGAGAAATGACATGGTAGAACAGATGCATGAGGAT  
ATAATCAGTTTATGGGATCAAAG

CCTAAAGCCATGTGTAATAAACCCTCTGTGTTACTATGGATTGCCATCATGAAGTAAAGGTA  
GAAAATGCTACTGGATTACAGAA

TACCACTTTTATTAATAATAAAACAGAAGAAATGAGAACTGCTCTTTCAATACCACCACAAGCATAA  
GAGATAAGATGCAGAAAGAATA

TGCAATTTTTTATAAACTTGATTTAGTACCACTAAATAATAAAGGATAATAGTAGTAGTAATAGTAG  
CTATAGATTGATAAATTGTAA

TACCTCAGTTATCACACAGGCCTGTCCAAAGATAACCTTTGAACCAATTCCCATACATTATTGTACC  
CCGGCTGGTTTTGCACTTTTAAA

GTGTAATGATAAACAGTTTAAATGGAACAGGGCCATGCTCAAATGTCAGCACAGTACAATGTACACAT  
GGAATTAAGCCAGTAGTATCAAC

TCAATTGCTGTAAATGGCAGTTTAGCAGAAGAAGAGGTAGTAATTAGATCTGAAAATTTCACTGAC  
AATGCTAAGACCATAATAGTACA

GCTAAAAGAACCTGTAGAAATTAAGTGTACAAGACCTGGCAACAATACAAGTAAAAGTATATCTATA  
GGACCAGGGAGAGCATTTTATGC

AACAGGAAGAATAATAGGAGATATAAGACAAGCACATTGTAACCTTAGTAGATCACAATGGAATAAC  
ACTTTAAAAGATATAGTTGCAA

ATTAAGAGAACAATTTGGGAATAAAACAATAGTCTTTAATCGATCCTCAGGAGGGGACCCAGAAATA  
GTAATGCACATCTTTAATTGTAG

AGGGGAATTTTTCTACTGTAATACAACAAAGCTGTTAATAGTACTTGGCTGTCTAATAGTACTTTGA  
ATTACTGACCAGTCAAATGA

CACCATCACACTCCCATGCAAAATAAAACAAATTATAAACATGTGGCAGGAAGTAGGAAAAGCAATG  
TATGCCCTCCCATCCAAGGAAA

CATTAGTTGTTTCATCAAAAATTACAGGGCTGTTATTAACAAGAGATGGTGGTAATAACAATAATGAGA  
GCGCCCCAGAGATCTTCAGACC

TGGAGGAGGAAACATGAAGGACAATTGGAGAAGTGAATTATATAAATATAAAGTAGTAAAAATTGAA  
CCATTAGGAGTAGCACCCACCAG

GGCAAAGAGAAGAGTGGTGCAGAGAGAAAAAAGAGCAGTAACACTAGGAGCTGTGTTCCCTTGGGT  
TCTTGGGCGCAGCAGGAAGCACTAT

GGGCGCAGCGTCACTGACGCTGACGGTACAGGCCAGACAATTATTGTCTGGTATAGTGCAACAGC  
AGAACAATCTGCTGAGGGCTATTGA

TGCGCAACAGCATCTGTTGCAGCTCACAGTCTGGGGCATCAAGCAGCTCCAGGCAAGAGTCCTGG  
CTGTAGAAAGATACCTACGGGATCA

ACAGCTCCTAGGGATTTGGGGTTGCTCTGGAAACTCATTTGCACCACTACTGTGCCTTGAATAC  
TAGTTGGAGTAATAAATCTCTGGA

TCACATTTGGGGTAACATGACCTGGATGGAGTGGGAAAGAGAAATTGACAATTACACAAGCTTAATA  
TATAACTTAATTGAAGAATCACA

GAACCAACAAGAAAAGAATGAAAAAGATTTATTAGAATTAGATAAATGGGACAGTTTGTGGAGTTGG  
TTTGACATAACAACTGGCTGTG

GTATATAAGAATATTCATAATGATAGTAGGAGGCTTGATAGGTTTAAAAATAGTTTTTACTGTAATTC  
TATAATAAATAGAGTTAGGCA

GGGATACTCACCATTATCGTTGCAGACCCGCTTCCCAGCCCCGGGGGGACCCGACAGGCCCGAA  
GGAATCGAAGGAGAAGGTGGAGAGAG

AGACAGAGAACGATCAACTCGATTAGTGCATGGATTCTTCGCACTCATCTGGGACGATCTACGGAG  
CCTGTGCCTCTTCAGCTACCACCG

CTTGAGAGACTTACTCTTGATTGCAGCGAGGGTTGTGGAACCTTCTGGGACGCAGGGGGTGGGAAG  
CTCTCAAATATTGGGGGAGTCTTCT

GCAGTATTGGAGTCAGGAGCTAAAGAATAGTGCTGTTAGTTTGCTTAATACCACAGCTATAGTAGTA  
GCAGAAGGAACAGATAGGATTAT

AGAAGTAGCACAAAGAATTTGTAGAGCTATTCGCCATATACCTAGAAGAATAAGACAGGGCTTTGAG  
AGAGCTTTGCTATAAGATGGGTG

GCAAGTGGTCAAACGTAAGTAGGGAGGGATGGTCAGTTATAAGGGAAAGAATGAGACGAGCTGAG  
CCAGCAGCAGAGCCAGCAGCAGAGG

GGGTGGGAGCAGCATCTCGAGACTTGGAAAAATATGGAGCAATCACAAGTAGCAATACAGCAGCTA  
CCAATGCTGATTGTGCCTGGCTGG

AAGCACAAAGAGGAGGAGGAGGTGGGTTTTCCAGTCAGACCTCAGGTACCTTTAAGACCAATGAATT  
ACAAGGGAGCTGTAGATCTTAGCC

ACTTTTTAAAAGAAAAGGGGGGACTGGAAGGGATGATTTACTCCCAGAAAAGACAAGAAATCCTTG  
ACTTGTGGGTCTACCACACACAAG

GCTACTTCCCTGATTGGCAGAACTACACACCAGGGCCAGGGACCAGATATCCACTGACCTTTGGGT  
GGTGCTTCAAGTTAGTACCAGTGG

ATCCAGATAAAGTAGAAGAGGCCACTGAAGGAGAAAACAACCTGCTTGTTACACCCTCTGAACCAGC  
ACGGGATGGATGATCCAGAGAAGG

AAGTGTTAATATGGCAGTTTGCAGTACCTAGCATTTCACCATGTAGCTCGAGAGAAACATCCGGA  
GTACTACAAGAACTGATGACT

GAGCTTTCTACAAGGGACTTTCCACTGGGGACTTTCCAGGGGAGGTGTGGCCTGGGCGGGACTGG  
GGAGTGGCGAGCCCTCAGATGCTGC

ATATAAGCAGCTGCTTTTCGCCTGTACTGGGTCTCTCTGGTTAGACCAGATCTGAGCCTGGGAGCT  
CTCTGGCTGACTAGGGAACCCACT

GCTTAAGCCTCAATAAAGCTTGCCTTGAGTGTTTTAAGTAGTGTGTGCCCGTCTGTTGTGTGACTCT  
GGTAACTAGAGATCCCTCAGACC

ATTTAGTCAGTGTGGAAAATCTCTAGCA

>02006\_cen 9760 bp Sequence of the provirus with ID chr13:16283554-17732159

TGGAAGGGTTGATTTATTCCCAGCAAAGACAAGAAATCCTTGACTTGTGGGTCTACCACACACAAG  
GCTACTTCCCTGATTGGCAGAACT

ACACACCAGGGCCAGGGACCAGATATCCACTGACCTTTGGGTGGTGCTTCAAGTTAGTACCAGTG  
GATCCAGATAAAGTAGAAGAGGCCA

CTGAAGGAGAAAACAACCTGCTTGTTACACCCTCTGAACCAGCACGGGATGGATGATCCAGAGAAG  
GAAGTGTTAATGTGGAAGTTTGACA

GTCGCCTAGCATTTCCACCATGTGGCCCGAGAGCTACATCCGAGTACTACAAGAAGCTGATGACACTG  
TGCTTTCTACAAGGGACTTTCCAC

TGGGGACTTTCCAGGGGAGGTGTGGCCTGGGCGGGACTGGGGAGTGGCGAGCCCTCAGATGCTG  
CATATAAGCAGCTGCTTTTTGCCTGT

ACTGGGTCTCTCTGGTTAGACCAGATCTGAGCCTGGGAGCTCTCTGGCTGACTAGGGAACCCACT  
GCTTAAGCCTCAATAAAGCTTGCCT

TGAGTGCTTTAAGTAGTGTGTGCCCGTCTGTTGTGTGACTCTGGTAACTAGAGATCCCTCAGACCA  
TTTAGTCAGTGTGGAAAATCTCTA

GCAGTGGCGCCTGAACAGGGACTTGAAAGCGAAAGTAAGGCCAGAGGAGATCTCTCGACGCAGG  
ACTCGGCTTGCTGAAGCGCGCACGGC

AAGAGGCGAGGGGCGGCGACTGGTGAGTACGCCATTTTTTACTAGCGGAGGCTAGAAGGAGAG  
AGATGGGTGCGAGAGCGTCAATATTA

AGCGGGGGAAAATTAGATGCATGGGAAAAAATTCGGTTAAGGCCAGGAGGAAAGAAACAATATAAG  
CTAAAACATCTAGTATGGGCAAGC

AGGGAGTTAGAACGATTGCGGGTTAACCCCTGGCCTGTTAGAAACATCAGAAGGCTGTAAACAAATA  
ATAGGACAGCTACAACCATCCTTA

AAGACAGGATCAGAAGAAGCTTAAATCATTATTTAATACAGTAGCAGTACTCTATTGTGTACACCAGA  
GGATAGAGGTAAGAGACACCAAG

GAAGCTCTGGATAAGATAGAGGAAGAGCAAATAAAAGTAAGAAAAAGGAACAGCAAGCAGCAGCT  
GACGCAGGAAGCAGCAGCAAGGTC

AGCCAAAATTACCCTATAGTGCAGAAGCTTACAGGGACAAATGGTACATCAGCCTATATCACCTAGAA  
CTTTAAATGCATGGGTGAAAGTA

GTAGAAGAGAAGGCTTTTCAGCCCAGAAGTAATACCCATGTTTACAGCATTATCAGAAGGAGCCACC  
CCACAAGATTTAAACACCATGCTA

AACACGGTGGGGGGACACCAAGCAGCCATGCAAATGTTAAAAGAGACCATCAATGAGGAAGCTGC  
AGAATGGGATAGATTGCATCCAGTG

CAGGCAGGGCCTGTCGCACCAGGCCAAATAAGAGAACCAAGGGGAAGTGACATAGCAGGAACTAC  
TAGTACCCTTCAGGAACAAATAGCA

TGGATGACACATAATCCACCTGTCCCAGTAGGAGAAATCTATAAAAGATGGATAATCCTGGGATTAA  
ATAAAATAGTAAGAATGTATAGC

CCTACCAGCATTCTGGACATAAGACAAGGACCAAGGAACCCTTTAGAGACTATGTAGACCGGTTTC  
TATAAGACTCTAAGAGCTGAGCAA

GCTTCACAGGATGTA AAAAATTGGATGACAGAAACCTTGTTGGTCCAAAATTC AAACCCAGATTGTA  
AGACTATTTTTAAAAGCATTGGGA

CCAGGAGCTACACTAGAAGAAATGATGACAGCATGTCAGGGAGTGGGGGGACCCGGCCACAAAG  
CAAGAATTTTTGGCGGAAGCAATGAGC

CAAGCAACAGGTGCAGCTACCATAATGATGCAGAAAGGCAATTTTAGGAACCAAAGGAAA ACTGTT  
AAGTGTTTTCAATTGTGGCAAAGAA

GGGCATATAGCCAAAATTGCAGGGCCCCTAGGAAAAAGGGCTGTTGAAATGTGGAAAGGAAGG  
ACACCAAATGAAAGATTGTATTGAG

AGACAGGCTAATTTTTTAGGGAAAATCTGGCCTTCCCACAAGGGAAGGCCAGGGAATTTTCTTCAG  
AGCAGACCAGAGCCAACAGCCCCA

CCAGCCCCACCAGAAGAGAGCTTCAGGTTTGGGGAAGAGACAACA ACTCCCCATCAGAAGCCGGA  
GGTGATAGACAAGGAAATGTATCCT

TTGGCTTCCCTCAAATCACTCTTTGGCAGCGACCCCTCGTCACAATAAAGATAGGGGGGCAGCTAA  
AGGAAGCTCTATTAGATACAGGAG

CAGATGACACAGTATTAGAAGAAATGAATTTGCCAGGAAGATGGAAACCAA AAAATGATAGGGGGAA  
TTGGAGGTTTTATCAAAGTAAGAC

AGTATGATCAGGTACACATAGAAATATGTGGACATAAAGCTATAGGTACAGTATTAATAGGACCTAC  
ACCTGTCAACATAATTGGAAGAA

ATCTGTTGACTCAGCTTGGCTGTACTTTAAATTTTCCCATTAGTCCTATTGAAACTGTACCAGTAAA  
TTAAAACCAGGAATGGATGGCC

CAAAAGTTAAACAATGGCCATTGACAGAAGAAAAATAAAAGCATT AATAGAAATTTGTACAGAAATG  
GAAAAGGAAGGGAAAATTTCAA

AAATTGGGCCTGAAAATCCATACAACACTCCAGTATTTGCCATAAAGAAAAAGGATAGTACTAAATG  
GAGAAAATTAGTAGATTTTCAGAG

AACTTAATAAGAGAACTCAAGACTTCTGGGAAGTTCAATTAGGAATACCACACCCTGCAGGGTTAAA  
AAAGAAAAATCAGTAACAGTAC

TAGATGTGGGTGATGCATATTTTTTCAGTTCCTTAGATAAAGACTTCAGGAAGTATACTGCATTTACC  
ATACCTAGTACAAACAATGAGA

CACCAGGGATTAGATATCAGTACAATGTGCTTCCACAAGGATGGAAAGGATCACCAGCAATATTCC  
AATGTAGTATGACAAAAATTTTAG

AGCCTTTT TAGAAAACAACATCCAGATATAGTTATCTATCAATACATGGATGATTTGTATGTAGGATCT  
GACTTAGAAATAGGACAGCATA

GAACAAAAATAGAAGAACTGAGACAACACTTGTTGAAGTGGGGATTTACTACACCAGACAAAAAACA  
TCAGAAAGAACCTCCATTCCTTT

GGATGGGTTATGAACTCCATCCTGATAAATGGACAGTACAGCCTATAGTGCTGCCAGAAAAAGACA  
GCTGGACTGTCAATGACATACAGA

AATTAGTGGGAAAATTGAATTGGGCAAGTCAGATTTACCCAGGGATTAAAGTAAGGCAATTATGTAA  
ACTCCTTAGGGGAACCAAAGCAC

TACAGAAGTAATAACTCTAACAGCAGAAGCAGAGTTAGAACTGGCAGAAAACAGGGAAATTCTAAA  
AGAACCAGTACATGGAGTGTATT

ATGACCCCTCAAAGACTTAATAGCAGAAATACAGAAGCAGGATCAAGGCCAATGGACATATCAAAT  
TTATCAAGAGCCATTTAAAAACC

TGAAAACAGGAAAATATGCAAAAATGAGGGGTGCCCACTAACGATGTAAGACAATTAACAGAGG  
CAGTGCAAAAATAGCCACAGAAA

GCATAGTAATATGGGGAAAGACTCCTAAATTTAACTACCCATACAAAAGAAACATGGGAAGCATG  
GTGGACAGAGTATTGGCAAGCCA

CCTGGATTCCTGAATGGGAGTTTGTCAATACCCCTCCCCTAGTGAAGTTATGGTACCAGTTAGAAAA  
AGAACCCATAGTAGGAGCAGAAA

CTTTCTATGTAGATGGGGCAGCTAACAGGGAACTAACTAGGAAAAGCAGGATATGTTACTGACA  
GAGGAAGACAAAAGGTTGTCCCC

TAACTGACACAACAAATCAGAAGACTGAGTTACAAGCAATTCAGCTAGCTTTGCAAGATTCGGGATC  
AGAAGTAAACATAGTAACAGACT

CACAATATGCATTGGGAATCATTCAAGCACACCAGATAAGAGCGAATCAGAGGTAGTCAGTCAA  
TAATAGAGCAGCTAATAACAAGG

AAAAGGTCTACCTGGCCTGGGTGCCAGCACATAAAGGGATAGGAGGAAATGAACAGGTAGATAAAT  
TAGTCAGTTCTGGAATCAGGAAAA

TACTATTTTTAGATGGAATAGATAAAGCCCAAGAAGATCATGAGAAATATCACAGTAATTGGAGAGC  
AATGGCTAGTGATTTAACCTGC

CACCGGTAATAGCAAAAGAAATAATAGCCAGCTGTGATAAATGTCAGCTAAAAGGAGAAGCCATGC  
ATGGACAAGTAGACTGTAGTCCAG

GAATATGGCAACTAGATTGTACACATTTAGAAGGAAAAATTATCCTGGTAGCAGTTCATGTAGCCAG  
TGGATACATAGAAGCAGAAGTTA

TTCCAGCAGAGACAGGGCAAGAAACAGCATACTTTATCTTAAAATTAGCAGGAAGGTGGCCAGTAA  
AACAATACATACAGACAATGGCA

GCAATTTACCAGTACTACAGTTAAGGCCGCTGCTGGTGGGCGGGGATCAAGCAGGAATTTGGC  
ATTCCCTACAATCCCCAAAGTCAAG

GAGTAGTGGAATCCATGAATAAAGAATTAAGAAAATTATAGGGCAAGTAAGAGATCAGGCTGAACA  
TCTTAAGACAGCAGTACAAATGG

CAGTATTCATCCACAATTTAAAAGAAAAGGGGGGATTGGGGGTACAGTGCAGGGGAAAGAATAG  
TAGACATAATAGCAACAGACATAC

AACTAAAGAACTACAAAATCAAATTACAAAATTCAAATTTTCGGGTTTATTACAGGGACAGCAGA  
GATCCACTTTGGAAAGGACCAG

CAAACTTCTGTGGAAAGGTGAAGGGGCAGTGGTAATACAAGATAATAGTGACATAAAAGTAGTGC  
CAAGGAGAAAAGCAAAGATCATT

GGGATTATGGAAAACAGATGGCAGGTGATGATTGTGTGGCAAGTAGACAGGATGAAGATTAGAACA  
TGGCACAGTTTAGTAAAACATCAT

ATATATATTTCAAAGAAAGCTAGGGGGTGGTCTTATAAACATCACTATGAAAACCCCATCCAAGAG  
TAGGTTCCAGAAGTACATATCCCA

CTAGGGGATGCTAAATTGGTAGTAACAACATATTGGGGTCTGCATACAGGAGAAAGAGACTGGCAT  
ATGGGTCAGGGAGTCTCCATAGAA



TGGAGGAAAAAGGAATATAGCACACAAGTAGACCCTAACACAGCAGACCGACTAATCCATCTGTAT  
TACTTTGATTGTTTTTCAGAATCT

GCTATAAGAAAGGCCATATTAGGACATAGAGTTAGTCCTAGGTGTGAATATCAAGCAGGACATAACA  
AGGTAGGATCTCTACAGTACCTG

GCACTAGTAGCATTAGTAAAACAAAAAAGAACAAAGCCACCTTTGCCTAGTATTTCAAAGCTGACAG  
AGGATAGATGGAACAAGCCCCAG

AAGATCAAGGGCCACAGAGGGAGCCATACAATGAATGGACACTAGAGCTTTTAGAGGAGCTTAAGC  
AAGAAGCTGTCAGACATTTTCCTA

GGCCATGGCTTCATGGCTTAGGGCAACACATCTATGAAACCTATGGAGATACTTGGGCAGGAGTG  
GAGGCCATAACAAGAATATTGCAAC

AACTACTGTTTATTCATTTTCAGAATTGGGTGTCGACATAGCAGAATAGGCATTACTCGACAGAGGAG  
AGCAAGAAATGGAGCCAGTAGAT

CCTAGACTAGAGCCCTGGAAGCATCCAGGAAGTCAGCCTAAAACCTGCTTGTACCAATTGCTATTGT  
AAAAAGTGTGCTTTTCATTGCCAA

GTCTGTTTTCACAAAAAAGCCTTAGGCATCTCCTATGGCAGGAAGAAGCGGAGACAGCGACGAAGA  
GCTCCTCAAGGCAATCAGAATAAT

CAAGTTCCTCTATCAGAACAGTAAGTAATATATGTAATGCATTCTGAAGTAATATTAACAATAGTAGC  
ATTAGTAGTAGCAGCAATAATA

GCAATAGTTGTGTGGACCATAGTATTAATAGAATATAGGAGAATATTAAGACAAAGAAAAATAGACA  
GGTTAATTGATAGAATAATAGAT

AGAGCAGAAGACAGTGGCAATGAGAGTGAAGGGGACCAGGAAGAATTGTCAGCACTTGTGGAGAT  
GGGCATGATGCTCCTTGGGTTGTT

AATGATCTGTAGTGTGTCAGACAATTTGTGGGTCACAGTCTATTATGGGGTACCTGTGTGGAAAGA  
AGCAACCACCACTCTATTTTGTGC

ATCAGATGCTAAAGCATATGATGCAGAGGTACATAATGTTTGGGCTACACATGCCTGTGTACCCACA  
GACCCCAACCCACAAGAAATAAA

ATTGAAAAATGTGACAGAAAATTTTAATATGTGGAGAAATGACATGGTAGAACAGATGCATGAGGAT  
ATAATCAGTTTATGGGATCAAAG

CCTAAAGCCATGTGTGAAATTAACCCCACTCTGTGTTACTTTAGATTGCCATTATGAAGTAAAGATA  
GAAAATGCCACTGGATTTGGGAA

TACCACTTTTATTAATAATAAAACAGAAGAAATGAGAAACTGCTCTTTCAATACCACCACAAGCATAA  
GAGATAAGATGCAGAAAGAATA

TGCAATTTTTTATAAACTTGATTTAGTACAACCTAGATAGTAATAAGCATAATAGTAGTAATAATACCAG  
ATATAGATTGATAAATTGTAA

TACCTCAGTTATCACACAAGCCTGTCCAAAGATAACCTTTGAACCAATTCCCATACATTATTGTACCC  
CGGCTGGTTTTGCGCTTCTAAA

GTGTAATGATAAAAAGTTTAATGGAACAGGGCCTTGCTCAAATGTCAGCACAGTACAATGCACACAT  
GGAATTAAGCCAGTAGTATCAAC

TCAATTGCTGTAAATGGCAGTTTATGAGAAAGAAGAGGTAGTAATTAGATCTGAAAATTTCACTGAC  
AATGCTAAGACCATAATAGTACA

GCTAAAAGAACCTGTAGAAATTAAGTGTACAAGACCCGGCAACAATACAAGTAAAAGTATAACTATA  
GGACCAGGGAGAGCATTATGTC

AACAGGGAGAATAATAGGAGATATAAGACAAGCACATTGTAACCTTAGTAGATCACAATGGAATAAC  
ACTTTAAAAGATATAGTTAAAAA

ATTAAGAGAACAATTTGGGAATAAAACAATAGCCTTTAAAAATTCTCAGGAGGGGACCCAGAAATA  
GTAATGCACATCTTTAATTGTAG

AGGGGAATTTTTCTACTGTAATACAACAAAGCTGTTTAGTAGTATTTGGCTGTCTAATAGTACTTTGA  
ATTACACTAAAAAGTCAAATAG

CACCATCAATGACACCATCACACTCCCATGCAGAATAAAACAATCATAAACATGTGGCAGGAAGTA  
GGAAAAGCAATGTATGCCCTCC

CATCCAAGGAAACATTAGTTGTTTCATCAAAAATTACAGGGCTGTTATTAACAAGAGATGGTGGTAAT  
AACATAATGAGAGCGCCCCAGA

AATCTTCAGACCTGGAGGAGGAAACATGAAGGACAATTGGAGAAGTGAATTATATAAATATAAAGTA  
GTAAAAATTGAACCATTAGGAGT

AGCACCCACCAGGGCAAAGAGAAGAGTGGTGCAGAGAGAAAAAGAGCAGTAACACTAGGAGCTG  
TGTTCTTGGGTTCTTGGGAGCAGC

AGGAAGCACTATGGGCGCAGCGTCATTGACGCTGACGGTACAGGCCAGACAATTATTGTCTGGTAT  
AGTGCAACAGCAGAACAACCTGCT

GAGGGCTATTGATGCGCAACAGCATCTGTTGCAGCTCACAGTCTGGGGCATCAAGCAGCTCCAGG  
CAAGAGTCCTGGCTGTAGAAAGATA

CCTAAGAGATCAACAGCTCCTAGGGATTTGGGGTTGCTCTGGAAAACCTATTTGCACCACTACTGT  
GCCCTGGAATACTAGTTGGAGTAA

TAAATCTCTGGATCACATTTGGGGTAACATGACCTGGATGGAGTGGGAAAGAGAAATTGACAATTA  
CACAAAGCTTAATATACACCTTAAT

TGAAGAATCACAGAACCAACAAGAAAAGAATGAACAAGATTTATTAGAATTAGATAAATGGGACAGT  
TTGTGGAGTTGGTTTGACATAAC

AAACTGGCTGTGGTATATAAGAATATTCATAATGATAGTAGGAGGCTTGATAGGTTTAAGAATAGTG  
TTTACTGTAATTTCTATAGTAAA

TAGAGTTAGGCAGGGATACTCACCATTATCATTGCAGACCCGCTTCCCAGCCCCGGGGGGACTCG  
ACAGGCCCGAAGGAATCGAAGGAGA

AGGTGGAGAGAGAGACAGAGAACGATCAACTCGATTAGTGCATGGATTCTTCGCACTCATCTGGGA  
CGATCTACGGAGCCTGTGCCTCTT

CAGCTACCACCGCTTGAGAGACTTACTCTTGATTGCAGCGAGGGTTGTGGAACCTTCTGGGACGCA  
GGGGTGGGAAGCCCTCAAGTATTG

GGGGAGTCTTCTGCAGTATTGGAGTCAGGAGCTAAAGAATAGTGCTGTTAGTTTGCTTAATACCAC  
AGCTATAGTAGTAGCAGAAGGAAC

AGATAGGATTATAGAAGCAATACAAAGAATTTGCAGAGCTATTCGCAACGTACCTAGAAGAATAAGA  
CAGGGCTTTGAAAGAGCTTTGCT

ATAAGATGGGTGGCAAGTGGTCAAAACGTGTTGGGGATGGATGGTCAGTTGTAAGGGAAAGAATG  
AGACGAGCTGAGCCAGTAGCAGAAC

CAGCAGCAGAGGGGGTGGGAGCAGCATCTCGAGACTTGCAAAAATATGGAGCAATCACAAGTAGC  
AATACAGCAGCTACCAATGCTGATT

GTGCCTGGCTGGAAGCACAAGAGGATGAGGAGGTGGGTTTTCCAGTCAAACCTCAGGTACCTTTA  
AGACCAATGACTTACAAGGGAGCTG

TAGATCTTAGCCACTTTTTAAAAGAAAAGGGGGGACTGGAAGGGTTGATTTATTCCCAGCAAAGACA  
AGAAATCCTTGACTTGTGGGTCT

ACCACACACAAGGCTACTTCCCTGATTGGCAGAACTACACACCAGGGCCAGGGACCAGATATCCA  
CTGACCTTTGGGTGGTCTTCAAGT

TAGTACCAGTGGATCCAGATAAAGTAGAAGAGGCCACTGAAGGAGAAAACAACCTGCTTGTTACACC  
CTCTGAACCAGCACGGGATGGATG

ATCCAGAGAAGGAAGTGTTAATGTGGAAGTTTGACAGTCGCCTAGCATTTACCATGTGGCCCGAG  
AGCTACATCCGGAGTACTACAAGA

ACTGATGACACTGTGCTTTCTACAAGGGACTTTCCACTGGGGACTTTCCAGGGGAGGTGTGGCCTG  
GGCGGGACTGGGGAGTGGCGAGCC

CTCAGATGCTGCATATAAGCAGCTGCTTTTTGCCTGTACTGGGTCTCTCTGGTTAGACCAGATCTGA  
GCCTGGGAGCTCTCTGGCTGACT

AGGGAACCCACTGCTTAAGCCTCAATAAAGCTTGCCTTGAGTGCTTTAAGTAGTGTGTGCCCGTCT  
GTTGTGTGACTCTGGTAACTAGAG

ATCCCTCAGACCATTTAGTCAGTGTGGAAAATCTCTAGCA

**>BosT\_ERV\_chr11\_APOB 6777 bp**

TGCGGGGAGCCGGTGAGGCATTCCACTCGTGACAAAGGTCATGAGGAAGGAGGCTCGGCATACG  
CAAAGGCGGGATCGAGCCTCAGGAGT

CCCCCGGATATTCTCGAGCATTTTCCCCCAAAAACCAGAGTCTGCCTACTTTATTGCTTTGTGCT  
CTCACCTCTGACTTTACTGGGGG

CTGTCCCCTACCACCGTCTCTCTCTCTGTGTCAAAGAGTTAACTTACAGCTCCAATTAATAAAGTT  
CCTGGGCAATTAGGAGTGTTTA

AATCCAAACCCCTCTGATGGCTCTCTAACTCGCCTGACAAGTTTACCCGGACTCCTGCAGCTATGC  
ATACGATTGTTTACAGTCTCCCAG

CCTCGAGAGGCATGGGAAGCTTAAGATATTCAAATAGCTTAGAGCCTCTCAGAGAGTTAAAACTG  
TCAGAATAAACTAGTAAAGGATTT

CATTGATGAGTCAATGCTTGTTGCCAAGTTTTACATCCCCTGAATTGTATCCTTGAATATGTATCAA  
TTAATAGTGGGTATGTAGAAAA

AATAAGTAGTGGCCTTGGTGTTAGTAACTTTAGACCCTTAAGGTAATAAATTCTTTCTTTGTTGTAAA  
CCCATTACACATCCGCCCTATA

GGAATGCAATTTTATCTTTGGAAGATGGTGCCAAACCTTGAAATAATTACTCTTAGAGAAAAGTAAGT  
CTTTGTTGATAAGTCTTGTCAA

GAGTCATAAAATGTTAGTAGGCCTTCTGGCCAGAAGATGATGTAATCACCTAAACCATTTGTATAC  
GATACATTTGCAGGAAAGAAACC

TTGGTTTTTGATAAGAATCAAAGACTGCTGACTTTGCATCCCCTATTATCCTCTATGTGTAACCTAGG  
GTATAAAAGCCCCTGTAAAAA

TAAAGCTACGGGCCTTGCTCACCAACGCTTGGTCTCCCCATGTCATTCTTTAACTTCCAGCTGAGT  
CTCCATCTGGAGCGCGGAACCCA

CCACGCTTACTAATCATGCCTGGGCTTCTAAGACCCACTCGAGAAGGTGTCTAGGGTGAGACACCT  
TCCGCTATTCGAGAGGGCGCCTGC

GGCCTACGTAAGTGGTGCAAACCTTCTGTCTTGAAGTTTTATTGGTCTCCCGCGTAAACCAAGCTAC  
TCAGCTTCTTTTCTCCACTGAAA

TTTCCTACTGAGCTATCCTCATTCTATTGTTCTCTATATCCCTAATTAGCATATAAATAGTCGCCGAC  
GCCGTCTCCCCTTCGAATACCC

TGGATCAGCCGGGGCTGGTCTCGGCAGGTGGCGCCCGATACAGGGATTTTGAAGGTAAGTCCC  
CAACCCATTCCCCAGTGTTGAGTT

TTCGGGACGGATAGGACCCCACTTAGGGTGTGCAGACCCCCCTGTAGAATAGACAGGGAGAGAG  
GAGTGGGAAGTGTTGAAAGTGTTGA

AGAGTTAGAGAGAAAAACGATTTCTAAAAAGGCTGACAAAAAGGCCTAATCTTTTGATAGCTAAA  
AGCAAATCTTTTACTATACTTA

ATTTTCTGACATGGGTAATACTGAATCAAATGAAAGACAGCTCTTTATAGGAGTAATTTTACAGTTAT  
TAGGTAAAAGAGGAATTAAGT

TAAAAAATCTGCCATTCAATCATTCTTTTCAATTTGTACAAGAGCACTGTCCCTGGTTTCCAGACGAAG  
GCTCTGTAACTTAGATGTCTG

GGAAAAAGTAGGAAAACAGTTAAAAACTTACCATGCAGAACATGGCTCAGAAAAGGTGCCTAATGA  
CGCCTTTTCTTATGGAATATTAT

TAGAGATGTCTTAGACCCTGCCCCAGATTCAGAAAAAGTACATCTTAAAAGGGATAGTGAAGAAAAT  
GCTGTAGTTAAACCTACCCCTGA

ACCTAAAAAGTAACCTTTAAAGAGGAAAATGAAGTCGAAATCGTAGTTAAACCTGAAGAAAATGAG  
AAAAACGAAGACCCGCCTGACTA

TCGGCAACTAAGAAAAATGTTAATAGCCGTGACTACTCAGGAACAACCTAAAGATAGGGATGAGGA  
ACAAGATCAGCCTTCCCCAAAACA

AAAAGAGAATTTAGGCGAGATAACAACCTAAATATCACTCTGATGGAGATTGGCATCTCTTAAACAAA  
GATGCCCAAAGGCCTAAGAGA

AACTTCCCCTGTCAGACCATCCGCTCCTAGGAGCTTGAGGGAAACATCCCCGATCAGACAGTTTGT  
AAGATTTAGTCACCAAACAGTTAA

AGGATCTCCGGAGCAGGAGAAGAGAAAATAGGGGACGCTCCCATCCCTCCATGCCTCCTCCTCTGT  
GTGGGGGTAAAGGGCCTCCACTAGG

AGTTTCCCCGAGAAGGGTTTGCTCTAGTCCAAGGATAAATTTGATCCTCACCTTGAGGCTTCTTTT  
CTAGTCCCCTCTGCAGTTTAGAT

AGGGTAAAGAAGGTACAAAATAAATAAAAAATATTCTCAAAAAAAAAAAAAATAAATAAAAAAAAAAATG  
GTTTCTCTGCATCTAAGAATA

TACAAATGTTTATTGGCTCTGTGAAATATGATTAGAAATGTCCTGGACCCCTCTCATGAGGCTGTTA  
AATAGCCTTTGAGGGAGGCTATA

GCGGTAGATGGTGGTGGAGTCTCCAGTTTCTGCATAGATCATAATTTCTGCTATTGGAAAAAAAAAAA  
AAAAGGAGGGAGAAAAGTGCTTTA

CCTCCCGAGCAAGGAGAGGGTTTACAGGACGCTGCGGCCGAGCGCCCTGGCGAGCTCCCTCCCC  
CTCTGCGCAAACCTTTAAAAAACTTA

TCCACCACTTTCTGATTTAAGGTGATCGCCACCGCCTCCGTTTGTGCCTCCCAGGACCCAGGAGTT  
CCCCACTTTGCCCCCAAAGCCTCT

CAAAGCGTTGCCTAAGCCTGAGGAAGATAAAAAGTTTTTTGAACAGTGGAGCTTTTAAACAGACTG  
CGTGACAATATGCAGAGCATGC

TTCTTAGAGAAAACCCCCTCAGGGGGGGTCTCACCCAGGCTAGGAGAAAAGCGAAACCGCAAGGG  
GATTTAGCAACAATATTAACCCCTG

ATGTGCCGCTTACTCCAATTCCAACGGGAGTGGCTGGCCCCCTACCTTTGGACATTGTAAGATCTG  
TCCTGGGGCATAGCTCGCTTTCTT

TTCAAAAAAAAAAAAAAAAAAATTCGGTGGTGCATGGTGTAGTAGATTCTGATTATATTGAGAAATT  
AAAGTCTTGATATCACCGCCTA

CCAAAAGTGTACAAATTAATAAAGGTCAAAGAGTAACACAGCCTTTGCTTTTACCTTATTATCAGACA  
AGAAAAAAGTGGACTTCTCAAG

TTAAGAGCCACGAAACATTTGGATCTAGTGATCTAGCCTTTTGGATGCAGGAAATTACAGCTCCTGG  
CCAACACATACTACTGAAAATGA

GTTGGTGGGATTAGAGAAAGTGGTATGTGAGGTGGGGATGCTATACAGGTGGTACATTTAAACAATA  
CTTTATATATTGTTATAAATACAT

AATATAAATATATTTGCCTAATTACAGTTTGCCTAATTAGGTATGGGTATAAATAAATATAATAAAGG  
TATACCTAATTCTACTTATAG

ATCTATACTTAATTTGTATATAAATTAATATGTATACTATATATACATATATATACTGTATAAATTAAT  
GTATATTGCAGTAATATAA

TGTGTGTGGCTGATATTAATTGGTATGGATTGGTGTGCTGTGATGATATATGTTCTATATACTGTATA  
ATTGTATATGTGTGACATGCAT

TATTGCAGTACATTGGTTTGTGTTGGTTGGTATTAGCTGTGTATGTGTTGTATTGCTGTAATATATAT  
TAATTAATATATTAATTATAAA

GATTAATTCAAATATATTGATTTATATATATTATATGTCAATAAGTTTATACTTGTGCCATATATAAAT  
ACATATATAAATACATTTTA

CATTTAGGTATGTCTGTATACCAAATGAGATAAGGAGGTTATACATTTACTTAAATTTATACAG  
AGACCTAAACTAACATTAGAC

CTAAATTAACATGTCCCTAGGAAAACAGCTGGACAAATAGTAAAGTTATGTCCAAATTGTAATTAATC  
ACTTAAAGGTAAACACACAGGG

GCAGACTACAATGATGAGACACTAGATGCCTGAATTACAGGCTACGACTCGGCCCTGGTCAAGTA  
AAAAGACCTCCTTACTGGAGAGTG

TAAAAGGCCAGATGTGTTGCTAACTTGTGGGAGAGGGTATGCTTATATATTTCTACAGAATGCAGAT  
TCTCCGATTTGGATCTCAGAAAA

ATTCGTATGTCACTTTCCCCAAAGACCAGGTTTCGCGGGCGCGCACTCGCTCGCTCCCCCTCCC  
CCAGCCAGCTCTCTCCGCCGCCAGC

GCGGCCCTGCACCCTCCTTGCTGCACCCCGAGACCTAGAGCAAAGAAGTCTGTGCGGCGAGTGA  
GGCCAGAGAGGAAAGCGCGCCCGCG

CAGTGCAGTCCAGACCAGCGCGCTCCCGCCGCGGGCGACAGGAAAACGCCCCGAGCCCAAGCG  
GCGCGGCTAGCCCGAGTCCGCGAACCC

CGCCCCTCCGCCCGCCGTAGACGCCTCGGCCACAACCTGCCGTTGCGGTTCTGCCTCCTGATGC  
TGGGACACTGCTCCGCCGAGCCGA

TGCCTACAGCTGCTCCTTGCTCATCTTGTTAAATCCTCAATATAATGTTTGCTCCTTTGTAATGTT  
ACAATGTCCACCTTATCTTATG

ATGTAACCACTTATTGAATTATGCTCTTGCTGTATTACAACAACCTGCAGGATTTAATGCGAACACGAC  
GTTTGTGGGCTTACTTATCTT

GGGAATAGCAGCTTTGATAAGCGCAATTACTTCTGTTACTGTGGCAGCAATATCATTGACTCAACAA  
GTACATACTGCTCAATATGTTGA

TTCTATGTCCAAAATGTTTCTTTAGCATTGGCAACACAGGAAGCTATAGACAGGAAATTAGAAATG  
AGGGTAGATGCCCTAGAGGAAGC

AGTAATACATATTGGGACTGAATTGCAGGCTTTAAAGGTGAAAATGGCATTGTCCTGTCATGCTGAC  
TACCGGTGGATATGTGTAACACC

CCTGAAAGTAAATGAGACAGATTTTGAATGGGAAAAGATTA AAAACCATATTT CAGGTATTTGGAAC  
AGCTCTGACATTAGCTTAGACTT

AGGGAACTTCACAATCAAATAGCAACCCTGGAACACTCCCGATTAGATTTTACTGCCGCTGGAAC  
AGCAAATGATTTCTTCCATACTTT

CTCTAACTACATTT CAGGAAAAAATATTCTGTCTACCTT CCTCGGCTACGCTACCTTGGCTGTTTTAA  
TTTTATTTCTAATAATCATTCT

TCCTTGATTGTCAGGATTCTTCGGCAGAGCATT CAGAGGCTCGCGACTGAGCTACATCTGGCTGT  
TTTAAGAAATAAAAAAGGGGGAGA

TGCGGGGAGCCGGTGAGGCATTCCACTCGTGACAAAGGTCATGAGGAAGGAGGCTCGGCATACG  
CAAAGGCGGGATCGAGCCTCAGGAGT

CCCCCGGATATTCTCGAGCATTTTCCCCCAAAAAC CAGAGTCTGCCTACTTTATTGCTTTGTGCT  
CTCACCTCTGACTTTACTGGGGG

CTGTCCCCTACCACCGTCTCTCTCTCTGTGTCAAAGAGT TAACTTACAGCTCCAATTAATAAAGTT  
CCTGGGCAATTAGGAGTGTTTA

AATCCAAACCCCTCTGATGGCTCTCTAACTCGCCTGACAAGTTT ACCCGGACTCCTGCAGCTATGC  
ATACGATTGTTTACAGTCTCCAG

CCTCGAGAGGCATGGGAAGCTTAAGATATTCAAATAGCTTAGAGCCTCTCAGAGAGTTAAAACTG  
TCAGAATAAACTAGTAAAGGATTT

CATTGATGAGTCAATGCTTGTTGCCAAGTTTT CACATCCCCTGAATTGTATCCTTGAATATGTATCAA  
TTAATAGTGGGTATGTAGAAAA

AATAAGTAGTGGCCTTGGTGTTAGTAACTTTAGACCCTTAAGGTAATAAATTCTTTCTTTGTTGTA  
CCATTACACATCCGCCCTATA

GGAATGCAATTTTATCTTTGGAAGATGGTGCCAAACCTT GAAATAATTA CTCTTAGAGAAAGTAAGT  
CTTTGTTGATAAGTCCTTGTCAA

GAGTCATAAAATGTTAGTAGGCCTTCTGGCCAGAAGATGATGTAAATCACCTAAACCATTTGTATAC  
GATACATTTGCAGGAAAGAAACC

TTGGTTTTTGATAAGAATCAAAGACTGCTGACTTTGCATCCCCTATTATCCTCTATGTGTAACCTAGG  
GTATAAAAGCCCCTGTAAAAA

TAAAGCTACGGGCCTTGCTCACCAACGCTTGGTCTCCCCATGTCATTCTTTAACTTCCAGCTGAGT  
CTCCATCTGGAGCGCGGAACCCA

CCACGCTTACTAATCATGCCTGGGCTTCTAAGACCCACTCGAGAAGGTGTCTAGGGTGAGACACCT  
TCCGCTATTGAGAGGGCGCCTGC

GGCCTACGTAAGTGGTGCAAACCTTCTTGTCTTGAAGTTTTATTGGTCTCCCGCGTAAACCAAGCTAC  
TCAGCTTCTTTTCTCCACTGAAA

TTTCCTACTGAGCTATCCTCATTCTATTGTTCTCTATATCCCTAATTAGCATATAAATAGTCGCCGAC  
GCCGTCTCCCCTTCGAATACCC

TGGATCAGCCGGGGCTGGTCCTCGGCA
